# Supplementary material
Source: publisher figshare collection journal article supplement (https://plos.figshare.com/articles/dataset/_/4221999)

Supplementary Figure 3: Complex network-based immunoprofiles

immunohistochemical type

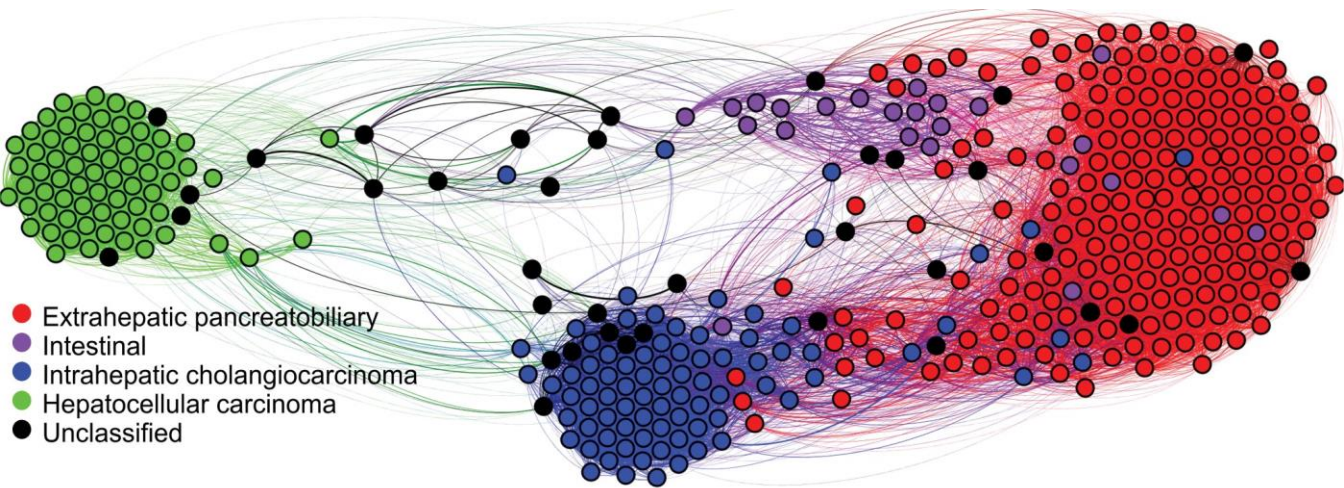

**anatomical diagnosis**

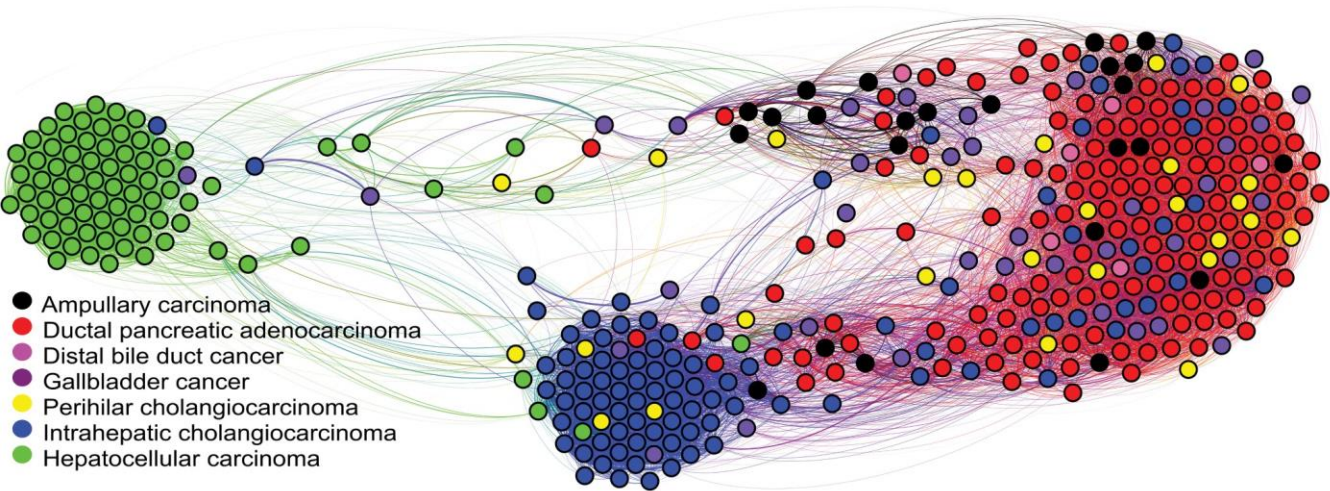

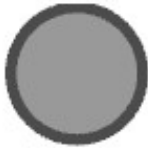 **Missing Value**

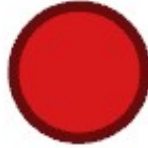 **0%**

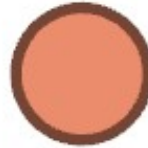 **25%**

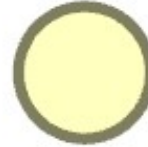 **50%**

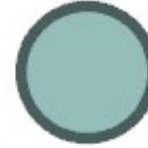 **75%**

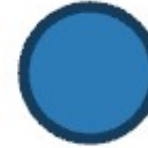 **100%**

**ck5**

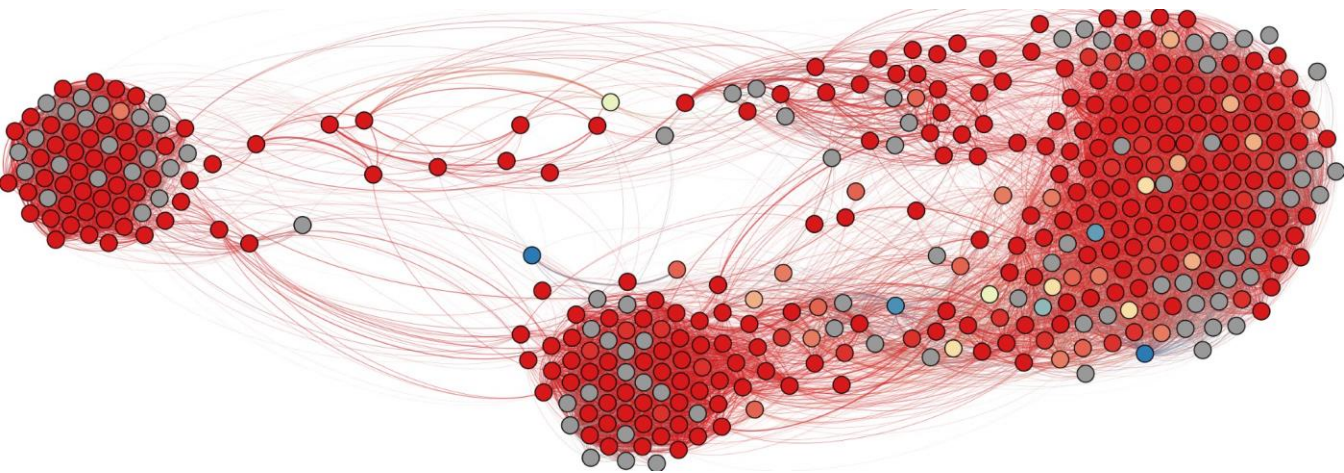

**ck7**

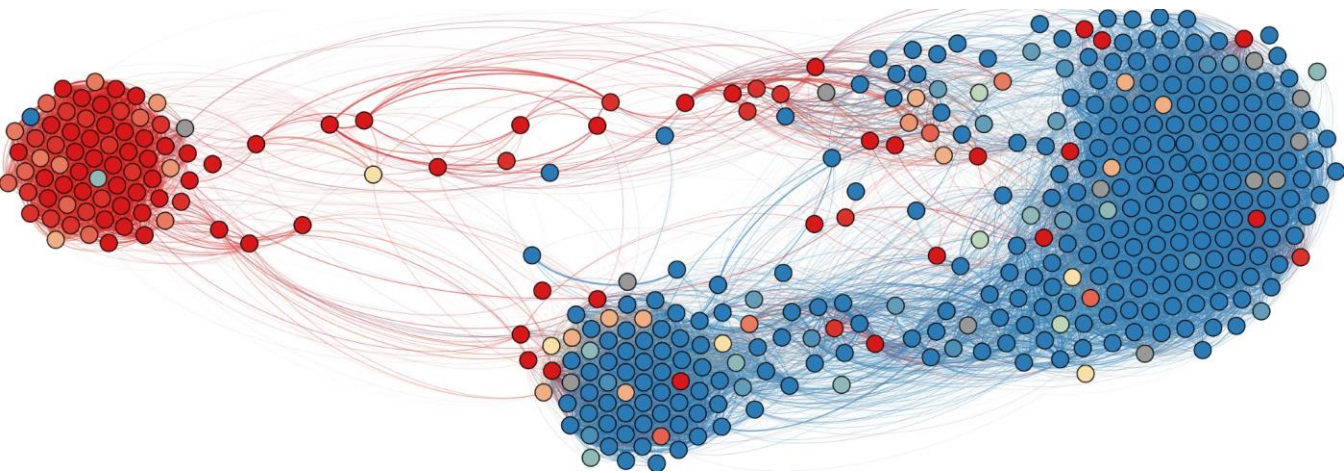

ck17

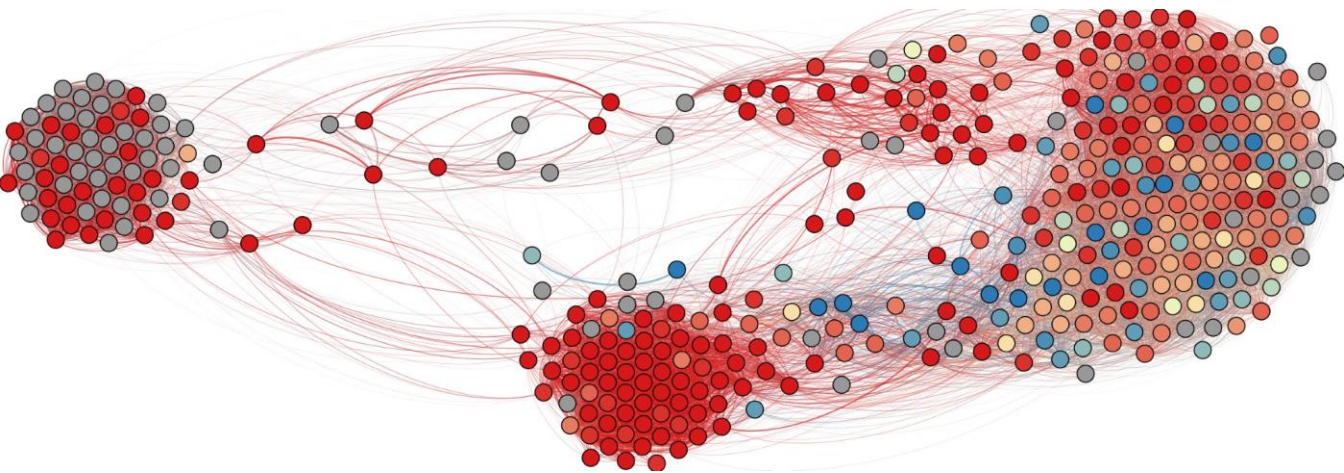

**ck18**

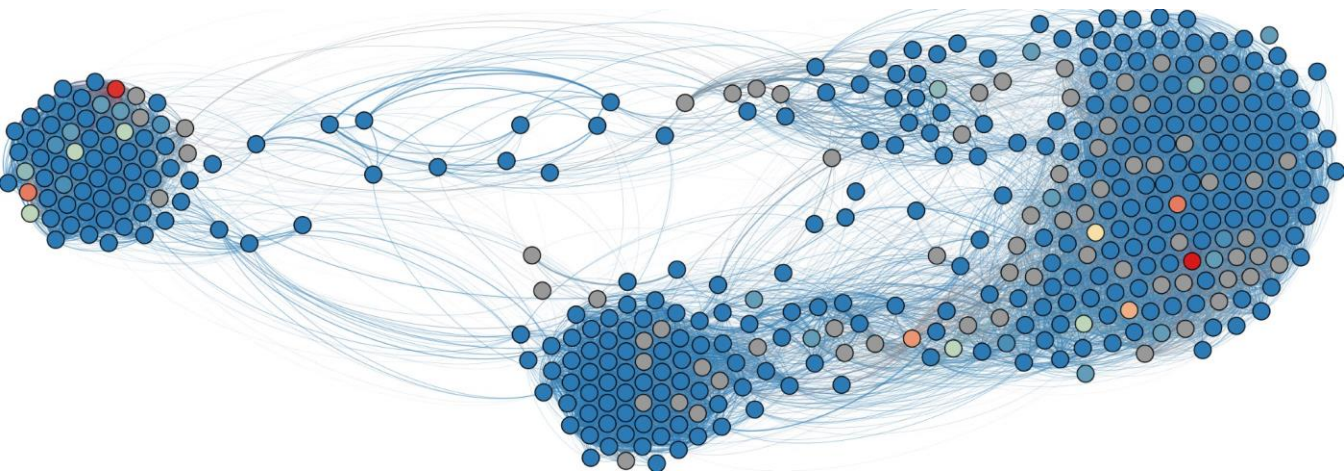

ck19

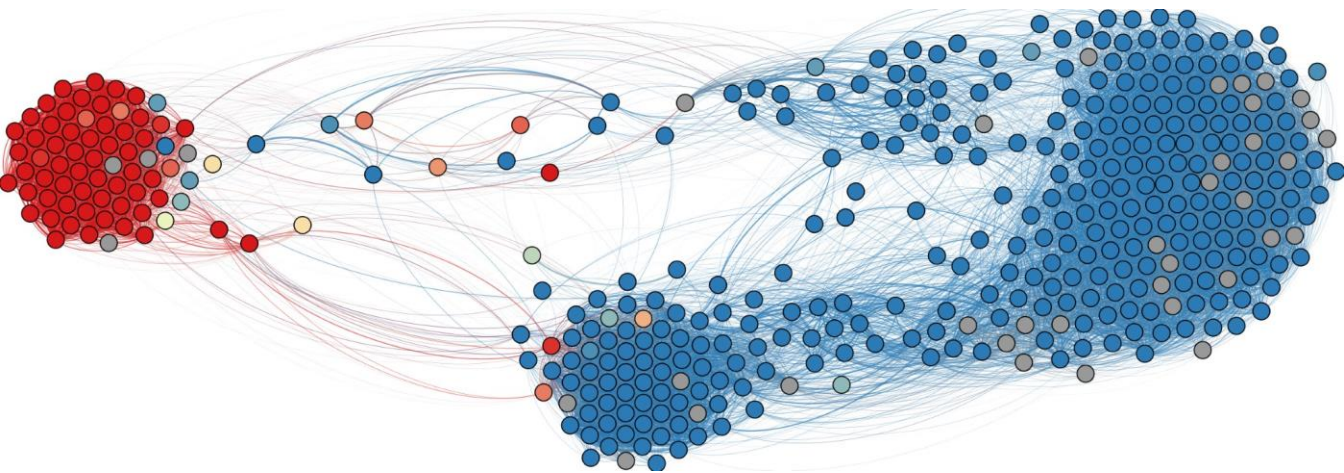

ck20

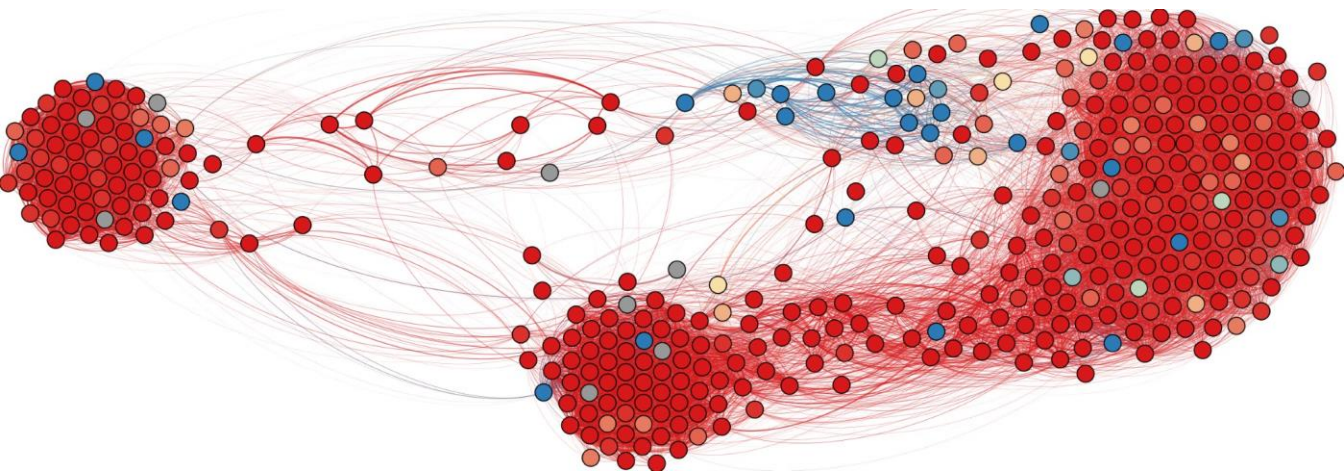

**vim**

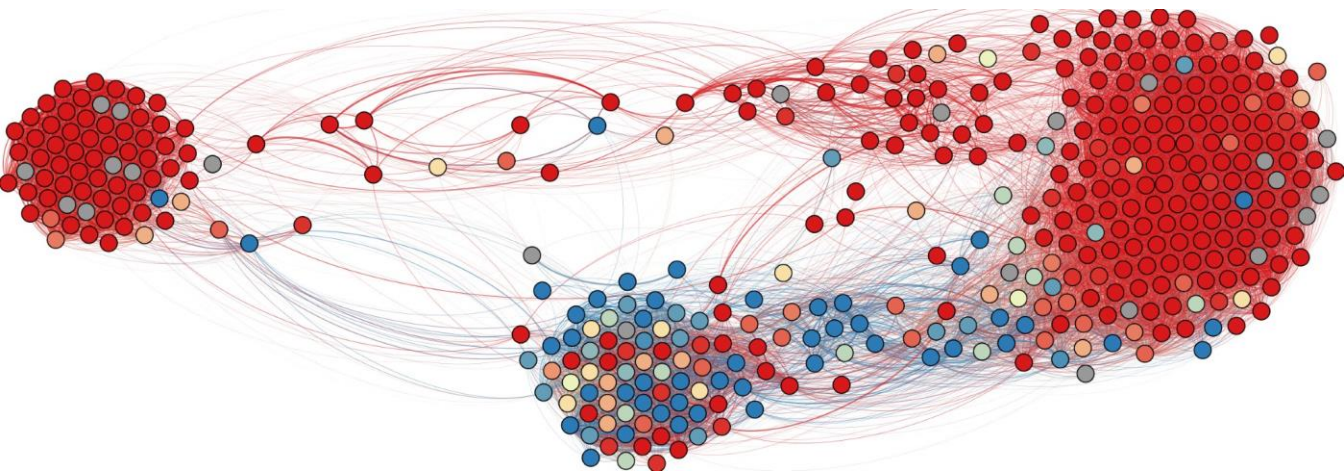

**muc1**

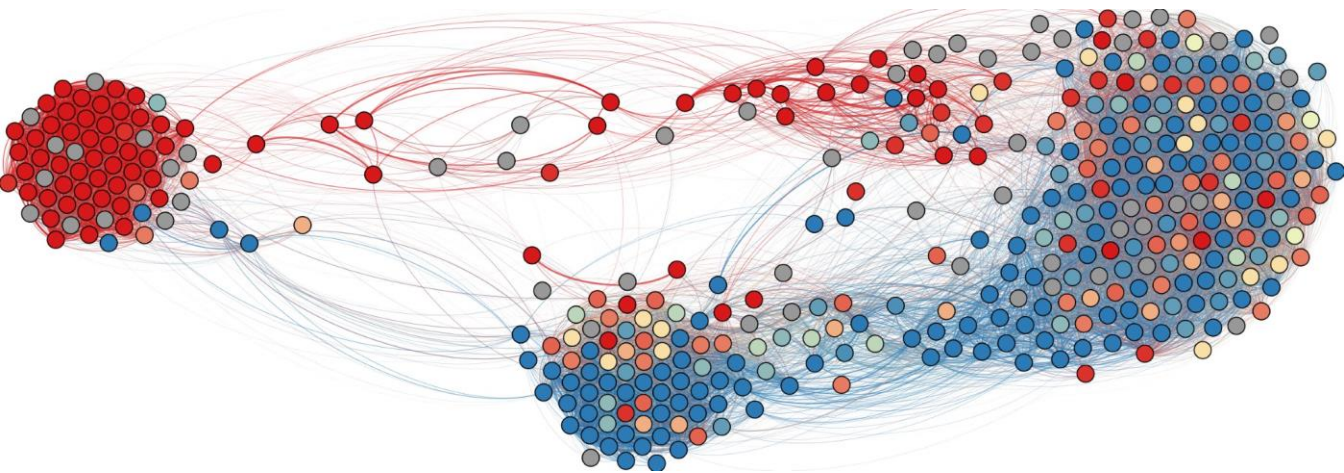

**muc2**

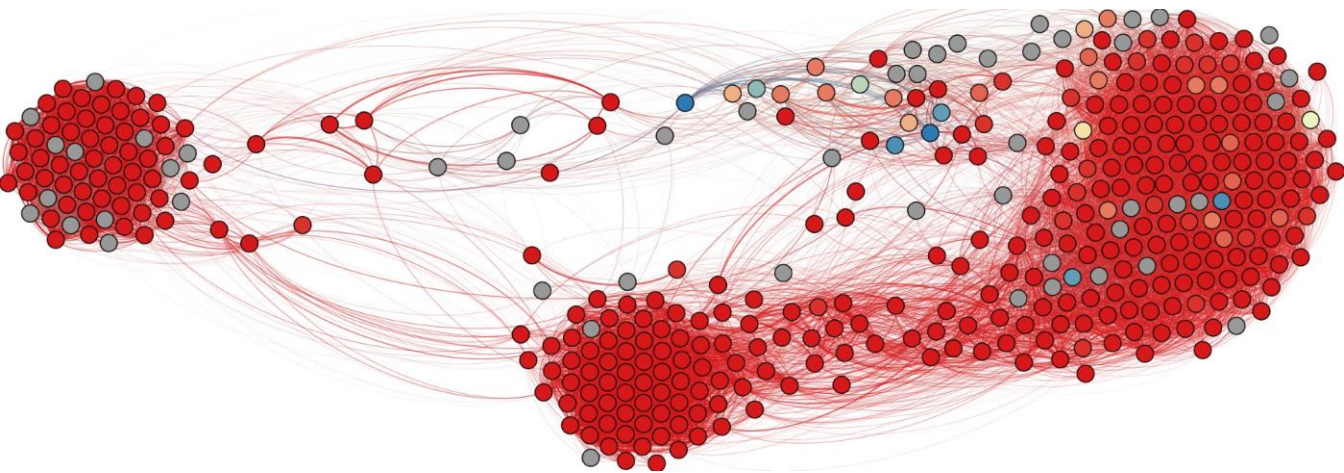

**muc5ac**

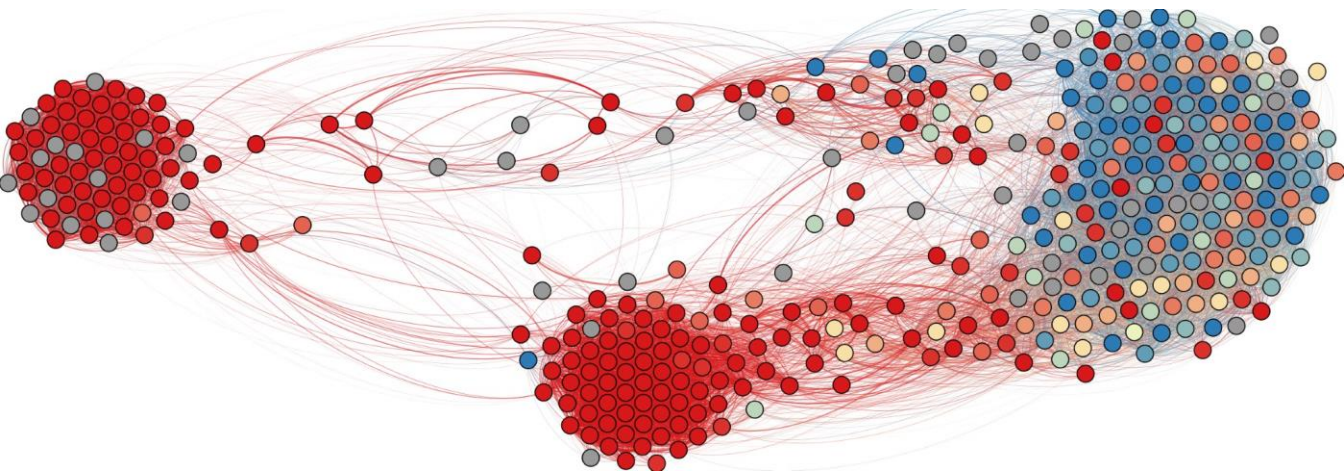

**muc6**

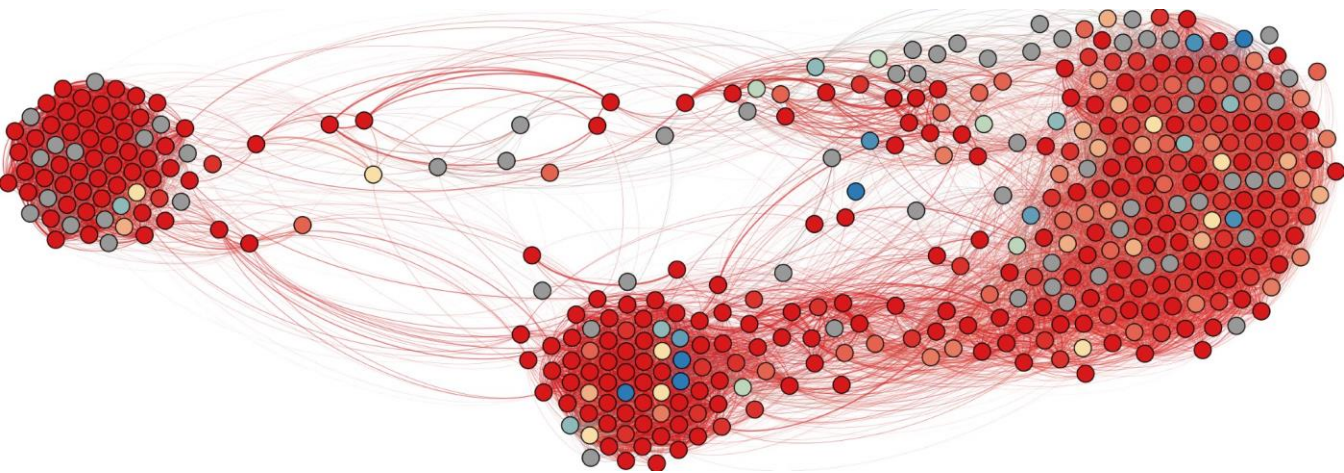

**berep4**

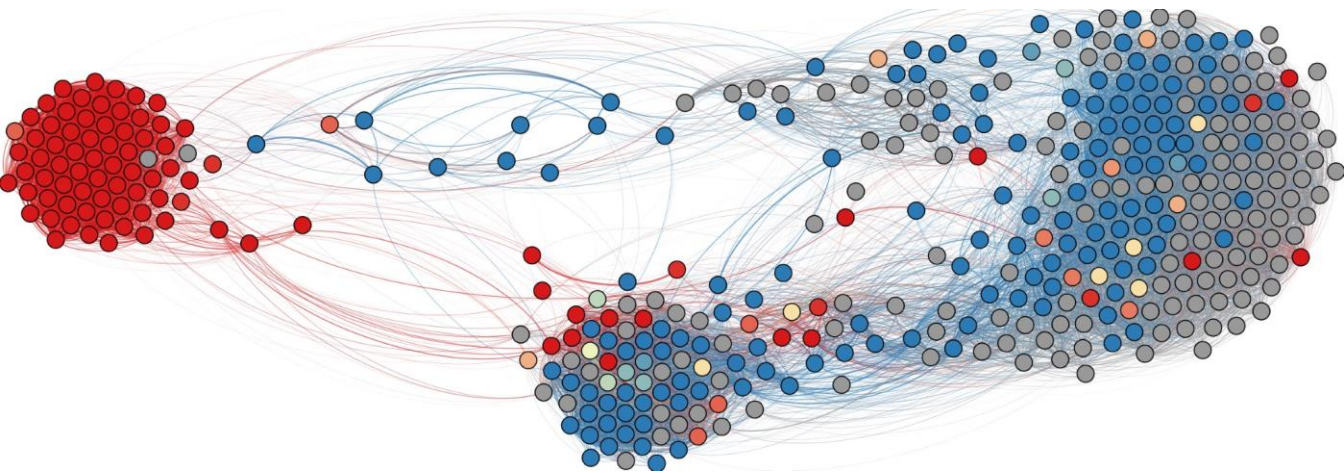

ema

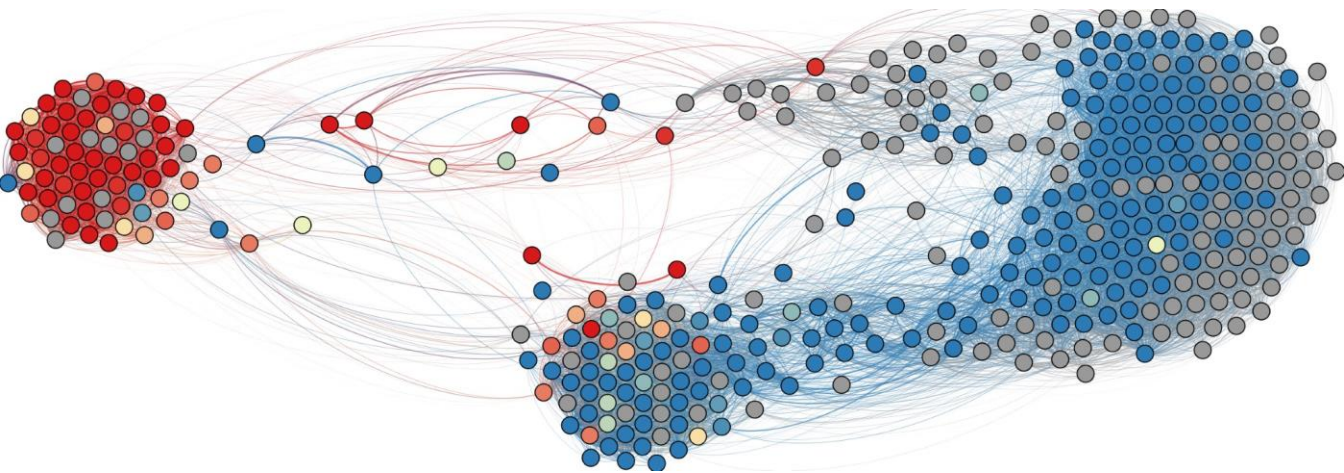

cea\_m

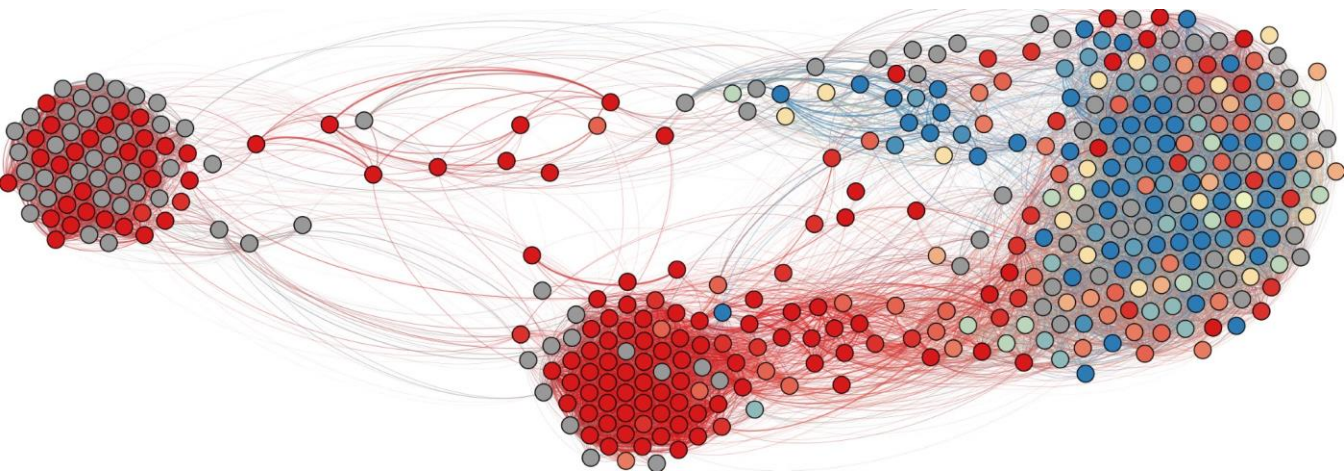

cea\_p

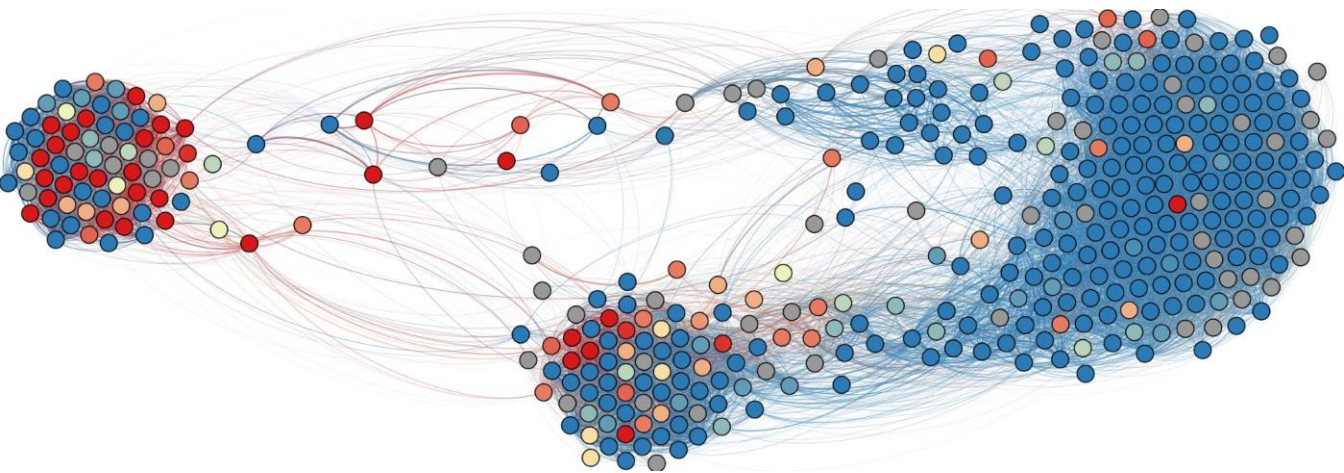

**ca125**

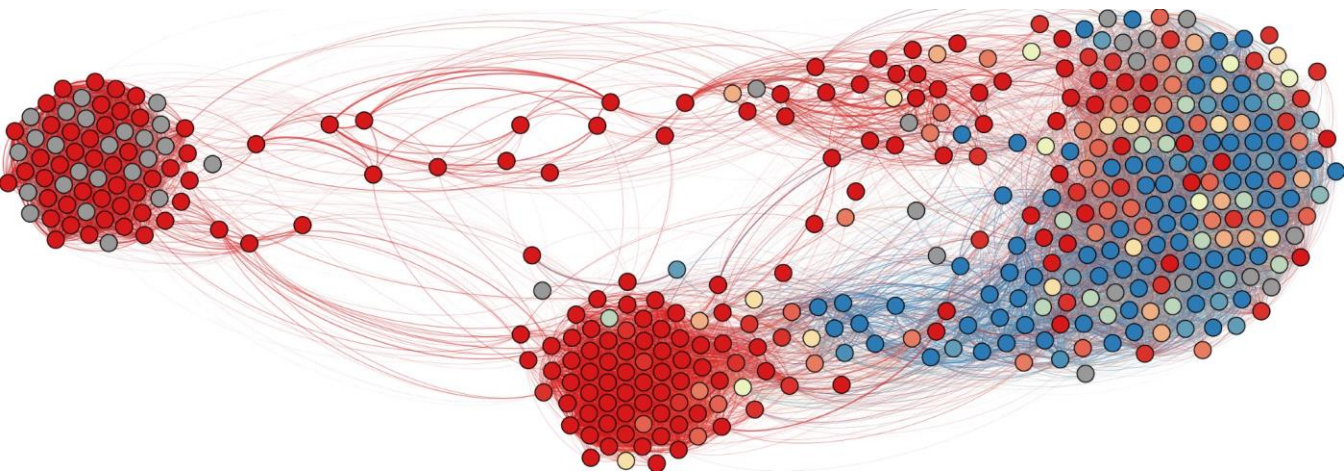

**ca19\_9**

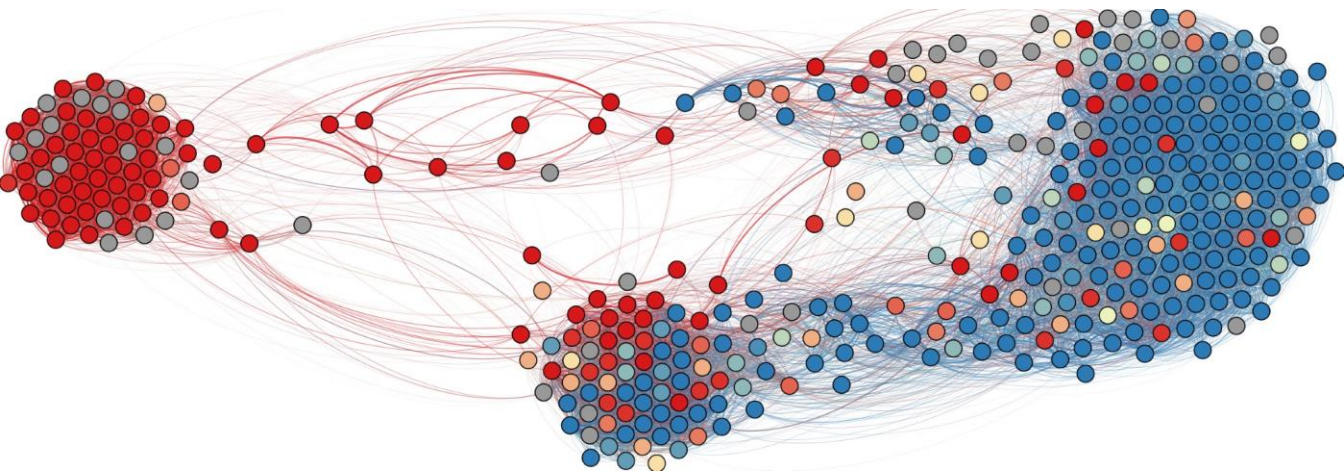

**maspin**

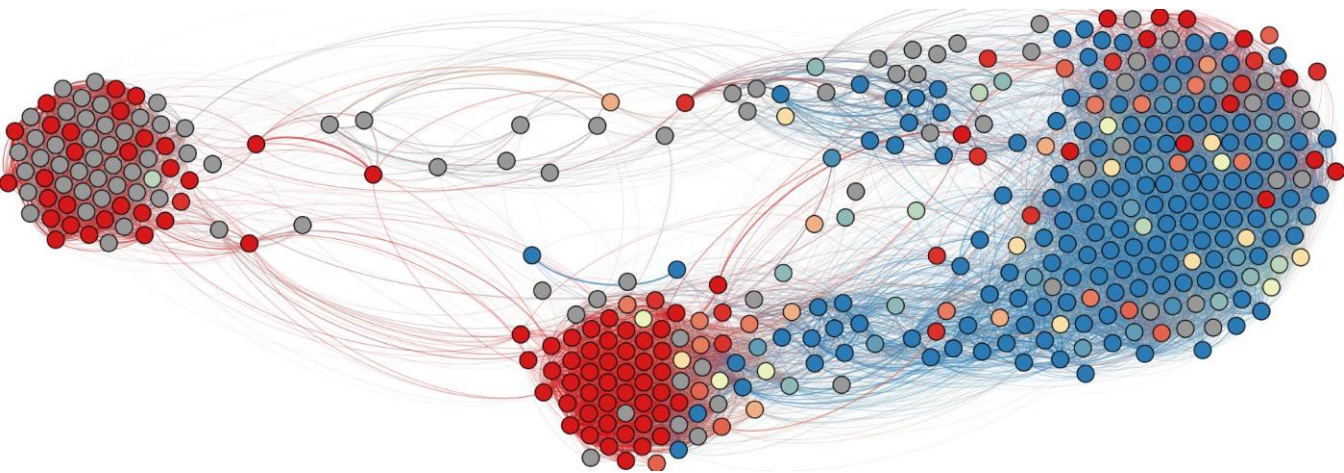

**wt1cyt**

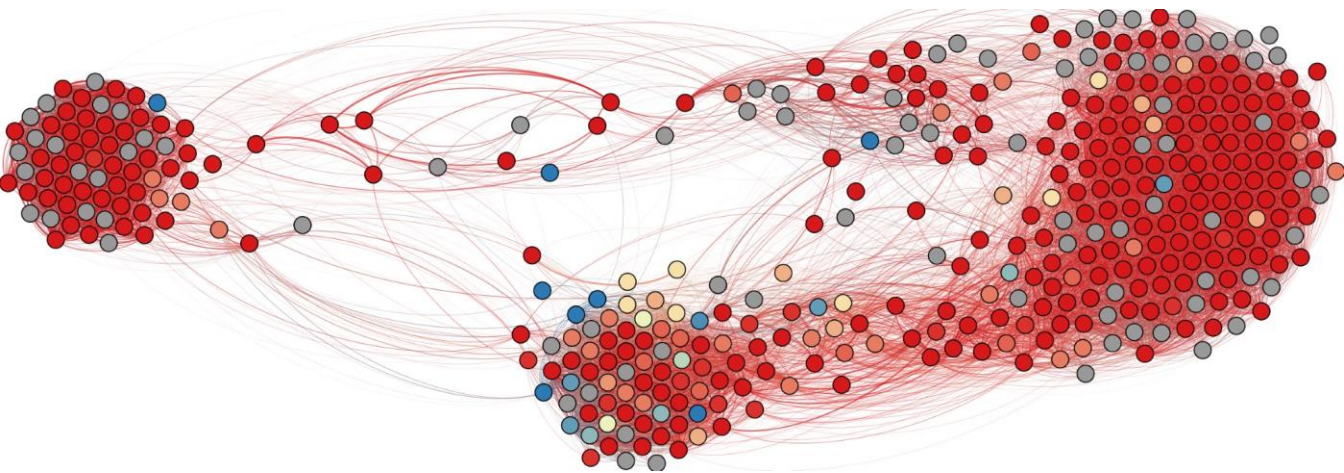

**cdx2**

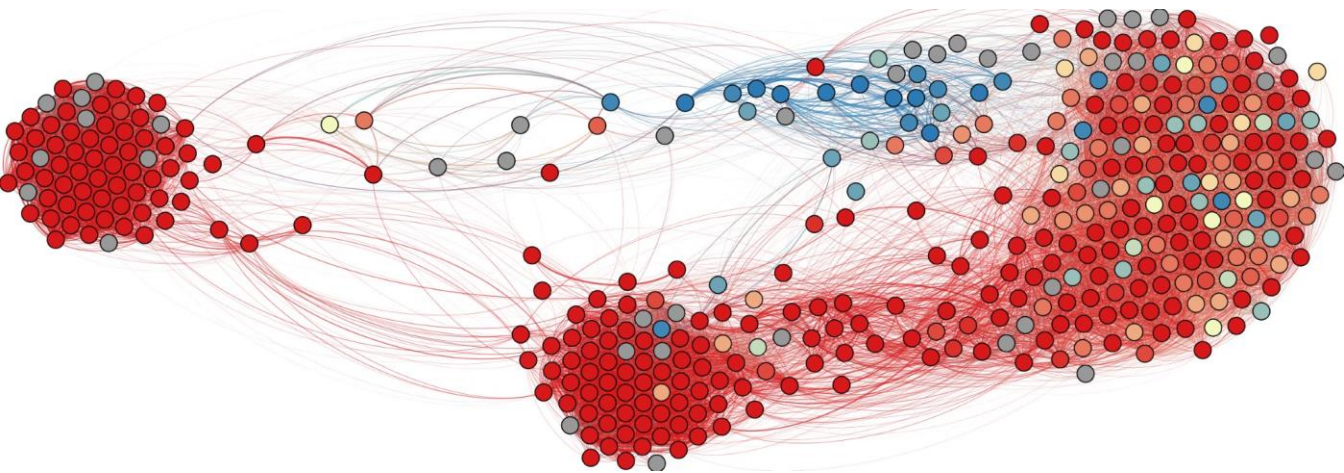

p53

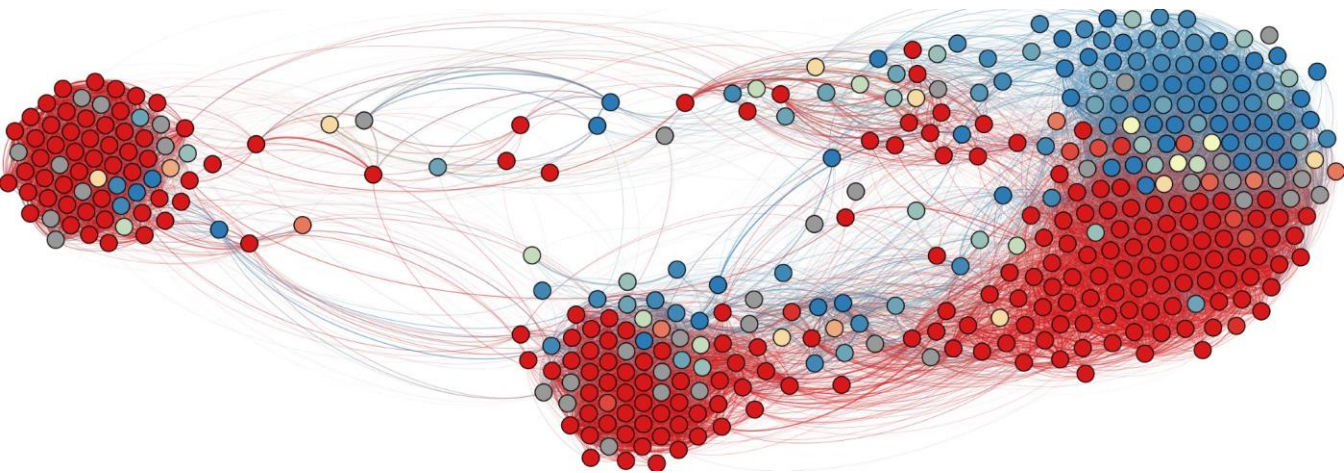

**p63**

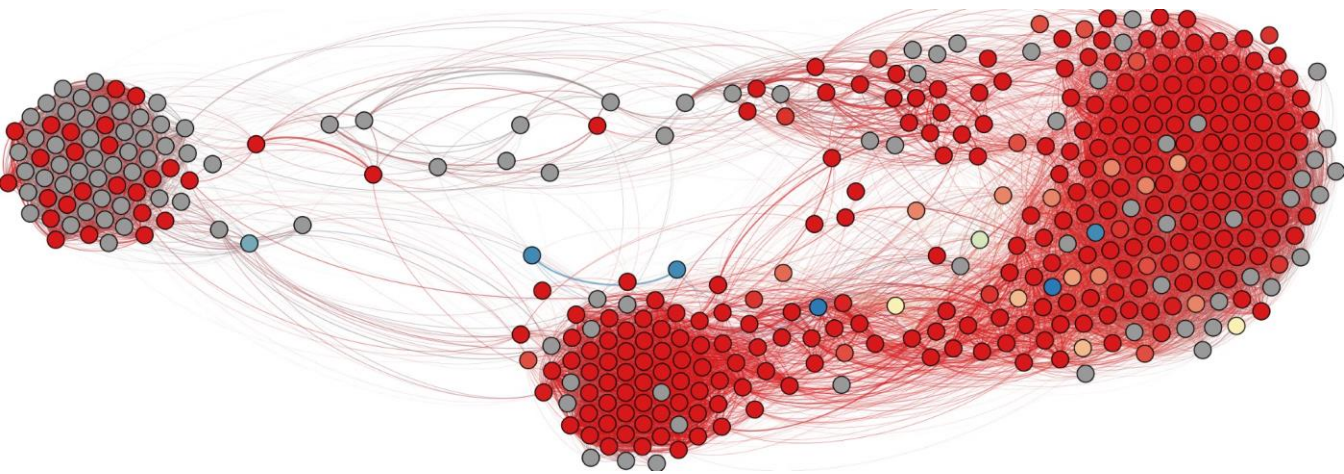

**ki67**

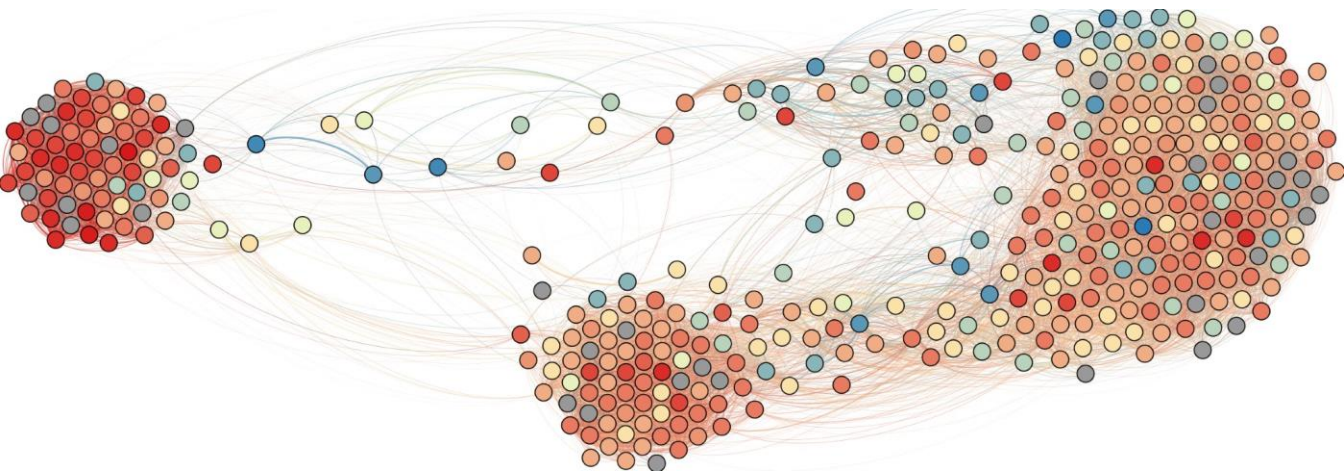

**smad4**

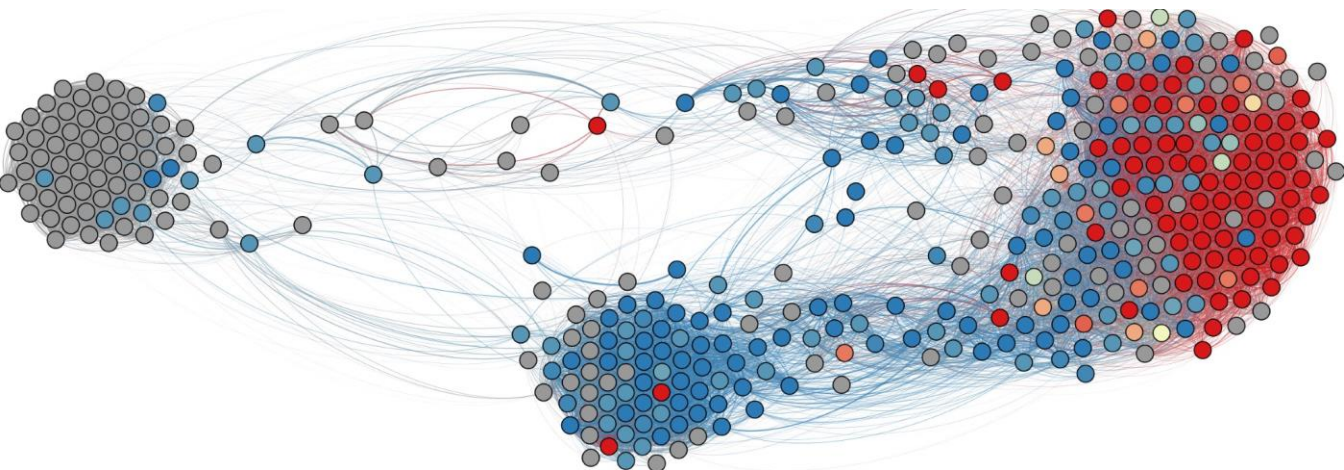

**chra**

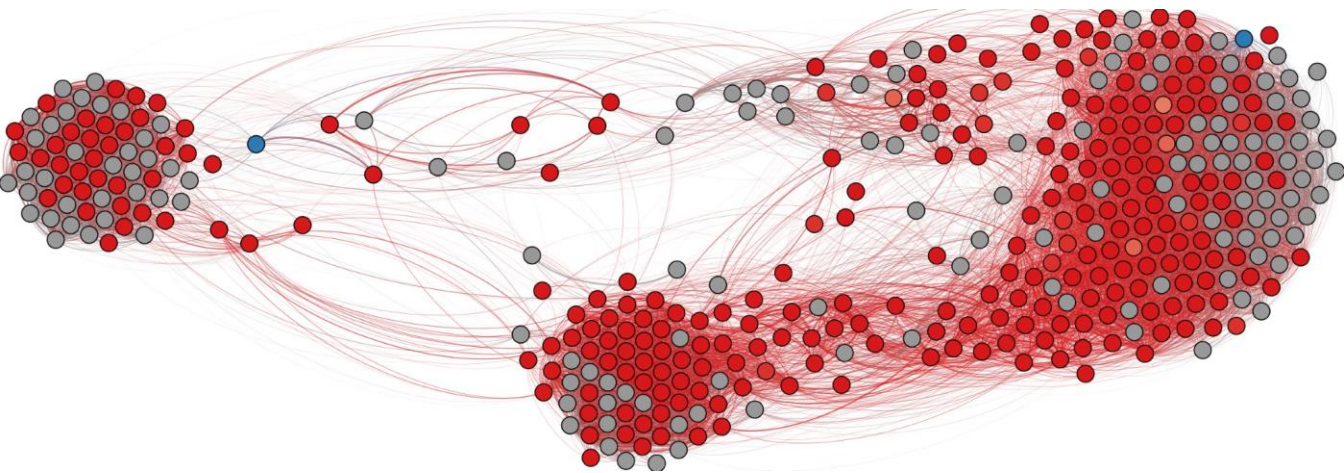

**cd56**

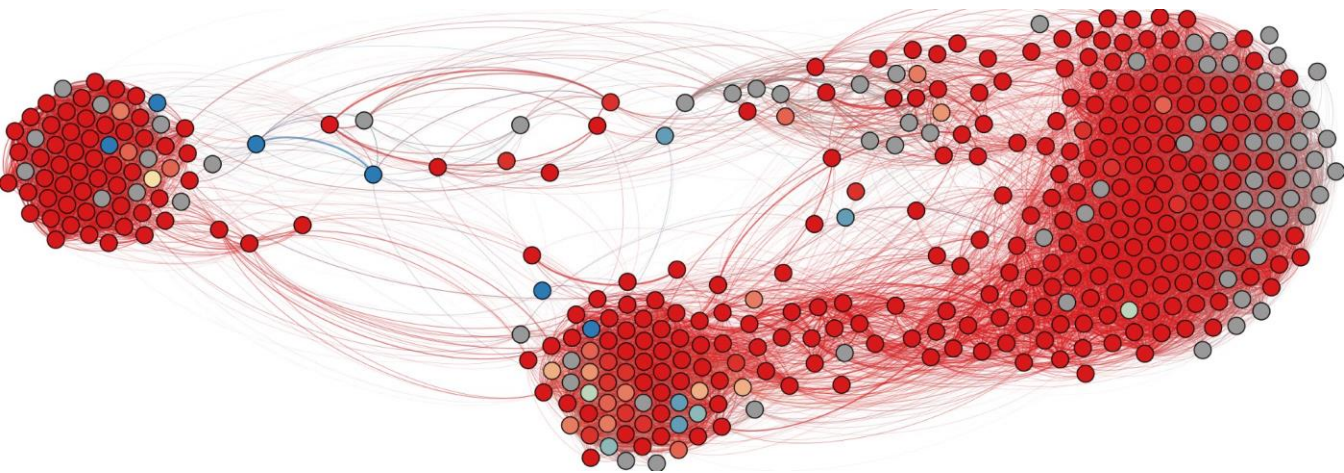

**cd10**

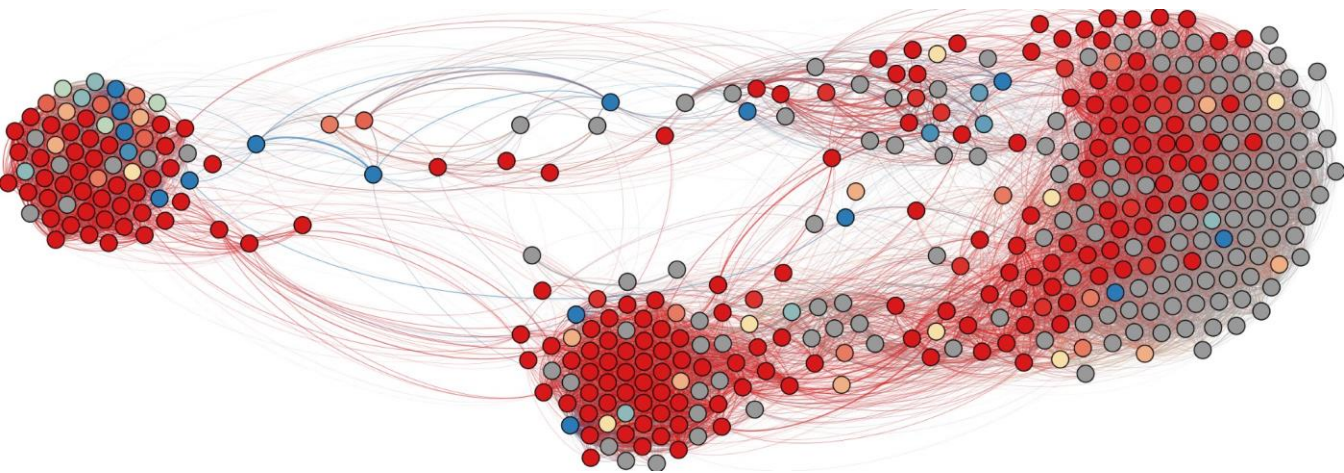

Supplement: Supplementary file 1 [file 1 › S3 Fig.PDF]
