# Supplementary material
Source: publisher figshare collection journal article supplement (https://plos.figshare.com/articles/dataset/_/4221999)
Supplement: Supplementary file 1 [file 1]

Archive with 9 entries (9 files):
- S1 Fig.PDF
- S1 File.PDF
- S1 Table.PDF
- S2 Fig.PDF
- S2 File.PDF
- S2 Table.PDF
- S3 Fig.PDF
- S3 File.PDF
- S3 Table.PDF
