# Supplementary material
Source: publisher figshare collection journal article supplement (https://plos.figshare.com/articles/dataset/_/4221999)
Supplement: Supplementary file 1 [file 1 › S1 File.PDF]

# Immunoprofiling of adenocarcinomas of the pancreatobiliary system

## Analysis of missing data & imputation

Generated on: 2016-03-03 17:26:10

Import required packages

```
# Build pre-requisites
# install.packages("plyr")
# install.packages("Amelia")
# source("http://bioconductor.org/biocLite.R")
# biocLite("impute")

library(plyr)
library(Amelia)
```

```
## Loading required package: Rcpp
## ##
## ## Amelia II: Multiple Imputation
## ## (Version 1.7.3, built: 2014-11-14)
## ## Copyright (C) 2005-2016 James Honaker, Gary King and Matthew Blackwell
## ## Refer to http://gking.harvard.edu/amelia/ for more information
## ##
```

```
library(impute)
```

Configure file names

```
#myWorkDirectory <- "~/Workspace/research/pcbil/"
myWorkDirectory <- "/home/guest/pcbil/"
rawDataFileName <- paste(myWorkDirectory, "raw/pcbil_raw.csv", sep="")
imputedDataFileName <- paste(myWorkDirectory, "data_analysis/tidy_datasets/
pcbil_imputed.csv", sep="")
```

Importing raw dataset /home/guest/pcbil/raw/pcbil\_raw.csv ...

```
pcbilDataRaw <- read.csv(file = rawDataFileName, row.names = 39, colClasses
= c(rep("numeric",38), rep("character",2)), na.strings = "?",quote="'")
```

Creating working dataset for processing

```
pcbilDataWork <- pcbilDataRaw
```

## Process column names

```
names(pcbilDataWork) <- tolower(names(pcbilDataWork))
names(pcbilDataWork)[39] <- "clin_diag"
pcbilDataWork$clin_diag <- as.factor(pcbilDataWork$clin_diag)
```

## Recode clinical diagnoses according to AJCC/IUCC-TNM 7 nomenclature

```
revalue(pcbilDataWork$clin_diag, c("Ampulla Ac" = "Ampullary carcinoma"))
-> pcbilDataWork$clin_diag
revalue(pcbilDataWork$clin_diag, c("Distal Bile Duct Ac" = "Distal bile duct cancer"))
-> pcbilDataWork$clin_diag
revalue(pcbilDataWork$clin_diag, c("Gallbladder Ac" = "Gallbladder cancer"))
-> pcbilDataWork$clin_diag
revalue(pcbilDataWork$clin_diag, c("Hepatocellular Cancer" = "Hepatocellular carcinoma"))
-> pcbilDataWork$clin_diag
revalue(pcbilDataWork$clin_diag, c("Intrahepatic Cholangiocarcinoma" = "Intrahepatic cholangiocarcinoma"))
-> pcbilDataWork$clin_diag
revalue(pcbilDataWork$clin_diag, c("Pancreas Ac" = "Ductal pancreatic adenocarcinoma"))
-> pcbilDataWork$clin_diag
revalue(pcbilDataWork$clin_diag, c("Perihiliary Ac" = "Perihilar cholangiocarcinoma"))
-> pcbilDataWork$clin_diag
```

## Show fixed column names

```
head(pcbilDataWork[1:5])
```

```
##                                ck5  ck7 ck17 ck18 ck19
## Pancreas Ac|397                  0 92.5   20   NA 92.5
## Hepatocellular Cancer|190        0 20.0    0 92.5 50.0
## Pancreas Ac|25                   0 92.5    0 92.5 92.5
## Gallbladder Ac|108               NA 70.0   NA 92.5 85.0
## Hepatocellular Cancer|336         0  0.0   NA 92.5 40.0
## Intrahepatic Cholangiocarcinoma|293 5 92.5    5   NA 92.5
```

## Report raw dataset composition

```
#Total number of tumor samples
dim(pcbilDataWork)[1]
```

```
## [1] 439
```

```
#Total number of markers
dim(pcbilDataWork)[2]
```

```
## [1] 39
```

```
#List of markers
names(pcbilDataWork)
```

```
## [1] "ck5"      "ck7"      "ck17"     "ck18"     "ck19"
## [6] "ck20"     "vim"      "muc1"     "muc2"     "muc5ac"
## [11] "muc6"     "bereg4"   "ema"      "mcea"     "pcea"
## [16] "ca125"    "ca19.9"   "maspin"   "wt1cyt"   "ttf1"
## [21] "cdx2"     "p53"      "p63"      "ki67"     "ezh2"
## [26] "smad4"    "chra"     "synap"    "cd56"     "cd10"
## [31] "cd146"    "cd146_nucl" "calretinin" "hbm1"     "mesothelin"
## [36] "hepatocyte" "glypican_3" "ngfr_str"  "clin_diag"
```

### Fix one incorrect anatomical-based diagnosis

```
pcbilDataWork[rownames(pcbilDataWork) == "Intrahepatic Cholangiocarcinoma|366" , "clin_diag"] <- "Gallbladder cancer"
```

### Composition of the raw dataset by anatomical-based diagnosis

```
table(pcbilDataWork$clin_diag)
```

```
##
##           Ampullary carcinoma           Distal bile duct cancer
##                   24                   8
##           Gallbladder cancer           Hepatocellular carcinoma
##                   38                   100
## Intrahepatic cholangiocarcinoma Ductal pancreatic adenocarcinoma
##                   98                   143
##           Perihilar cholangiocarcinoma
##                   28
```

### Summary of missing values by marker

```

propmiss <- function(dataframe) {
  m <- sapply(dataframe, function(x) {
    data.frame(
      nmiss=sum(is.na(x)),
      n=length(x),
      propmiss=round(sum(is.na(x))/length(x),2)
    )
  })
  d <- data.frame(t(m))
  d <- sapply(d, unlist)
  d <- as.data.frame(d)
  d$variable <- row.names(d)
  row.names(d) <- NULL
  d <- cbind(d[ncol(d)],d[-ncol(d)])
  return(d[order(d$propmiss), ])
}

reportmiss <- function(dataframe) {
  propMiss <- propmiss(dataframe)
  print(propMiss)
  totalNumValues <- dim(dataframe)[1] * (dim(dataframe)[2] - 1)
  totalMissingValues <- sum(propMiss$nmiss)
  return ( (100 / totalNumValues) * totalMissingValues )
}

pcbilDataWorkMissingValues <- reportmiss(pcbilDataWork)

```

```
##      variable nmiss    n propmiss
## 39  clin_diag     0 439      0.00
## 2    ck7         14 439      0.03
## 6    ck20        20 439      0.05
## 7    vim         31 439      0.07
## 22   p53         46 439      0.10
## 24   ki67        44 439      0.10
## 5    ck19        49 439      0.11
## 15   pcea        64 439      0.15
## 16   ca125       66 439      0.15
## 17   ca19.9      71 439      0.16
## 21   cdx2        69 439      0.16
## 4    ck18        75 439      0.17
## 9    muc2        79 439      0.18
## 10   muc5ac      79 439      0.18
## 8    muc1        83 439      0.19
## 11   muc6        92 439      0.21
## 3    ck17       100 439      0.23
## 29   cd56        99 439      0.23
## 1    ck5       113 439      0.26
## 19   wt1cyt     114 439      0.26
## 14   mcea       120 439      0.27
## 18   maspin     125 439      0.28
## 23   p63       132 439      0.30
## 12   berep4    164 439      0.37
## 13   ema       167 439      0.38
## 27   chra      171 439      0.39
## 30   cd10      171 439      0.39
## 26   smad4     175 439      0.40
## 20   ttf1     211 439      0.48
## 31   cd146    247 439      0.56
## 38   ngfr_str  273 439      0.62
## 32  cd146_nucl 293 439      0.67
## 33  calretinin 313 439      0.71
## 37  glypican_3 320 439      0.73
## 35  mesothelin 357 439      0.81
## 34   hbme1     365 439      0.83
## 36  hepatocyte 365 439      0.83
## 25   ezh2     389 439      0.89
## 28   synap    397 439      0.90
```

```
#Total percentage of missing data in processed dataset (%):
round(pcbilDataWorkMissingValues, 0)
```

```
## [1] 36
```

Summary of missing values by tumour sample

```

reportmissperrow <- function(dataframe) {

  pads <- c()
  numMissingValues <- c()
  propMissingValues <- c()

  aRow <- 1
  while(aRow <= nrow(dataframe)) {
    pads <- c(pads, row.names(dataframe)[aRow])
    numMissing <- sum(is.na(dataframe[aRow,]))
    propMissingValues <- c(propMissingValues, round((100 / (dim(dataframe)
[2] -1)) *numMissing,2))
    numMissingValues <- c(numMissingValues, numMissing)
    aRow <- aRow + 1
  }
  missingD <- data.frame(pad = pads, nmissing = numMissingValues, propmissin
g = propMissingValues, stringsAsFactors=F)
  missingD$propmiss_interv <- cut(missingD$propmissing, c(0,10,20,30,40,50,6
0,70,80,90,100))

  print(table(missingD$propmiss_interv))

  return (subset(missingD, propmissing > 50)[, 1])
}

numCasesMissGreat50 <- reportmissperrow(pcbilDataWork)

```

```

##
##   (0,10]  (10,20]  (20,30]  (30,40]  (40,50]  (50,60]  (60,70]  (70,80]
##         10      48      107      123       72       49       18       5
##   (80,90] (90,100]
##         6        1

```

```

#Number of cases in work dataset with more than 50% missing data:
length(numCasesMissGreat50)

```

```

## [1] 79

```

## Amelia Missingness Map

```

missmap(pcbilDataWork, main = "Missingness map pcbilDataWork")

```

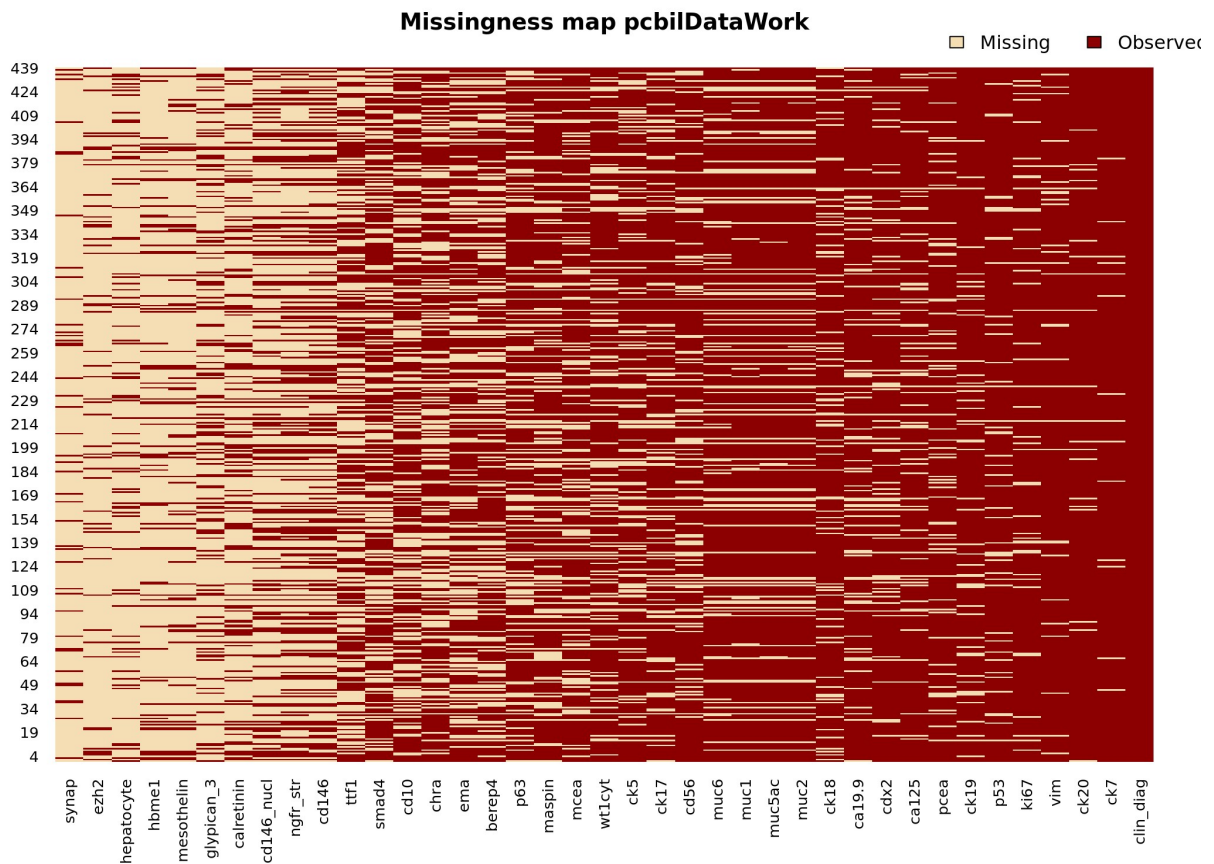

Missing values handling strategy, step 1 - remove markers with > 40% missing values: ttf1, cd146, cd146\_nucl, ngfr\_str, calretinin, glypican\_3, ezh2, synap, hbme1, mesothelin, hepatocyte

```
pcbilDataMarkerTrimmed <- subset(pcbilDataWork, select=-c(ttf1, cd146, cd146_nucl, ngfr_str, calretinin, glypican_3, ezh2, synap, hbme1, mesothelin, hepatocyte))
```

Check the missing values in the marker trimmed dataset

```
pcbilDataMarkerTrimmedMissingValues <- reportmiss(pcbilDataMarkerTrimmed)
```

```
##      variable nmiss    n propmiss
## 28 clin_diag      0 439      0.00
## 2      ck7       14 439      0.03
## 6      ck20      20 439      0.05
## 7      vim       31 439      0.07
## 21     p53       46 439      0.10
## 23     ki67      44 439      0.10
## 5      ck19      49 439      0.11
## 15     pcea      64 439      0.15
## 16     ca125     66 439      0.15
## 17     ca19.9    71 439      0.16
## 20     cdx2      69 439      0.16
## 4      ck18      75 439      0.17
## 9      muc2      79 439      0.18
## 10     muc5ac    79 439      0.18
## 8      muc1      83 439      0.19
## 11     muc6     92 439      0.21
## 3      ck17     100 439      0.23
## 26     cd56      99 439      0.23
## 1      ck5      113 439      0.26
## 19     wt1cyt   114 439      0.26
## 14     mcea     120 439      0.27
## 18     maspin   125 439      0.28
## 22     p63     132 439      0.30
## 12     berep4   164 439      0.37
## 13     ema     167 439      0.38
## 25     chra    171 439      0.39
## 27     cd10    171 439      0.39
## 24     smad4   175 439      0.40
```

```
#Total percentage missing data in dataset after trimming of markers: (%)
round(pcbilDataMarkerTrimmedMissingValues, 0)
```

```
## [1] 21
```

```
missmap(pcbilDataMarkerTrimmed)
```

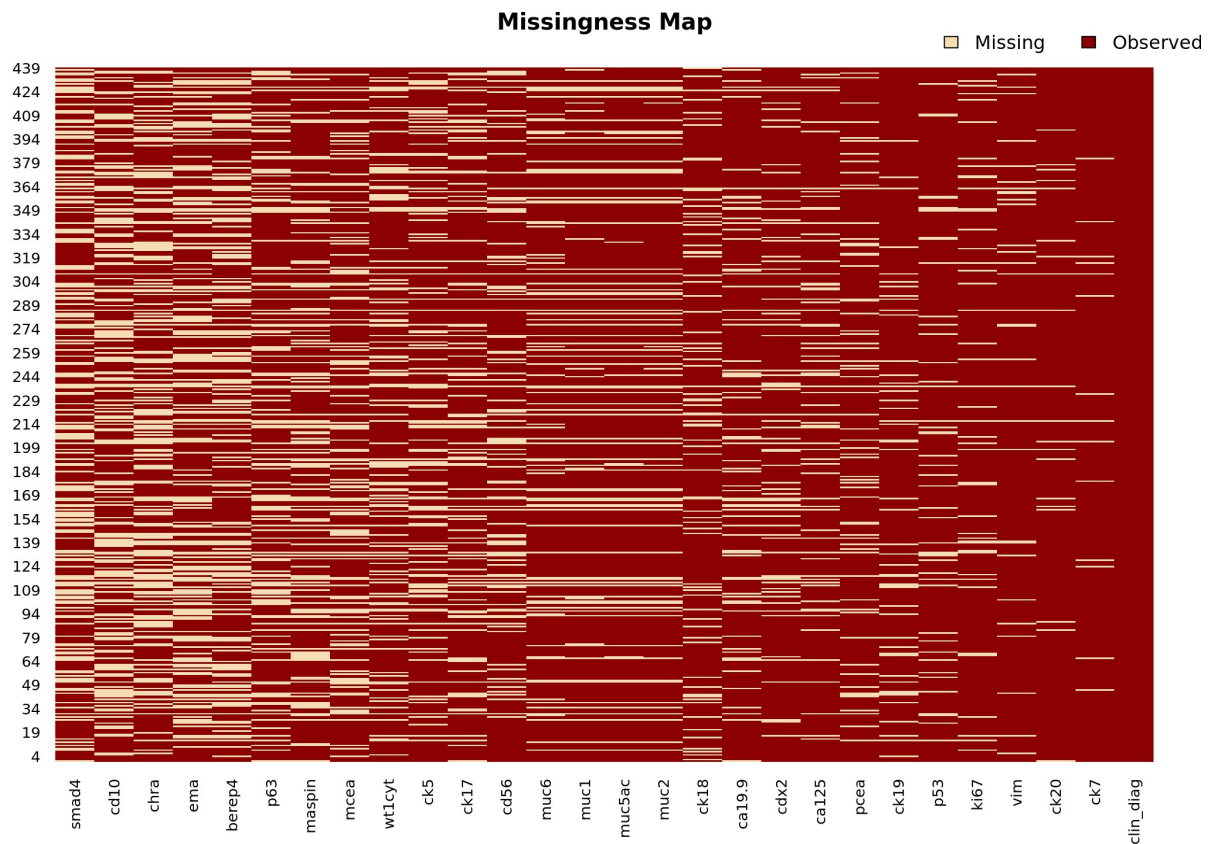

Filtering of markers with >40% missing data resulted in 15% improvement on data-value coverage

Missing values in marker trimmed dataset, by tumor sample

```
samplesWithMissingGreater50 <- reportmissperrow(pcbilDataMarkerTrimmed)
```

```
##
##  (0,10]  (10,20]  (20,30]  (30,40]  (40,50]  (50,60]  (60,70]  (70,80]
##      94      148       75       39       34       14        6        6
##  (80,90] (90,100]
##       3        1
```

```
#Number of cases in filtered dataset with more than 50% missing data:
length(samplesWithMissingGreater50)
```

```
## [1] 30
```

```
print(samplesWithMissingGreater50)
```

```
## [1] "Hepatocellular Cancer|135"  
## [2] "Hepatocellular Cancer|263"  
## [3] "Hepatocellular Cancer|368"  
## [4] "Pancreas Ac|409"  
## [5] "Pancreas Ac|146"  
## [6] "Pancreas Ac|245"  
## [7] "Hepatocellular Cancer|120"  
## [8] "Hepatocellular Cancer|11"  
## [9] "Hepatocellular Cancer|35"  
## [10] "Hepatocellular Cancer|240"  
## [11] "Hepatocellular Cancer|308"  
## [12] "Hepatocellular Cancer|378"  
## [13] "Hepatocellular Cancer|438"  
## [14] "Perihiliary Ac|239"  
## [15] "Hepatocellular Cancer|155"  
## [16] "Hepatocellular Cancer|90"  
## [17] "Hepatocellular Cancer|408"  
## [18] "Hepatocellular Cancer|21"  
## [19] "Hepatocellular Cancer|436"  
## [20] "Hepatocellular Cancer|242"  
## [21] "Distal Bile Duct Ac|222"  
## [22] "Hepatocellular Cancer|321"  
## [23] "Hepatocellular Cancer|319"  
## [24] "Hepatocellular Cancer|62"  
## [25] "Hepatocellular Cancer|121"  
## [26] "Intrahepatic Cholangiocarcinoma|29"  
## [27] "Pancreas Ac|136"  
## [28] "Hepatocellular Cancer|411"  
## [29] "Hepatocellular Cancer|149"  
## [30] "Gallbladder Ac|422"
```

**Missing values handling strategy, step 2 - remove tumor samples with > 50% missing values.**

```
pcbilDataMarkerSamplesTrimmed <- pcbilDataMarkerTrimmed[!rownames(pcbilDataMarkerTrimmed) %in% samplesWithMissingGreater50, ]
```

**Check the new status of missing values in the marker and sample filtered dataset**

```
pcbilDataMarkerTrimmedMissingValues <- reportmiss(pcbilDataMarkerSamplesTrimmed)
```

```
##      variable nmiss    n propmiss
## 28 clin_diag     0 409      0.00
## 6      ck20      10 409      0.02
## 2      ck7       12 409      0.03
## 7      vim       23 409      0.06
## 5      ck19      38 409      0.09
## 21     p53       38 409      0.09
## 23     ki67      35 409      0.09
## 16     ca125     40 409      0.10
## 20     cdx2     42 409      0.10
## 17     ca19.9    51 409      0.12
## 9      muc2      52 409      0.13
## 10     muc5ac    52 409      0.13
## 8      muc1      56 409      0.14
## 15     pcea      56 409      0.14
## 11     muc6      65 409      0.16
## 4      ck18      69 409      0.17
## 3      ck17      74 409      0.18
## 26     cd56      74 409      0.18
## 1      ck5       91 409      0.22
## 19     wt1cyt    88 409      0.22
## 18     maspin    96 409      0.23
## 14     mcea     98 409      0.24
## 22     p63     104 409      0.25
## 25     chra     145 409      0.35
## 24     smad4    147 409      0.36
## 12     berep4   152 409      0.37
## 13     ema     151 409      0.37
## 27     cd10    153 409      0.37
```

```
# Total percentage missing data the marker and sample filtered dataset: (%)
round(pcbilDataMarkerTrimmedMissingValues, 0)
```

```
## [1] 18
```

```
missmap(pcbilDataMarkerSamplesTrimmed, main = "Missingness map pcbilDataMark
erSamplesTrimmed")
```

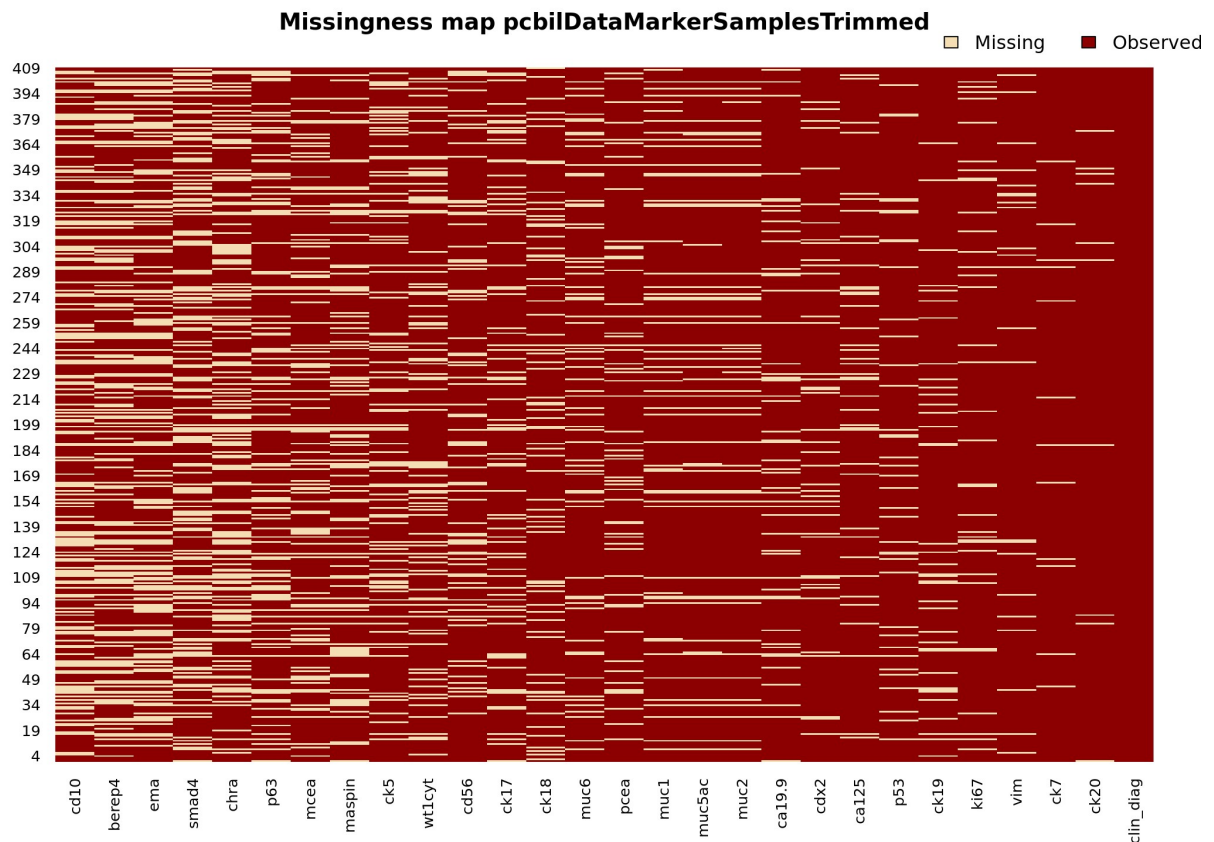

Missing values in the marker and sample filtered dataset, by tumor sample

```
reportmissperrow(pcbilDataMarkerSamplesTrimmed)
```

```
##
##  (0,10]  (10,20]  (20,30]  (30,40]  (40,50]  (50,60]  (60,70]  (70,80]
##      94      148      75      39      34      0      0      0
##  (80,90] (90,100]
##      0      0
```

```
## character(0)
```

Filtering of markers with > 40 % and rows with > 50 % missing data resulted in 18 % improvement of global data coverage

KNN-based imputation of remaining missing values

```
pcbilmatrixImputed <- impute.knn(as.matrix(pcbilDataMarkerSamplesTrimmed[1:27]))
pcbilmatrixImputed <- as.data.frame(pcbilmatrixImputed$data)
pcbilmatrixImputed$clin_diag <- pcbilDataMarkerSamplesTrimmed$clin_diag
```

Security check: missing values in the imputed dataset

```
pcbilmatrixImputedMissingValues <- reportmiss(pcbilmatrixImputed)
```

| ##    | variable  | nmiss | n   | propmiss |
|-------|-----------|-------|-----|----------|
| ## 1  | ck5       | 0     | 409 | 0        |
| ## 2  | ck7       | 0     | 409 | 0        |
| ## 3  | ck17      | 0     | 409 | 0        |
| ## 4  | ck18      | 0     | 409 | 0        |
| ## 5  | ck19      | 0     | 409 | 0        |
| ## 6  | ck20      | 0     | 409 | 0        |
| ## 7  | vim       | 0     | 409 | 0        |
| ## 8  | muc1      | 0     | 409 | 0        |
| ## 9  | muc2      | 0     | 409 | 0        |
| ## 10 | muc5ac    | 0     | 409 | 0        |
| ## 11 | muc6      | 0     | 409 | 0        |
| ## 12 | berep4    | 0     | 409 | 0        |
| ## 13 | ema       | 0     | 409 | 0        |
| ## 14 | mcea      | 0     | 409 | 0        |
| ## 15 | pcea      | 0     | 409 | 0        |
| ## 16 | ca125     | 0     | 409 | 0        |
| ## 17 | ca19.9    | 0     | 409 | 0        |
| ## 18 | maspin    | 0     | 409 | 0        |
| ## 19 | wt1cyt    | 0     | 409 | 0        |
| ## 20 | cdx2      | 0     | 409 | 0        |
| ## 21 | p53       | 0     | 409 | 0        |
| ## 22 | p63       | 0     | 409 | 0        |
| ## 23 | ki67      | 0     | 409 | 0        |
| ## 24 | smad4     | 0     | 409 | 0        |
| ## 25 | chra      | 0     | 409 | 0        |
| ## 26 | cd56      | 0     | 409 | 0        |
| ## 27 | cd10      | 0     | 409 | 0        |
| ## 28 | clin_diag | 0     | 409 | 0        |

```
# Total percentage missing data in imputed dataset: %
round(pcbilDataImputedMissingValues, 0)
```

```
## [1] 0
```

```
missmap(pcbilDataImputed, main = "Missingness map pcbilDataImputed")
```

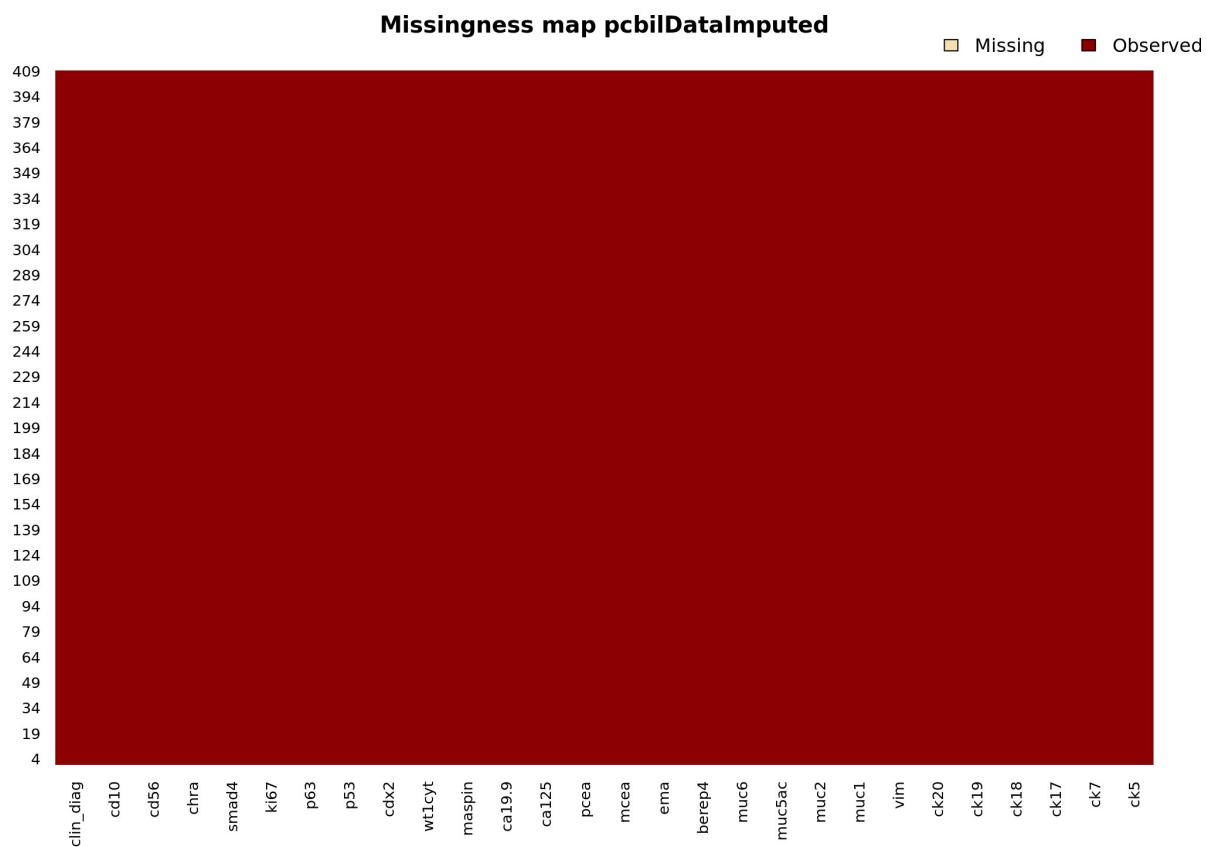

Save imputed data set

```
pcbilDataImputed$pad <- rownames(pcbilDataImputed)
write.csv(pcbilDataImputed, imputedDataFileName, row.names=F, na="")
```

– End of analysis of missing data & imputation –
