# Supplementary material
Source: publisher figshare collection journal article supplement (https://plos.figshare.com/articles/dataset/_/4221999)
Supplement: Supplementary file 1 [file 1 › S1 Table.PDF]

**Supplementary Table 1:** Antibodies (n = 27) and staining protocols (BOND-MAX automated stainer) used for immunohistochemical analysis of the tumor samples.

| Antibody       | Clone       | Dilution | Pretreatment | Manufacturer-product code |
|----------------|-------------|----------|--------------|---------------------------|
| CK5            | XM26        | 1:100    | H2           | NCL-L-CK5                 |
| CK7            | RN7         | 1:200    | H2           | NCL-L-CK7-560             |
| CK17           | E3          | 1:25     | H2           | NCL-CK17                  |
| CK18           | DC-10       | 1:100    | H2           | NCL-CK18                  |
| CK19           | b170        | 1:100    | H2           | NCL-CK19                  |
| CK20           | PW31        | 1:25     | H2           | NCL-L-CK20-561            |
| Vimentin       | V9          | 1:1500   | H1           | Dako-M0725                |
| MUC1           | Ma695       | 1:50     | H1           | NCL-MUC1                  |
| MUC2           | Ccp58       | 1:100    | H2           | NCL-MUC2                  |
| MUC5AC         | CLH2        | 1:50     | H2           | NCL-MUC-5Ac               |
| MUC6           | CLH5        | 1:50     | H2           | NCL-MUC-6                 |
| BerEp4         | Ber-EP4     | 1:100    | Enz 1        | Dako-M0804                |
| EMA            | E29         | 1:100    | H1           | Dako-M0613                |
| M-CEA          | 11-7        | 1:400    | H2           | Dako-M7072                |
| P-CEA          | Polyclonal  | 1:800    | Enz 1        | Dako-A0115                |
| CA125          | OV185:1     | 1:100    | H2           | NCI-L-Ca125               |
| CA19-9         | CA241:5:1:4 | 1:400    | H2           | NCL-L-CA19-9              |
| Maspin         | EAW24       | 1:50     | H2           | NCL-Maspin                |
| WT1            | 6F-H2       | 1:100    | H2           | Dako-M3561                |
| CDX2           | AMT28       | 1:25     | H2           | NCL-CDX2                  |
| p53            | Do-7        | 1:300    | H1           | NCL-L-P53-D07             |
| p63            | DAK-p63     | 1:50     | H2           | Dako-M7317                |
| MIB1/KI-67     | MIB-1       | 1:150    | H2           | Dako-M7240                |
| SMAD4          | B-8         | 1:300    | H2           | Santa Cruz-sc-7966        |
| Chromogranin A | 5H7         | 1:100    | H1           | NCL-CHROM-430             |
| CD56           | CD564       | 1:50     | H2           | NCL-L-CD56-1B6            |
| CD10           | 56C6        | 1:75     | H2           | NCL-L-CD10-270            |

Pretreatments BOND-MAX automated stainer:

H1 = Bond Epitope Retrieval Solution 1 Citrate 20 Minutes

H2 = Bond Epitope Retrieval Solution 2 EDTA 20 Minutes

Enz 1 = 50 µl enzyme + 7 ml Bond enzyme solution

Antibody manufacturers:

NCL: Novocastra Leica Biosystems Ltd, Newcastle Upon Tyne, United Kingdom

Dako: Dako, Glostrup, Denmark

Santa Cruz: Santa Cruz Biotechnology, Inc., Dallas, U.S.A.
