# Supplementary material
Source: publisher figshare collection journal article supplement (https://plos.figshare.com/articles/dataset/_/4221999)
Supplement: Supplementary file 1 [file 1 › S2 File.PDF]

# Immunoprofiling of adenocarcinomas of the pancreatobiliary tree

## Differential expression analysis

Generated on: 2016-03-03 17:28:09

Import required packages

```
# Build pre-requisites
# install.packages("pander")
# install.packages("samr")
# source("http://bioconductor.org/biocLite.R")
# biocLite("multtest")
# biocLite("RankProd")

library(pander)
library(multtest)
```

```
## Loading required package: Biobase
## Loading required package: BiocGenerics
## Loading required package: parallel
##
## Attaching package: 'BiocGenerics'
##
## The following objects are masked from 'package:parallel':
##
##   clusterApply, clusterApplyLB, clusterCall, clusterEvalQ,
##   clusterExport, clusterMap, parApply, parCapply, parLapply,
##   parLapplyLB, parRapply, parSapply, parSapplyLB
##
## The following object is masked from 'package:stats':
##
##   xtabs
##
## The following objects are masked from 'package:base':
##
##   Filter, Find, Map, Position, Reduce, anyDuplicated, append,
##   as.data.frame, as.vector, cbind, colnames, duplicated, eval,
##   evalq, get, intersect, is.unsorted, lapply, mapply, match,
##   mget, order, paste, pmax, pmax.int, pmin, pmin.int, rank,
##   rbind, rep.int, rownames, sapply, setdiff, sort, table,
##   tapply, union, unique, unlist
##
## Welcome to Bioconductor
##
##   Vignettes contain introductory material; view with
##   'browseVignettes()'. To cite Bioconductor, see
##   'citation("Biobase")', and for packages 'citation("pkgname")'.
```

```
library(RankProd)
library(samr)
```

```
## Loading required package: impute
## Loading required package: matrixStats
## matrixStats v0.14.2 (2015-06-23) successfully loaded. See ?matrixStats fo
r help.
##
## Attaching package: 'matrixStats'
##
## The following objects are masked from 'package:Biobase':
##
##   anyMissing, rowMedians
```

Configure file names

```
#myWorkDirectory <- "~/Workspace/research/pcbil/"
myWorkDirectory <- "/home/guest/pcbil/"
clusteredPcbilFileName <- paste(myWorkDirectory, "data_analysis/tidy_datasets/pcbil_clustered.csv", sep="")
```

### Import clustered dataset

```
pcbilDataClustered <- read.csv(file = clusteredPcbilFileName, row.names = 30, colClasses= c(rep("numeric",27), rep("factor",2), "character"), na.strings = "?", quote="\\" )
```

### Alpha (cut-off) value for statistical significance - used in RankProd and SAM

```
alpha <- 0.001
```

### Configure differential diagnosis to evaluate and seeds

```
diffDiagn1 <- c("extrahepatic pancreatobiliary", "extrahepatic pancreatobiliary", "intrahepatic cholangiocarcinoma")
diffDiagn2 <- c("intrahepatic cholangiocarcinoma", "intestinal", "hepatocellular carcinoma")

seeds <- c(1097695, 434343, 12345)
```

### Differential expression analysis - multtest

```

multttestResults <- list()

cont <- 1
while(cont <= length(diffDiagn1)) {

  # Subset tumor clusters to be compared
  pcbilDataTumorClusters <- subset(pcbilDataClustered, pcbilDataClustered$cluster == diffDiagn1[cont] | pcbilDataClustered$cluster == diffDiagn2[cont])

  aMTP <- MTP(X = t(pcbilDataTumorClusters[1:27]), Y = pcbilDataTumorClusters$cluster, test="t.twosamp.unequalvar", robust=TRUE, seed = seeds[cont])

  print(plot(aMTP))

  aMultttestResult <- data.frame(aMTP@rawp[aMTP@adjp <= alpha], aMTP@adjp[aMTP@adjp <= alpha])
  aMultttestResult <- cbind(rownames(aMultttestResult), aMultttestResult)
  meansDiffDiagn1 <- c()
  meansDiffDiagn2 <- c()
  meanDiffs <- c()
  for(marker in aMultttestResult[,1]) {
    meansDiffDiagn1 <- c(meansDiffDiagn1, mean(pcbilDataTumorClusters[pcbilDataTumorClusters$cluster==diffDiagn1[cont], marker]))
    meansDiffDiagn2 <- c(meansDiffDiagn2, mean(pcbilDataTumorClusters[pcbilDataTumorClusters$cluster==diffDiagn2[cont], marker]))
  }
  meanDiffs <- round((meansDiffDiagn1 - meansDiffDiagn2),2)
  aMultttestResult <- cbind(aMultttestResult, meansDiffDiagn1, meansDiffDiagn2, meanDiffs)
  colnames(aMultttestResult) <- c("marker", "raw-pval", "adj-pval", "mean class 1", "mean class 2", "mean diffs")

  aMultttestResult <- aMultttestResult[order(-aMultttestResult[6]), ]
  rownames(aMultttestResult) <- NULL

  caption_str <- paste("class 1: ", diffDiagn1[cont], " | class 2: ", diffDiagn2[cont], sep="")
  pandoc.table(aMultttestResult, caption= caption_str, style="grid", split.tables=100, justify="right")

  multttestResults <- append(multttestResults, list(as.vector(aMultttestResult[,1])))

  cont <- cont + 1
}

```

```

## running bootstrap...
## iteration = 100 200 300 400 500 600 700 800 900 1000

```

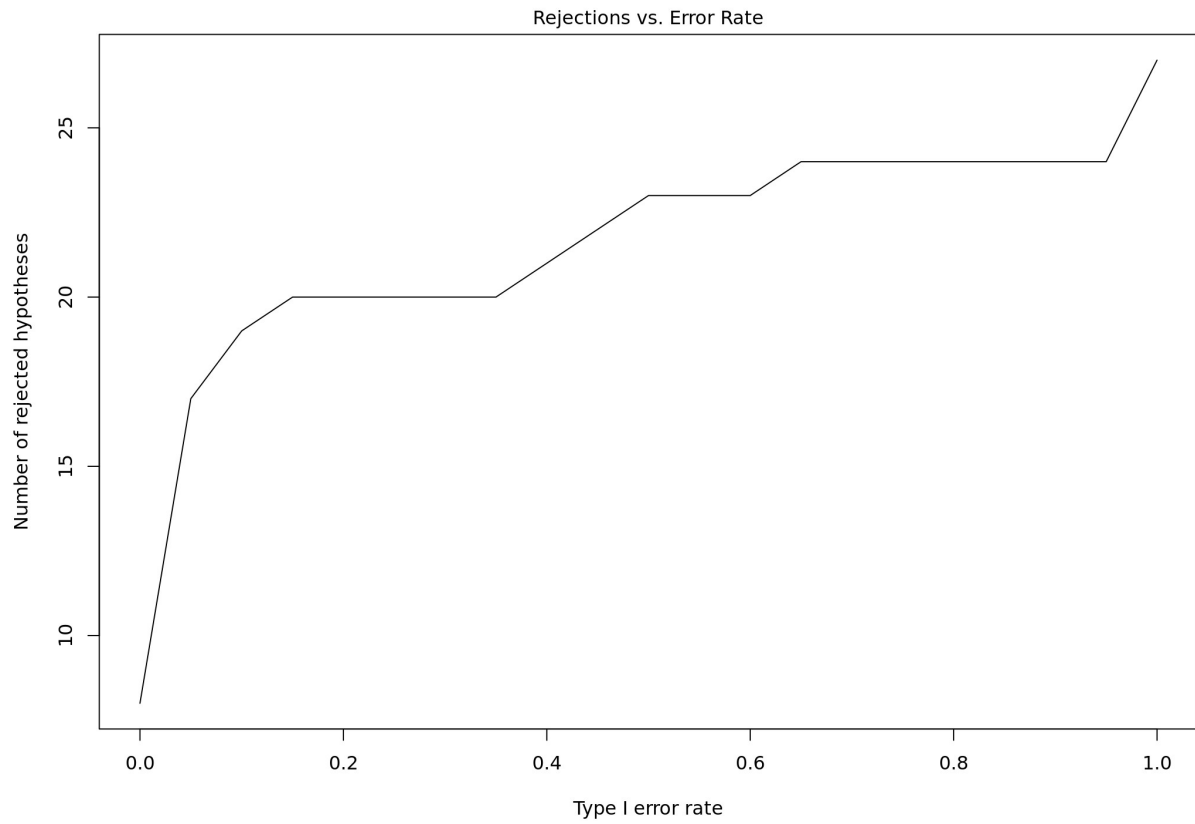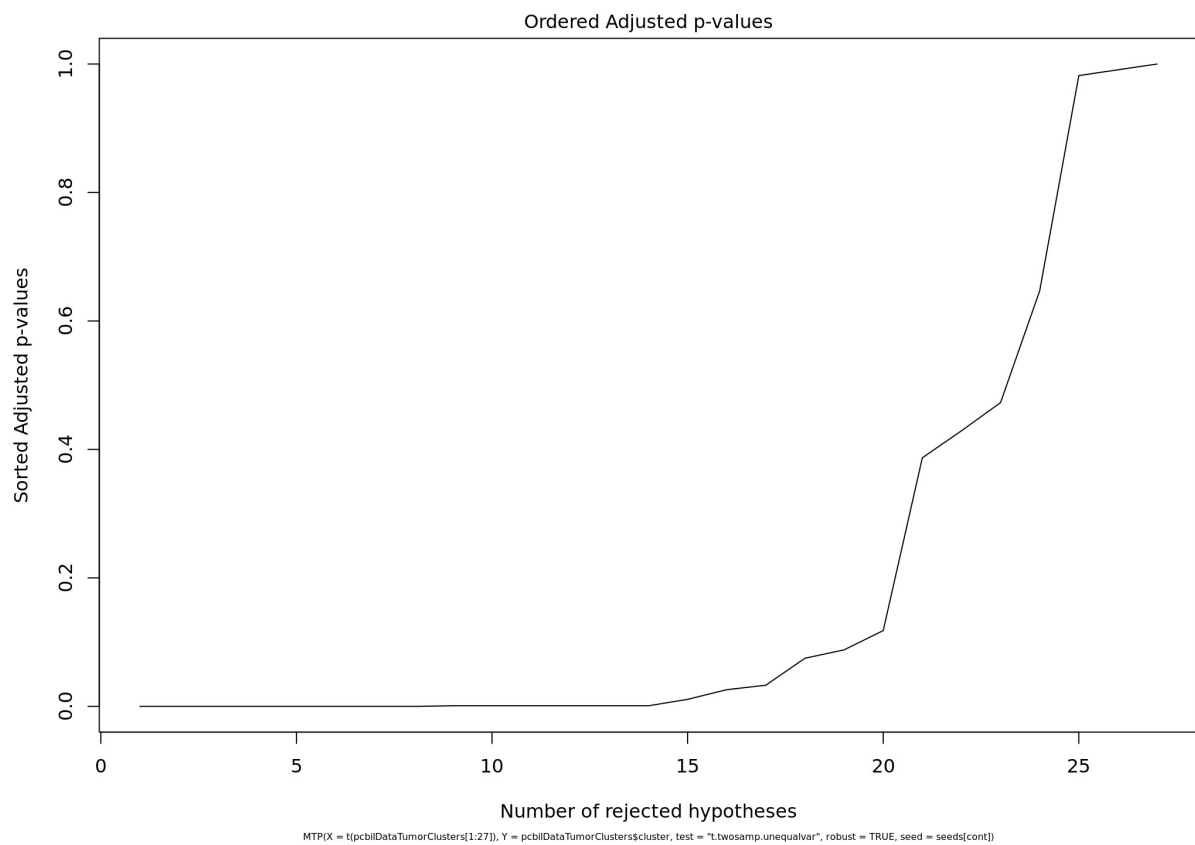

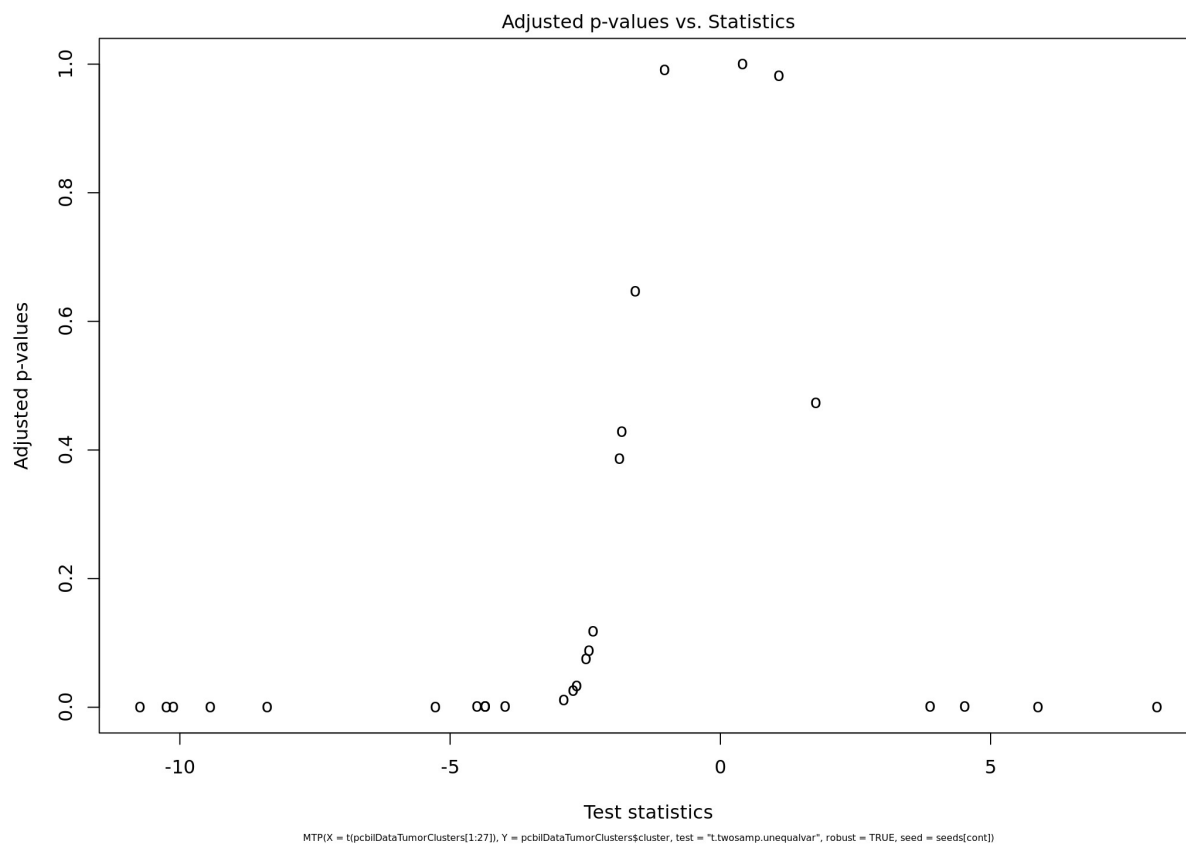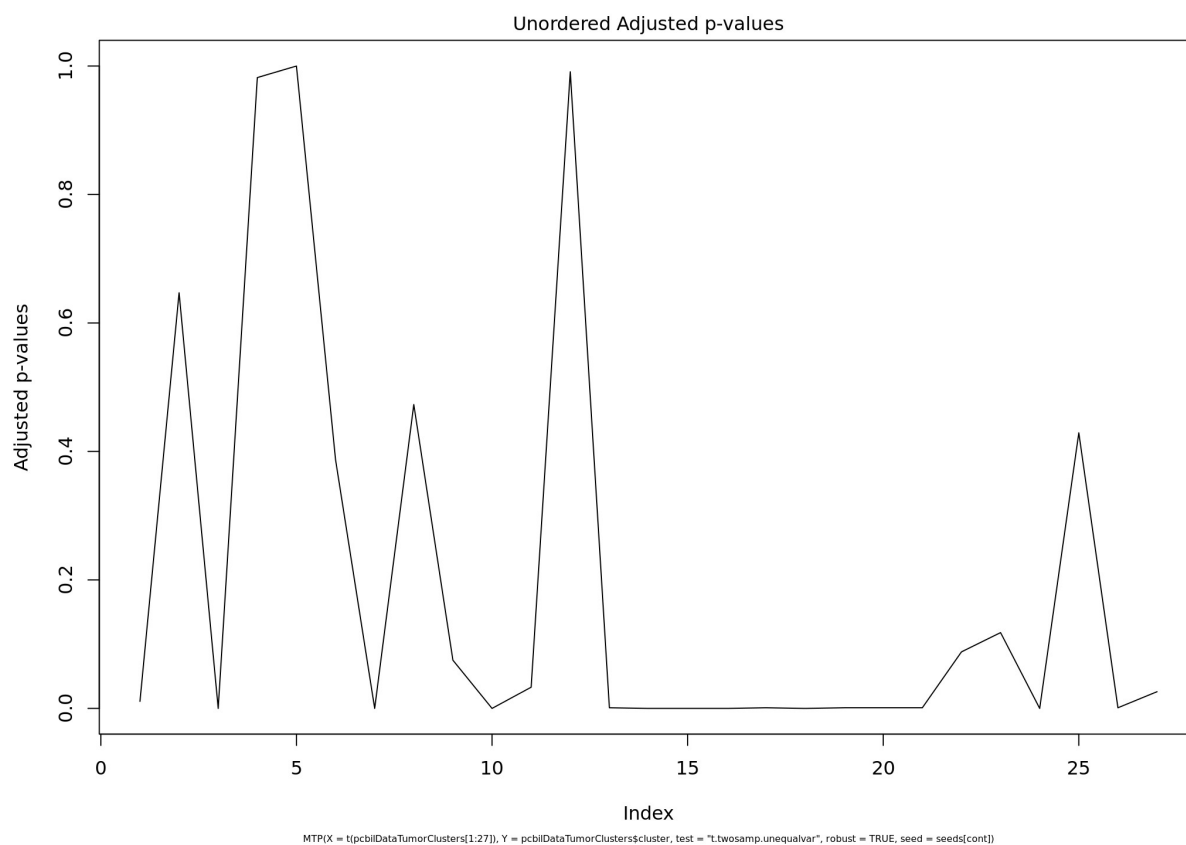

```

## NULL
##
##
## +-----+-----+-----+-----+-----+
-----+
## | marker | raw-pval | adj-pval | mean class 1 | mean class 2
| mean diffs |
## +=====+=====+=====+=====+=====+
=====+
## | maspin | 0 | 0 | 73.85 | 22.18
| 51.67 |
## +-----+-----+-----+-----+-----+
-----+
## | ca125 | 0 | 0 | 52.42 | 4.085
| 48.33 |
## +-----+-----+-----+-----+-----+
-----+
## | mcea | 0 | 0 | 48.53 | 3.349
| 45.19 |
## +-----+-----+-----+-----+-----+
-----+
## | muc5ac | 0 | 0 | 51.72 | 7.377
| 44.34 |
## +-----+-----+-----+-----+-----+
-----+
## | ck17 | 0 | 0 | 33.68 | 6.428
| 27.26 |
## +-----+-----+-----+-----+-----+
-----+
## | p53 | 0 | 0.001 | 42.23 | 18
| 24.22 |
## +-----+-----+-----+-----+-----+
-----+
## | ca19.9 | 0 | 0.001 | 75.54 | 51.99
| 23.55 |
## +-----+-----+-----+-----+-----+
-----+
## | pcea | 0 | 0 | 87.7 | 66.18
| 21.52 |
## +-----+-----+-----+-----+-----+
-----+
## | ema | 0 | 0.001 | 91.12 | 79.47
| 11.65 |
## +-----+-----+-----+-----+-----+
-----+
## | cdx2 | 0 | 0.001 | 16.02 | 6.353
| 9.67 |
## +-----+-----+-----+-----+-----+
-----+
## | cd56 | 0 | 0.001 | 0.638 | 10.26
| -9.63 |
## +-----+-----+-----+-----+-----+

```

```

-----+
## |   wt1cyt |           0 |         0.001 |           3.82 |           15.67
|   -11.85 |
## +-----+-----+-----+-----+-----+-----+
-----+
## |       vim |           0 |           0 |          15.93 |           42.93
|      -27 |
## +-----+-----+-----+-----+-----+-----+
-----+
## |     smad4 |           0 |           0 |          41.98 |           85.08
|    -43.1 |
## +-----+-----+-----+-----+-----+-----+
-----+
##
## Table: class 1: extrahepatic pancreatobiliary | class 2: intrahepatic cho
langiocarcinoma
##
## running bootstrap...
## iteration = 100 200 300 400 500 600 700 800 900 1000

```

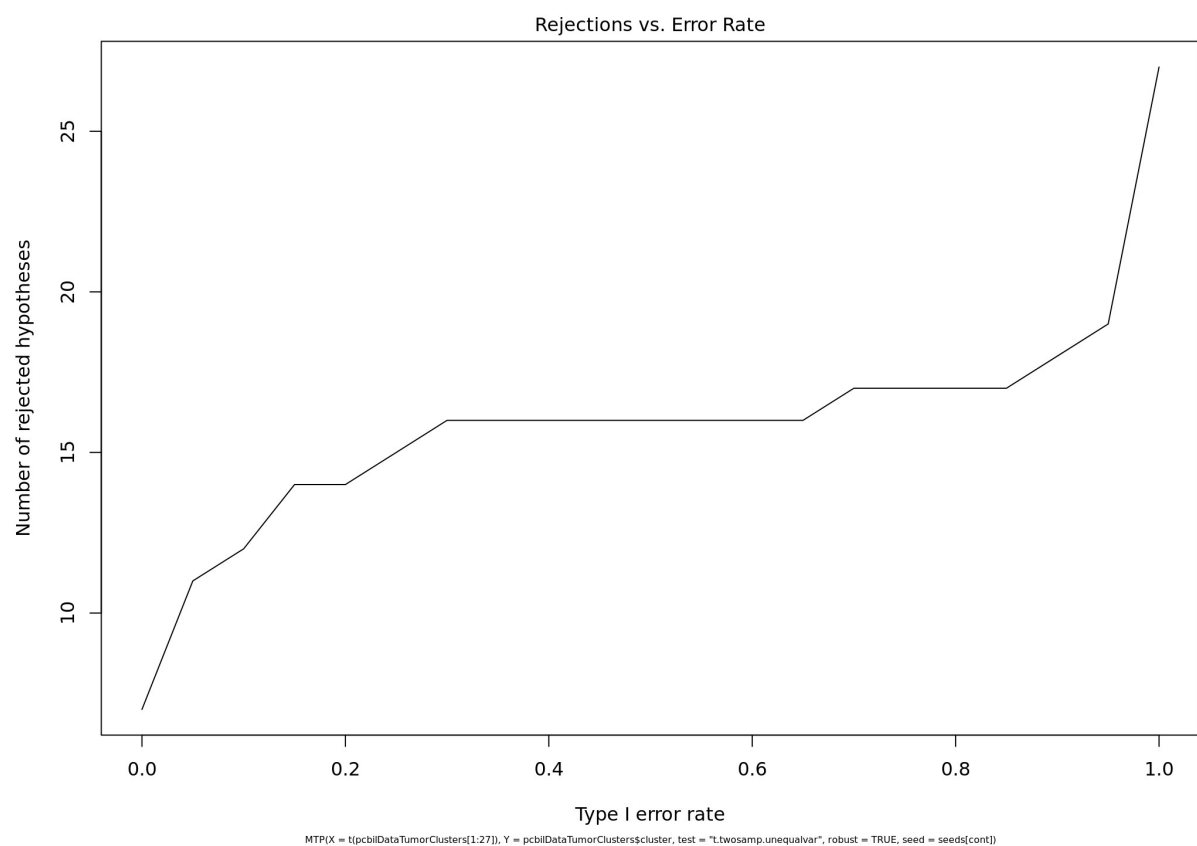

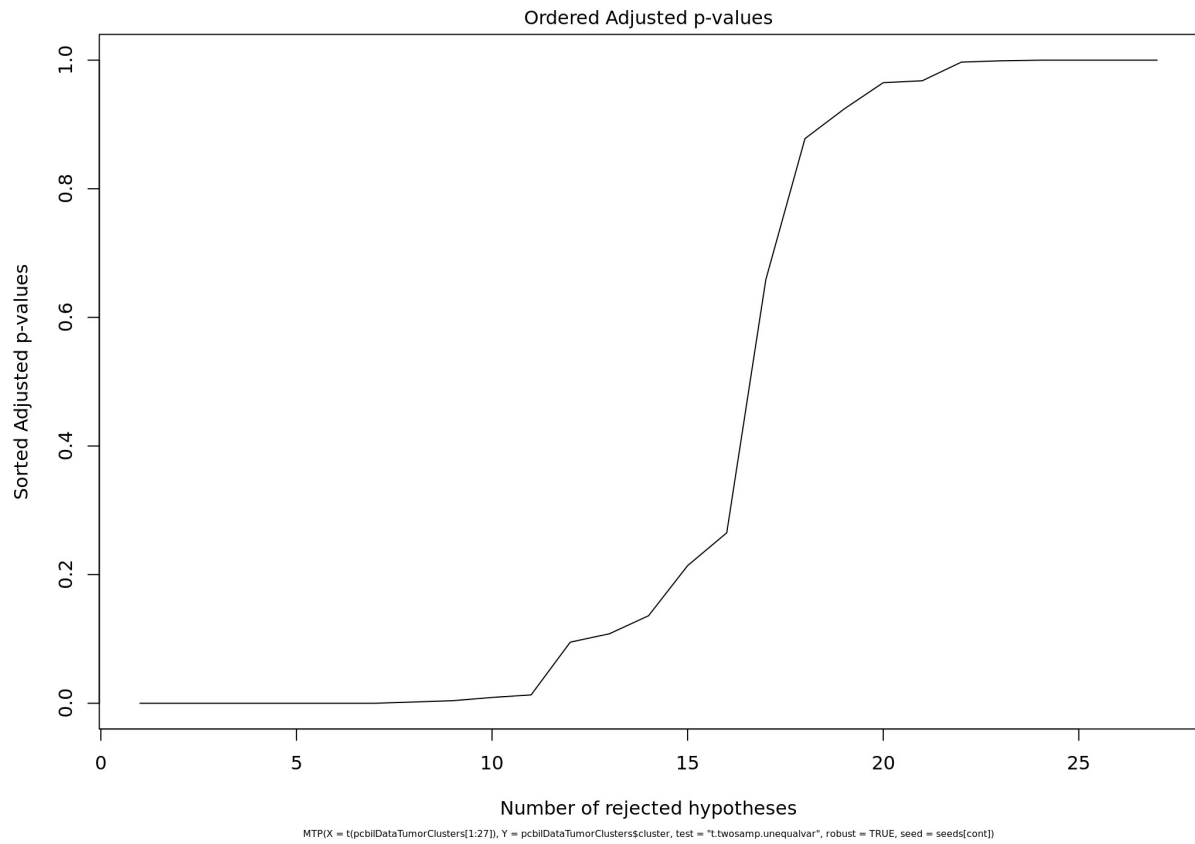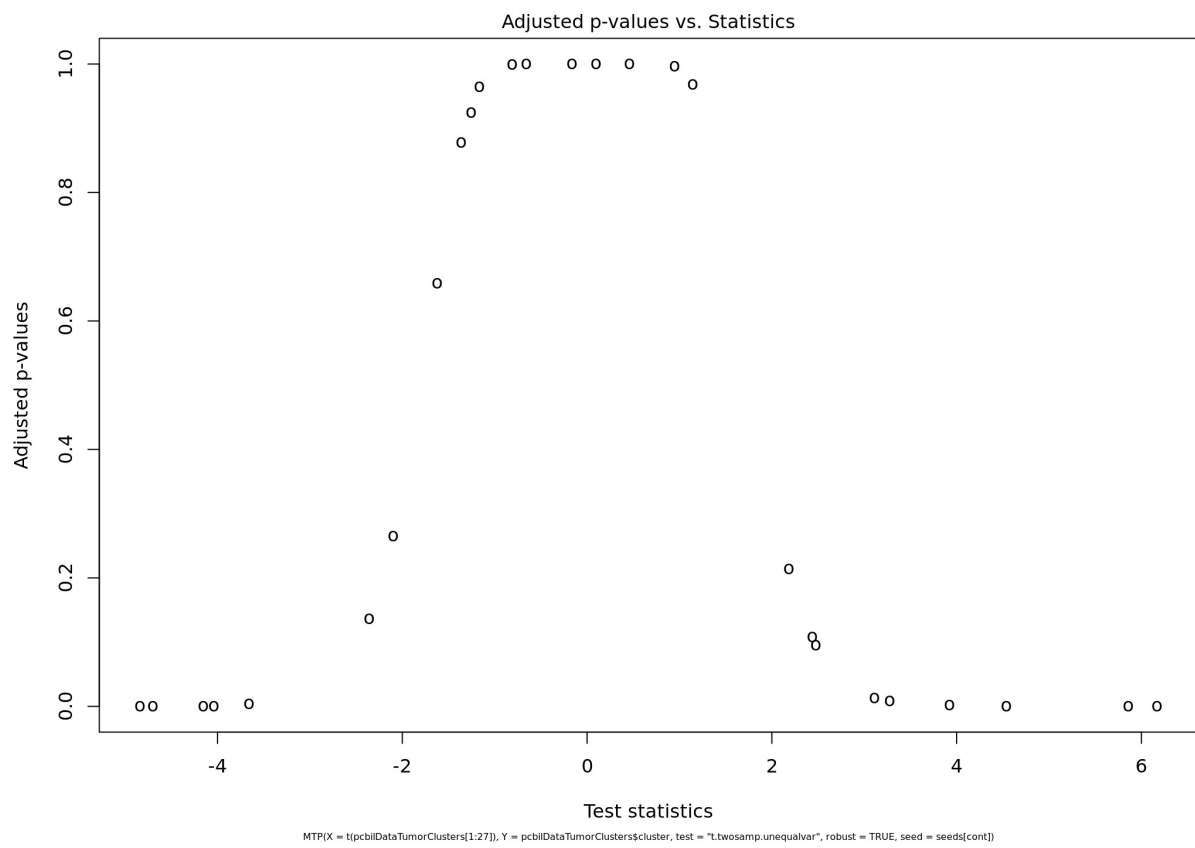

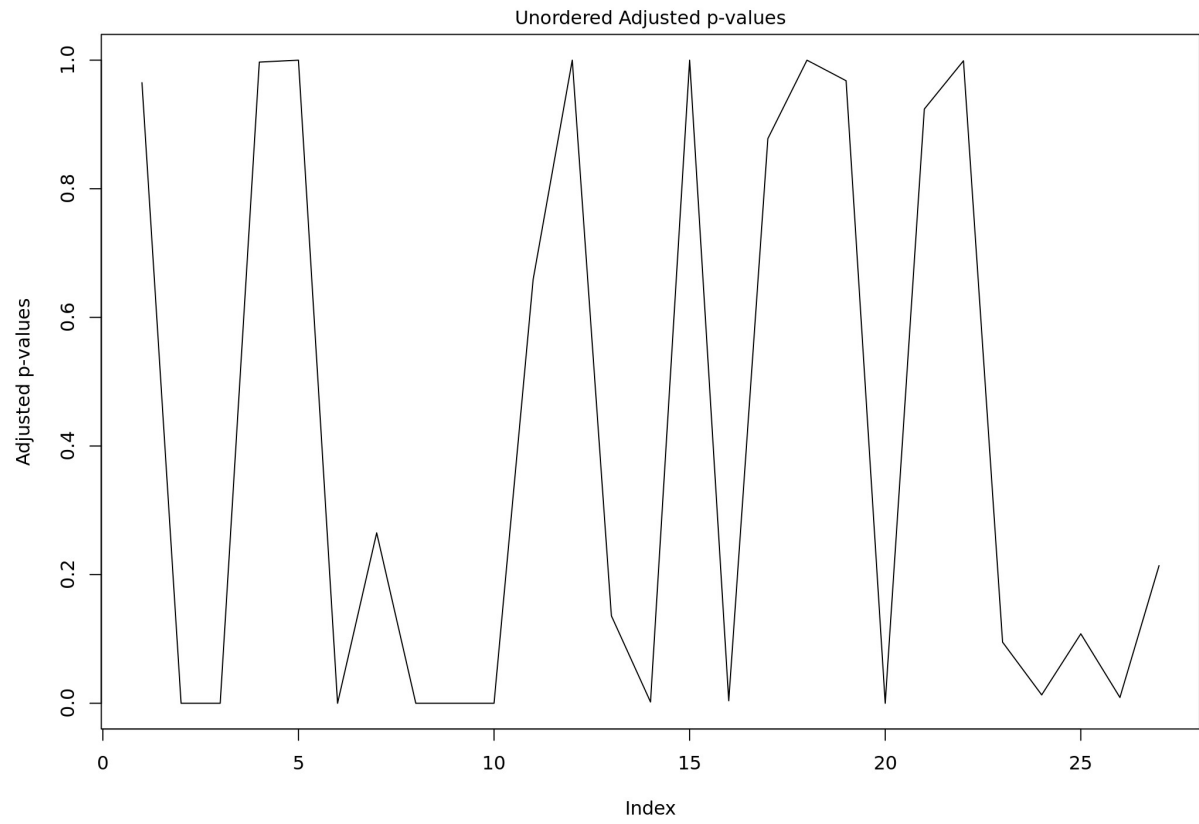

```

## NULL
##
##
## +-----+-----+-----+-----+-----+
-----+
## | marker | raw-pval | adj-pval | mean class 1 | mean class 2
| mean diffs |
## +=====+=====+=====+=====+=====+
=====+
## | ck7 | 0 | 0 | 88.43 | 46.28
| 42.15 |
## +-----+-----+-----+-----+-----+
-----+
## | muc1 | 0 | 0 | 61 | 28.26
| 32.74 |
## +-----+-----+-----+-----+-----+
-----+
## | muc5ac | 0 | 0 | 51.72 | 22.96
| 28.76 |
## +-----+-----+-----+-----+-----+
-----+
## | ck17 | 0 | 0 | 33.68 | 8.125
| 25.56 |
## +-----+-----+-----+-----+-----+
-----+
## | muc2 | 0 | 0 | 2.026 | 32.15
| -30.13 |
## +-----+-----+-----+-----+-----+
-----+
## | ck20 | 0 | 0 | 7.17 | 58.75
| -51.58 |
## +-----+-----+-----+-----+-----+
-----+
## | cdx2 | 0 | 0 | 16.02 | 75.08
| -59.05 |
## +-----+-----+-----+-----+-----+
-----+
##
## Table: class 1: extrahepatic pancreatobiliary | class 2: intestinal
##
## running bootstrap...
## iteration = 100 200 300 400 500 600 700 800 900 1000

```

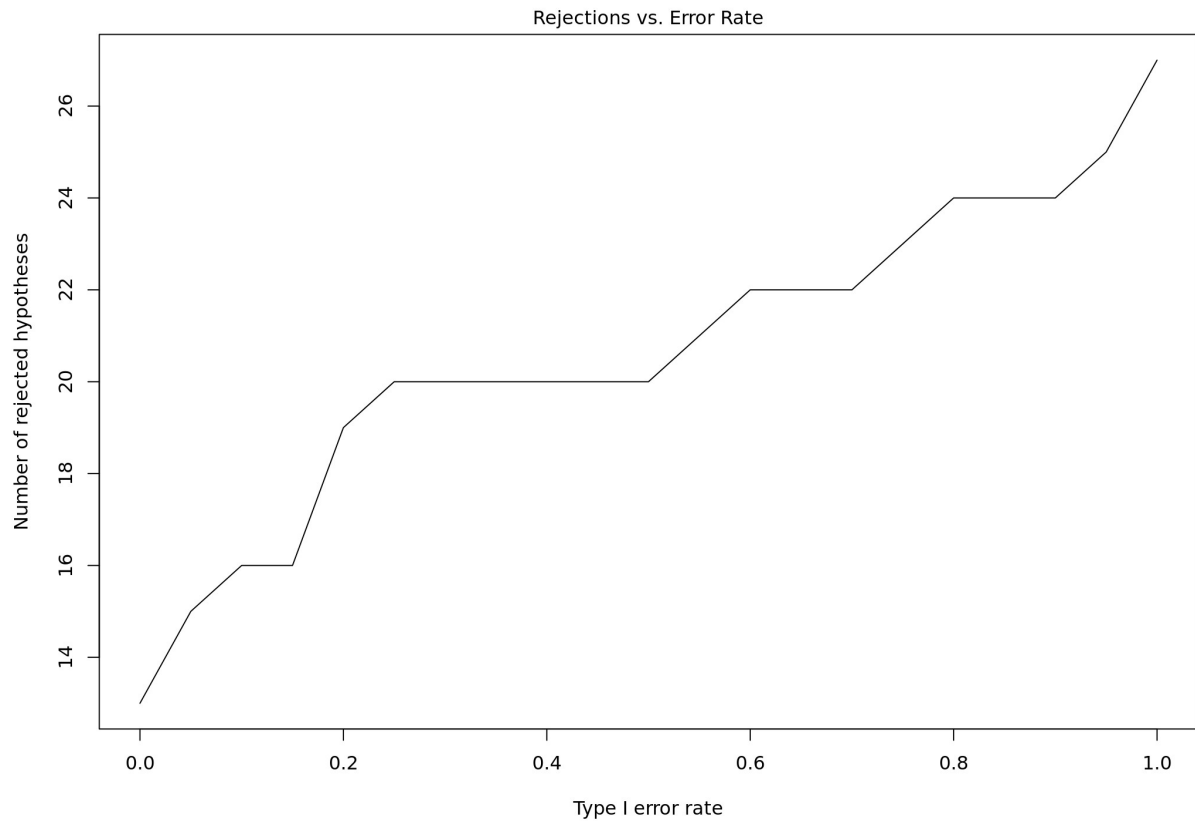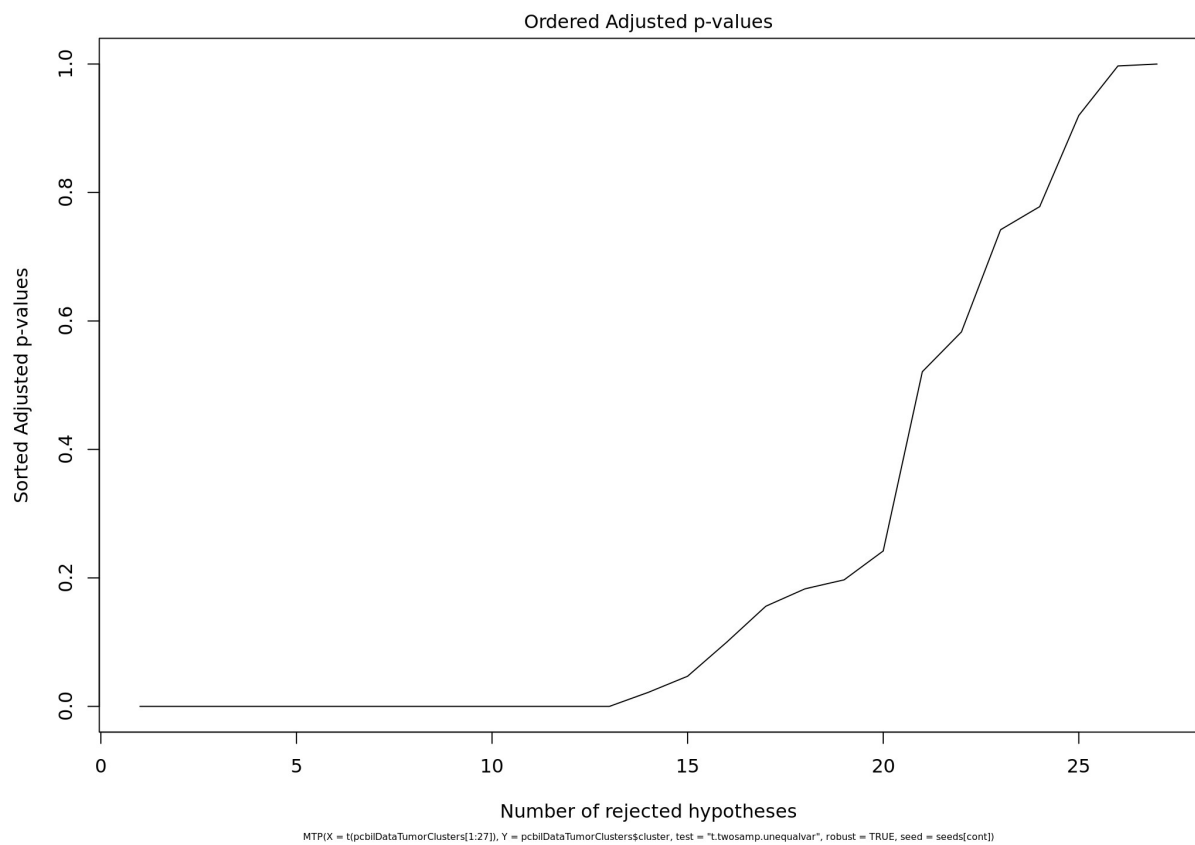

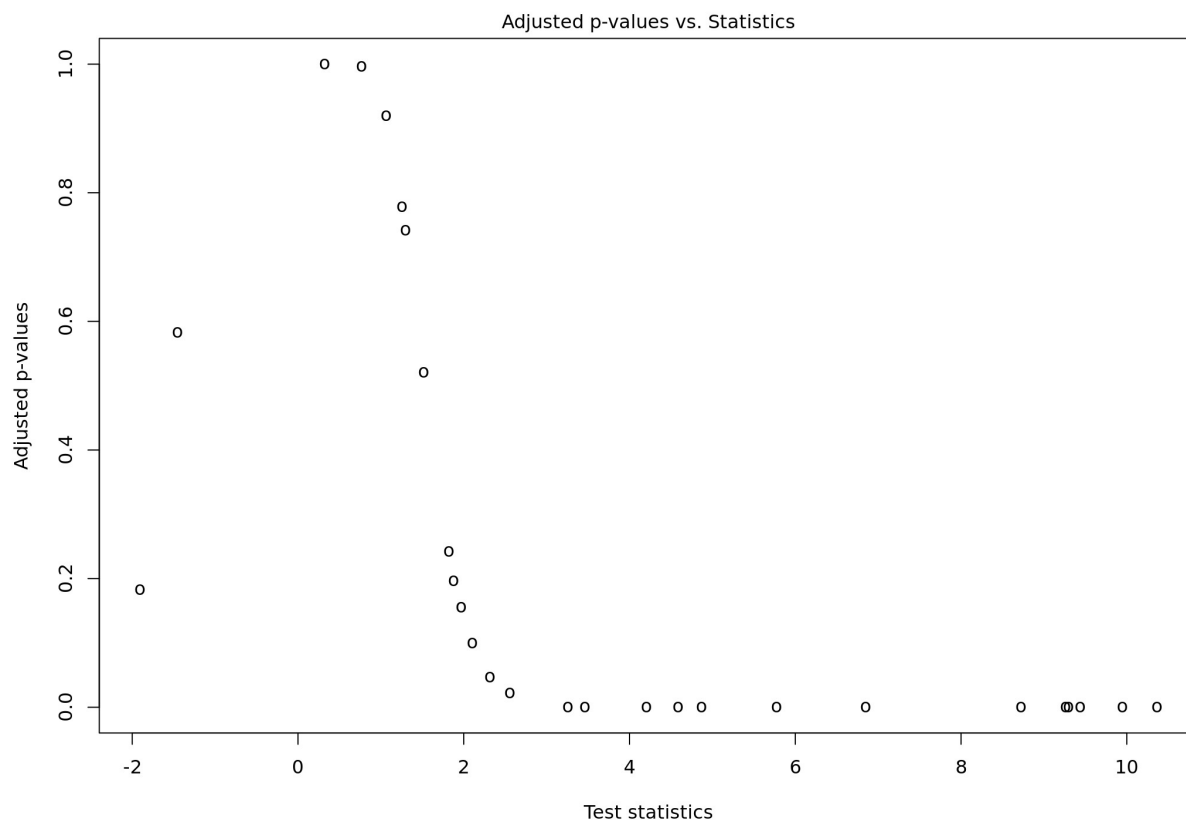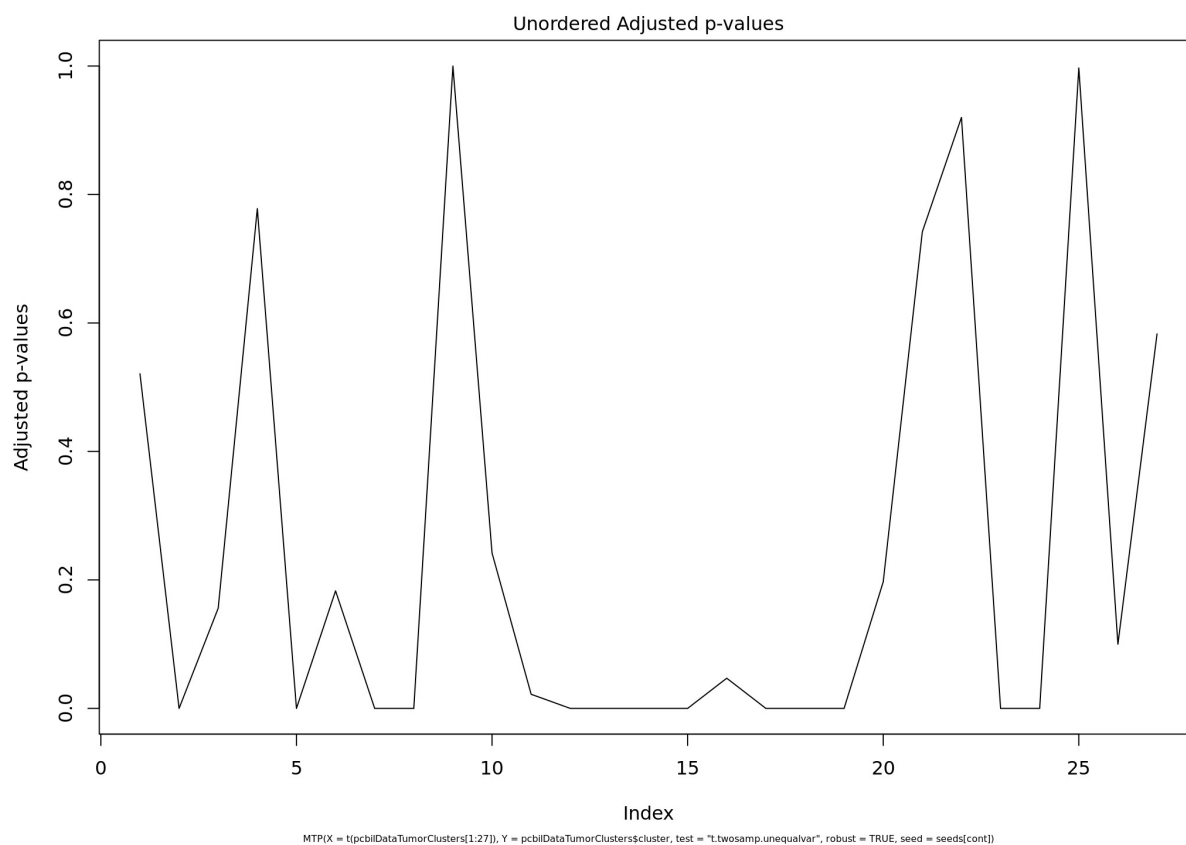

```

## NULL
##
##
## +-----+-----+-----+-----+-----+
-----+
## | marker | raw-pval | adj-pval | mean class 1 | mean class 2
| mean diffs |
## +=====+=====+=====+=====+=====+
=====+
## | ck19 | 0 | 0 | 92.4 | 6.077
| 86.32 |
## +-----+-----+-----+-----+-----+
-----+
## | berep4 | 0 | 0 | 75.94 | 1.119
| 74.82 |
## +-----+-----+-----+-----+-----+
-----+
## | ck7 | 0 | 0 | 80.13 | 7.066
| 73.07 |
## +-----+-----+-----+-----+-----+
-----+
## | ema | 0 | 0 | 79.47 | 12.32
| 67.15 |
## +-----+-----+-----+-----+-----+
-----+
## | muc1 | 0 | 0 | 67.8 | 5.84
| 61.95 |
## +-----+-----+-----+-----+-----+
-----+
## | ca19.9 | 0 | 0 | 51.99 | 0.6473
| 51.34 |
## +-----+-----+-----+-----+-----+
-----+
## | vim | 0 | 0 | 42.93 | 4.222
| 38.71 |
## +-----+-----+-----+-----+-----+
-----+
## | pcea | 0 | 0 | 66.18 | 44.09
| 22.09 |
## +-----+-----+-----+-----+-----+
-----+
## | maspin | 0 | 0 | 22.18 | 3.223
| 18.96 |
## +-----+-----+-----+-----+-----+
-----+
## | wt1cyt | 0 | 0 | 15.67 | 1.015
| 14.66 |
## +-----+-----+-----+-----+-----+
-----+
## | smad4 | 0 | 0 | 85.08 | 72.72
| 12.36 |
## +-----+-----+-----+-----+-----+

```

```

-----+
## |      ki67 |      0 |      0 |      31.35 |      21.57
|      9.78 |
## +-----+-----+-----+-----+-----+-----+
-----+
## |      mcea |      0 |      0 |      3.349 |      0.4095
|      2.94 |
## +-----+-----+-----+-----+-----+-----+
-----+
##
## Table: class 1: intrahepatic cholangiocarcinoma | class 2: hepatocellular carcinoma

```

## Differential expression analysis - RankProd

```

rankProdResults <- list()

cont <- 1
while(cont <= length(diffDiagn1)) {

  # Subset tumor clusters to be compared
  pcbilDataTumorClusters <- subset(pcbilDataClustered, pcbilDataClustered$cluster == diffDiagn1[cont] | pcbilDataClustered$cluster == diffDiagn2[cont])

  subsetClasses <- pcbilDataTumorClusters$cluster == diffDiagn1[cont]
  subsetClasses <- as.numeric(subsetClasses)

  aRP <- RP(t(pcbilDataTumorClusters[1:27]), subsetClasses, num.perm=100, logged=FALSE, plot=FALSE, rand=seeds[cont])

  print(plotRP(aRP, cutoff= alpha))

  tg <- topGene(aRP,cutoff= alpha,method="pfp",logged=FALSE, gene.names=colnames(pcbilDataTumorClusters)[1:27])
  print(tg)
  print(paste("class 1: ", diffDiagn1[cont], " | class 2: ", diffDiagn2[cont], sep=""))

  rankProdResults <- append(rankProdResults, list(c(rownames(tg[[1]]), rownames(tg[[2]]))))

  cont <- cont + 1
}

```

```

## Rank Product analysis for two-class case
##
## Starting 100 permutations...
## Computing pfp ..
## Outputting the results ..

```

### Identification of Up-regulated genes under class 2

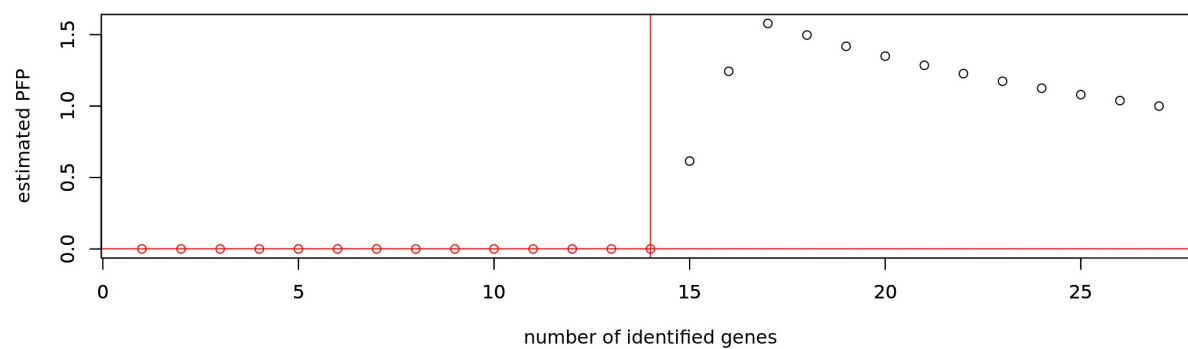

### Identification of down-regulated genes under class 2

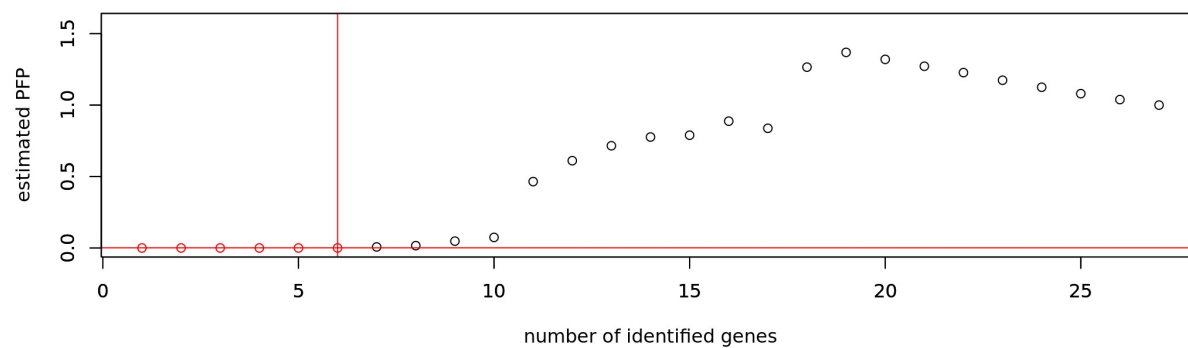

```
## NULL
## Table1: Genes called significant under class1 < class2
##
## Table2: Genes called significant under class1 > class2
##
## $Table1
##      gene.index  RP/Rsum  FC:(class1/class2)  pfp  P.value
## ca125          16  4.6318                0.0779    0      0
## muc5ac          10  5.0123                0.1426    0      0
## mcea           14  5.1853                0.0690    0      0
## muc2            9  5.7301                0.0601    0      0
## ck17            3  6.1118                0.1908    0      0
## chra           25  6.1808                0.2226    0      0
## cdx2           20  6.1881                0.3965    0      0
## maspin          18  6.4716                0.3004    0      0
## p63            22  6.6425                0.3675    0      0
## ck5             1  7.0921                0.2391    0      0
## cd10           27  7.1886                1.0219    0      0
## ck20            6  7.2860                0.4359    0      0
## p53            21  7.3868                0.4263    0      0
## muc6           11  7.6806                1.0934    0      0
##
## $Table2
##      gene.index  RP/Rsum  FC:(class1/class2)  pfp  P.value
## cd56           26  3.0509                16.0889    0      0
## vim             7  3.8711                 2.6945    0      0
## wt1cyt          19  3.9181                 4.1034    0      0
## smad4           24  4.0844                 2.0266    0      0
## muc1            8  6.9345                 1.1113    0      0
## ck18            4  7.8315                 1.0137    0      0
##
## [1] "class 1: extrahepatic pancreatobiliary | class 2: intrahepatic cholangiocarcinoma"
## Rank Product analysis for two-class case
##
## Starting 100 permutations...
## Computing pfp ..
## Outputting the results ..
```

### Identification of Up-regulated genes under class 2

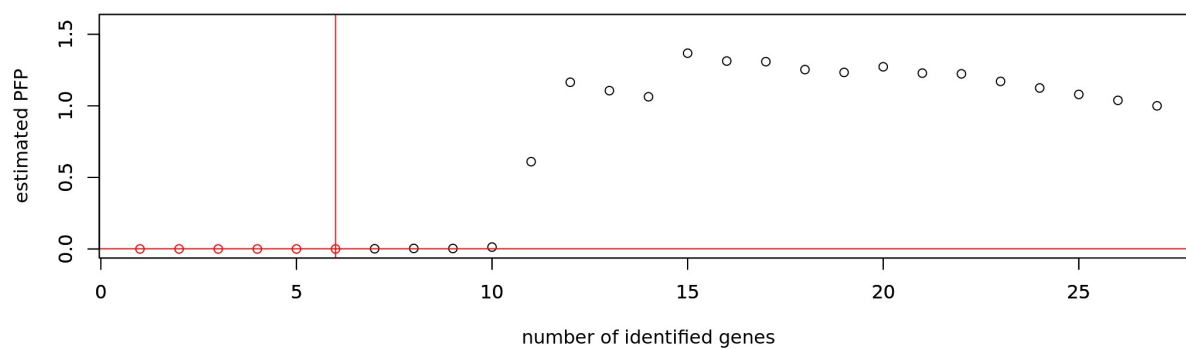

### Identification of down-regulated genes under class 2

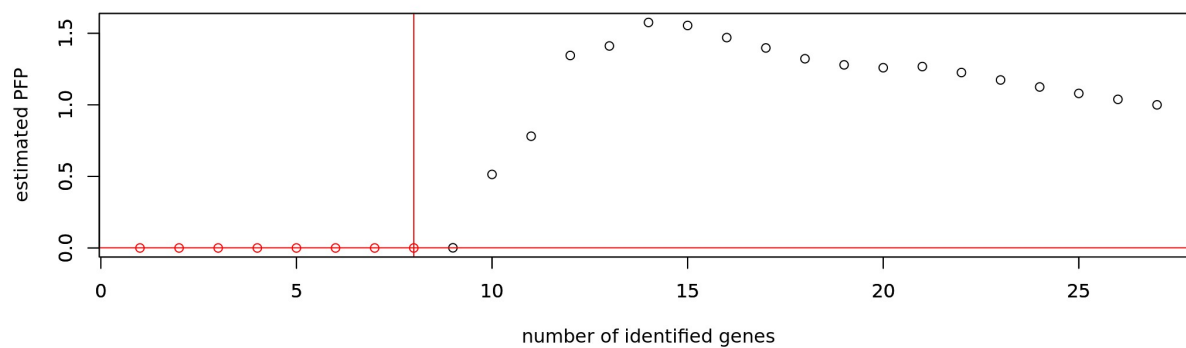

```

## NULL
## Table1: Genes called significant under class1 < class2
##
## Table2: Genes called significant under class1 > class2
##
## $Table1
##      gene.index  RP/Rsum  FC:(class1/class2)  pfp  P.value
## vim            7  4.5681                0.0392  0      0
## ck17           3  4.5926                0.2412  0      0
## muc1           8  5.3751                0.4633  0      0
## ca125          16  5.8329                0.4464  0      0
## muc5ac         10  6.1011                0.4439  0      0
## ck7            2  6.4176                0.5234  0      0
##
## $Table2
##      gene.index  RP/Rsum  FC:(class1/class2)  pfp  P.value
## ck20           6  3.9158                8.1943  0      0
## cd56          26  3.9433                6.0285  0      0
## muc2           9  4.2625               15.8726  0      0
## cdx2          20  5.0283                4.6856  0      0
## chra          25  5.1662                2.4745  0      0
## wt1cyt        19  6.8115                1.3162  0      0
## cd10          27  7.0140                2.7287  0      0
## smad4         24  7.1322                1.6647  0      0
##
## [1] "class 1: extrahepatic pancreatobiliary | class 2: intestinal"
## Rank Product analysis for two-class case
##
## Starting 100 permutations...
## Computing pfp ..
## Outputting the results ..

```

### Identification of Up-regulated genes under class 2

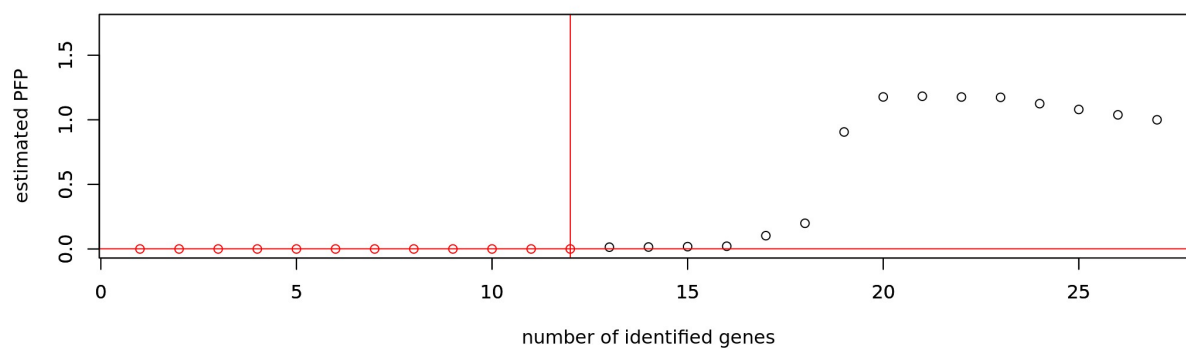

### Identification of down-regulated genes under class 2

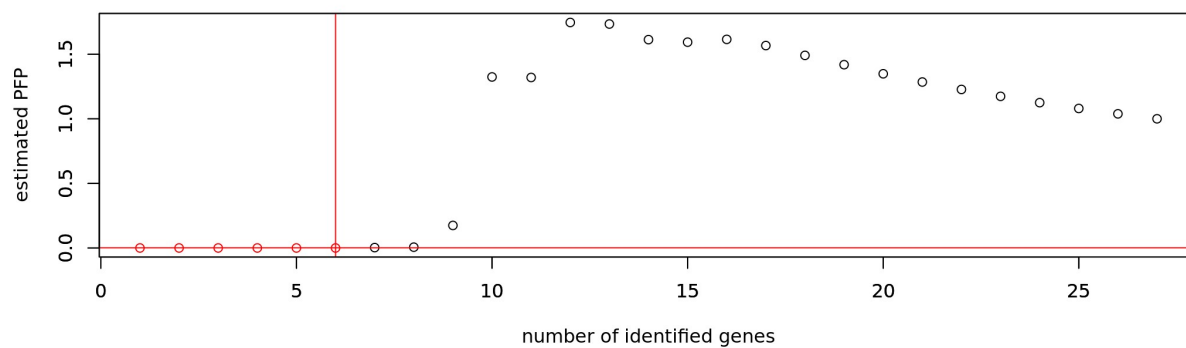

```
## NULL
## Table1: Genes called significant under class1 < class2
##
## Table2: Genes called significant under class1 > class2
##
## $Table1
##      gene.index RP/Rsum FC:(class1/class2) pfp P.value
## chra           25  5.1464                0.0000  0      0
## berep4          12  5.1851                0.0147  0      0
## ca19.9           17  5.3694                0.0125  0      0
## muc1             8  5.6560                0.0861  0      0
## ck19             5  5.6654                0.0658  0      0
## ca125            16  5.7073                0.0160  0      0
## vim              7  6.0833                0.0983  0      0
## mcea            14  6.2989                0.1223  0      0
## wt1cyt           19  6.3333                0.0648  0      0
## cdx2             20  6.8809                0.1338  0      0
## maspin           18  6.9948                0.1453  0      0
## ck7              2  7.0633                0.0882  0      0
##
## $Table2
##      gene.index RP/Rsum FC:(class1/class2) pfp P.value
## ck20             6  2.9247                2.1025  0      0
## ck18             4  3.4015                0.9556  0      0
## cd10            27  3.4277                1.9647  0      0
## smad4           24  3.9683                0.8547  0      0
## ki67            23  4.5387                0.6879  0      0
## pcea            15  5.2410                0.6662  0      0
##
## [1] "class 1: intrahepatic cholangiocarcinoma | class 2: hepatocellular c
arcinoma"
```

## Differential expression analysis - SAM

```

samResults <- list()

cont <- 1
while(cont <= length(diffDiagn1)) {

  # Subset tumor clusters to be compared
  pcbilDataTumorClusters <- subset(pcbilDataClustered, pcbilDataClustered$cluster == diffDiagn1[cont] | pcbilDataClustered$cluster == diffDiagn2[cont])

  subsetClasses <- pcbilDataTumorClusters$cluster == diffDiagn1[cont]
  subsetClasses <- as.numeric(subsetClasses)
  subsetClasses <- subsetClasses + 1

  aSAM <- SAM(t(pcbilDataTumorClusters[1:27]), subsetClasses, resp.type="Two class unpaired", testStatistic = "wilcoxon", regression.method= "ranks" ,nperms = 1000, genenames = colnames(pcbilDataTumorClusters)[1:27], fdr.output = alpha)

  print(plot(aSAM))
  print(aSAM)
  print(paste("class 1: ", diffDiagn1[cont], " | class 2: ", diffDiagn2[cont], sep=""))

  samResults <- append(samResults, list(c(aSAM$siggenes.table$genes.up[,1], aSAM$siggenes.table$genes.lo[,1])) )

  cont <- cont + 1
}

```

```
## Warning in factorial(length(y)): value out of range in 'gammafn'
```

```

## perm= 1 ... 1000
##
## Computing delta table
## 1 ... 50

```

```
## NULL
## Call:
## SAM(x = t(pcbilDataTumorClusters[1:27]), y = subsetClasses, resp.type =
"Two class unpaired",
##     genenames = colnames(pcbilDataTumorClusters)[1:27], nperms = 1000,
##     testStatistic = "wilcoxon", regression.method = "ranks",
##     fdr.output = alpha)
##
## Genes up
##      Gene ID Gene Name Score(d) Numerator(r) Denominator(s+s0)
## [1,] mcea      14      5.369      6649.5      1238.504
## [2,] muc5ac    10      5.124      6346.5      1238.504
## [3,] ca125     16      5.058      6264.5      1238.504
## [4,] maspin    18      4.719      5844.5      1238.504
## [5,] ck17      3       4.193      5192.5      1238.504
## [6,] pcea      15      2.633      3261.5      1238.504
## [7,] ca19.9    17      2.252      2789.5      1238.504
## [8,] cdx2      20      2.176      2695       1238.504
## [9,] ema       13      2.174      2693       1238.504
## [10,] p53      21      1.989      2463       1238.504
## [11,] ck5       1      1.449      1795       1238.504
## [12,] cd10     27      1.358      1682.5     1238.504
## [13,] muc6     11      1.328      1645       1238.504
## [14,] muc2      9      1.241      1537.5     1238.504
##      Fold Change q-value(%)
## [1,] 14.494      0
## [2,] 7.011       0
## [3,] 12.83       0
## [4,] 3.329       0
## [5,] 5.24        0
## [6,] 1.325       0
## [7,] 1.453       0
## [8,] 2.522       0
## [9,] 1.147       0
## [10,] 2.346      0
## [11,] 4.182      0
## [12,] 0.979      0
## [13,] 0.915      0
## [14,] 16.626     0
##
## Genes down
##      Gene ID Gene Name Score(d) Numerator(r) Denominator(s+s0) Fold Chang
e
## [1,] smad4    24      -4.04      -5003      1238.504      0.49
3
## [2,] vim      7      -2.941      -3642      1238.504      0.37
1
## [3,] wt1cyt   19      -2.261      -2800.5     1238.504      0.24
4
## [4,] cd56     26      -1.941      -2404      1238.504      0.06
2
## [5,] muc1      8      -0.884      -1094.5     1238.504      0.
```

```

9
## [6,] ck18      4      -0.542   -671      1238.504      0.98
7
##      q-value(%)
## [1,] 0
## [2,] 0
## [3,] 0
## [4,] 0
## [5,] 0
## [6,] 0.741
## [1] "class 1: extrahepatic pancreatobiliary | class 2: intrahepatic chola
ngiocarcinoma"

```

```

## Warning in factorial(length(y)): value out of range in 'gammafn'

```

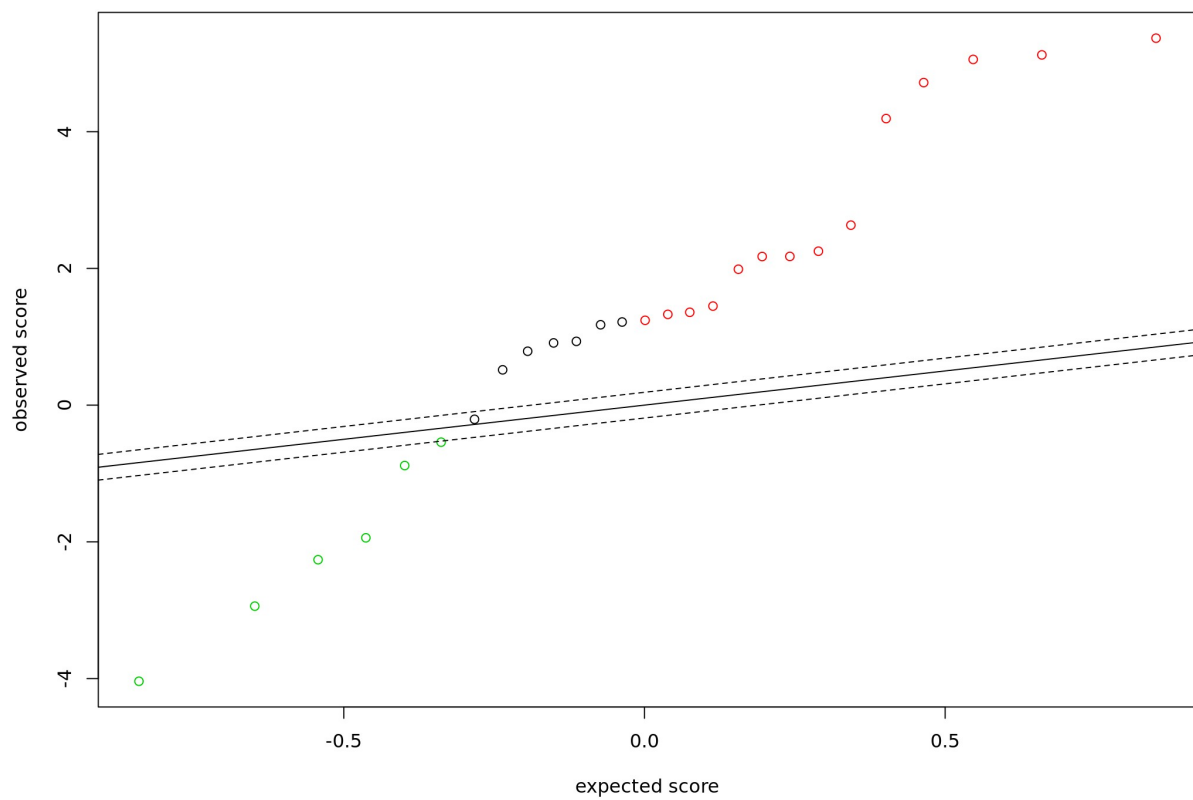

```

## perm= 1 ...1000
##
## Computing delta table
## 1 ... 50

```

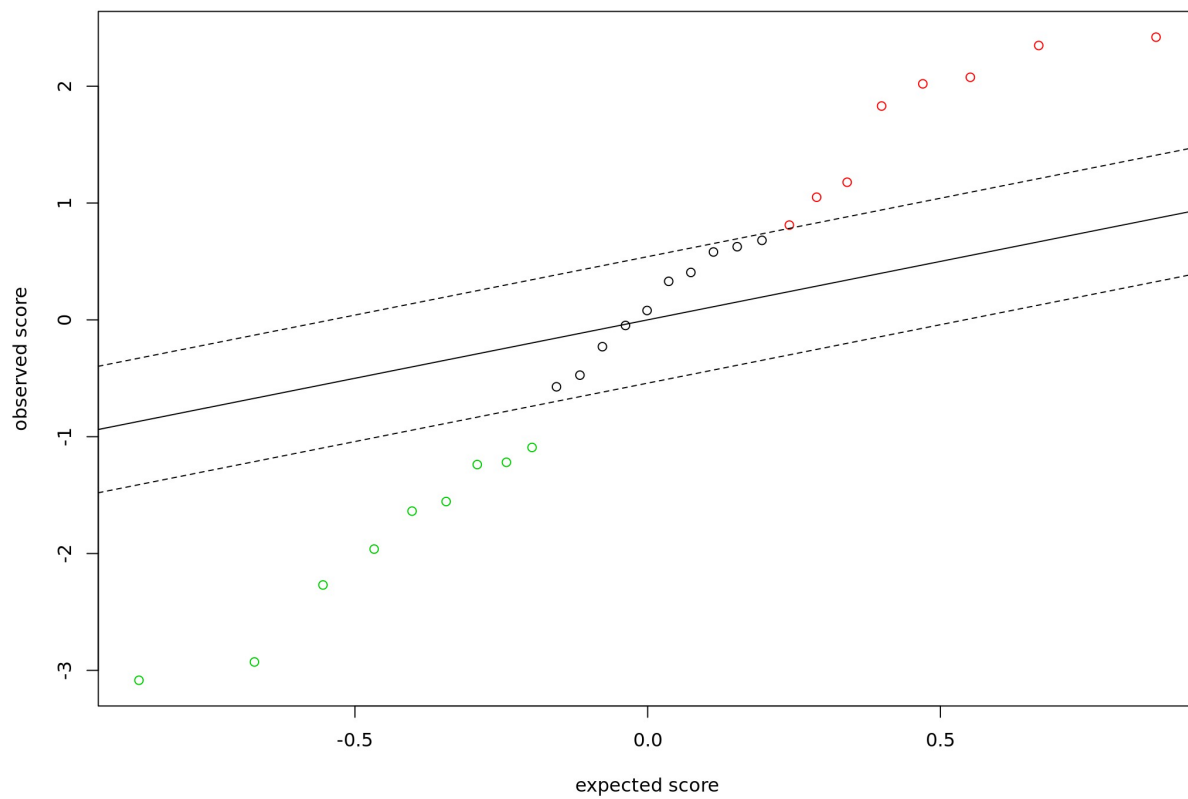

```
## NULL
## Call:
## SAM(x = t(pcbilDataTumorClusters[1:27]), y = subsetClasses, resp.type =
"Two class unpaired",
##     genenames = colnames(pcbilDataTumorClusters)[1:27], nperms = 1000,
##     testStatistic = "wilcoxon", regression.method = "ranks",
##     fdr.output = alpha)
##
## Genes up
##      Gene ID Gene Name Score(d) Numerator(r) Denominator(s+s0) Fold Chang
e
## [1,] ck17      3        2.42      1445        597.167        4.14
6
## [2,] ck7       2        2.349     1402.5        597.167        1.91
1
## [3,] muc1      8        2.076     1240        597.167        2.15
9
## [4,] muc5ac   10        2.02      1206.5        597.167        2.25
3
## [5,] ca125    16        1.83      1093        597.167        2.2
4
## [6,] ema      13        1.178     703.5        597.167        1.07
8
## [7,] vim       7        1.05      627        597.167        25.4
9
## [8,] muc6     11        0.811     484.5        597.167        1.58
4
##      q-value(%)
## [1,] 0
## [2,] 0
## [3,] 0
## [4,] 0
## [5,] 0
## [6,] 0
## [7,] 0
## [8,] 1.307
##
## Genes down
##      Gene ID Gene Name Score(d) Numerator(r) Denominator(s+s0)
## [1,] cdx2     20       -3.085    -1842        597.167
## [2,] ck20      6       -2.928    -1748.5      597.167
## [3,] muc2      9       -2.269    -1355        597.167
## [4,] mcea     14       -1.962    -1171.5      597.167
## [5,] cd56     26       -1.637    -977.5       597.167
## [6,] smad4    24       -1.555    -928.5       597.167
## [7,] ki67     23       -1.238    -739.5       597.167
## [8,] chra     25       -1.219    -728         597.167
## [9,] cd10     27       -1.092    -652         597.167
##      Fold Change q-value(%)
## [1,] 0.213      0
## [2,] 0.122      0
## [3,] 0.063      0
```

```
## [4,] 0.64      0
## [5,] 0.166     0
## [6,] 0.601     0
## [7,] 0.756     0
## [8,] 0.404     0
## [9,] 0.366     0
## [1] "class 1: extrahepatic pancreatobiliary | class 2: intestinal"
## perm= 1 ... 1000
##
## Computing delta table
## 1 ... 50
```

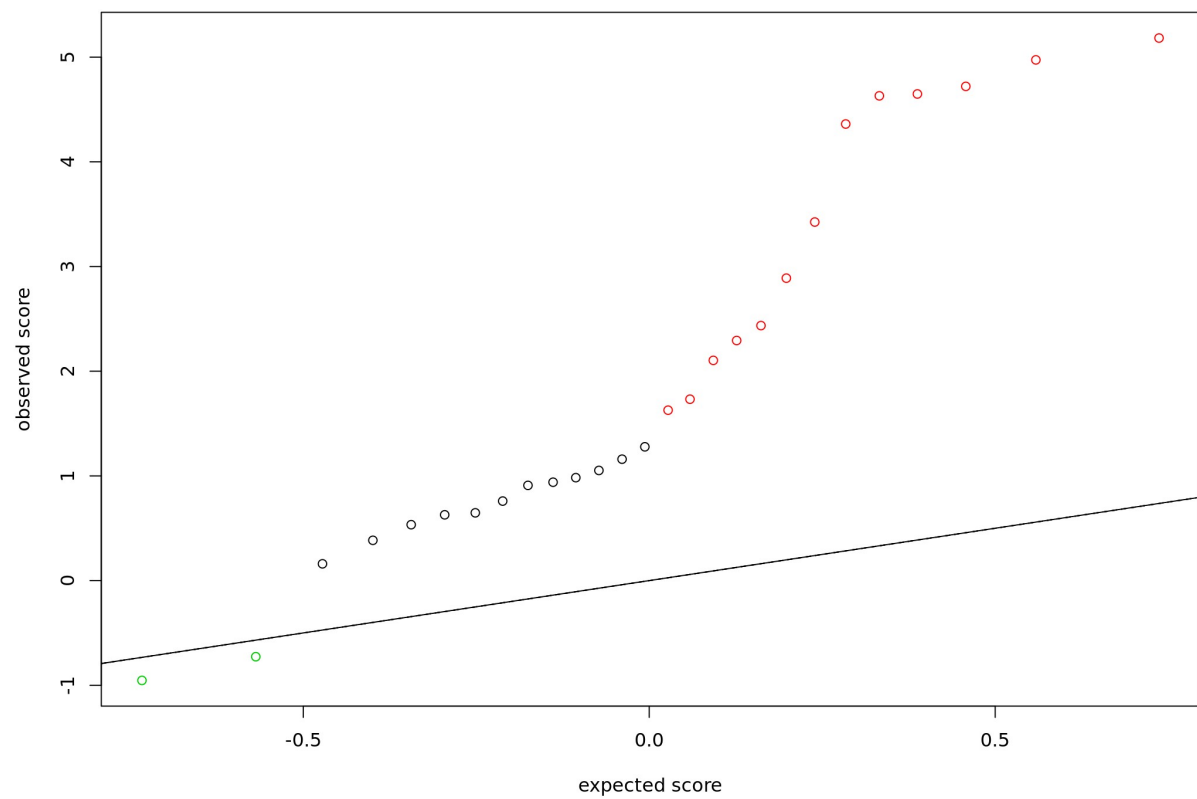

```
## NULL
## Call:
## SAM(x = t(pcbilDataTumorClusters[1:27]), y = subsetClasses, resp.type =
"Two class unpaired",
##     genenames = colnames(pcbilDataTumorClusters)[1:27], nperms = 1000,
##     testStatistic = "wilcoxon", regression.method = "ranks",
##     fdr.output = alpha)
##
## Genes up
##      Gene ID Gene Name Score(d) Numerator(r) Denominator(s+s0)
## [1,] ck19      5      5.182    2745.5      529.772
## [2,] berep4   12      4.974    2635      529.772
## [3,] ema      13      4.721    2501      529.772
## [4,] muc1      8      4.648    2462.5     529.772
## [5,] ck7       2      4.63     2453      529.772
## [6,] ca19.9   17      4.361    2310.5     529.772
## [7,] vim       7      3.425    1814.5     529.772
## [8,] smad4    24      2.889    1530.5     529.772
## [9,] wt1cyt   19      2.436    1290.5     529.772
## [10,] ki67    23      2.293    1215      529.772
## [11,] maspin  18      2.104    1114.5     529.772
## [12,] pcea    15      1.733     918      529.772
## [13,] mcea    14      1.628     862.5     529.772
##      Fold Change q-value(%)
## [1,] 15.205      0
## [2,] 67.847      0
## [3,] 6.452       0
## [4,] 11.608      0
## [5,] 11.34       0
## [6,] 80.313      0
## [7,] 10.168      0
## [8,] 1.17        0
## [9,] 15.439      0
## [10,] 1.454      0
## [11,] 6.881      0
## [12,] 1.501      0
## [13,] 8.178      0
##
## Genes down
##      Gene ID Gene Name Score(d) Numerator(r) Denominator(s+s0) Fold Chang
e
## [1,] ck20      6      -0.953    -505      529.772      0.47
6
## [2,] cd10     27      -0.727    -385      529.772      0.50
9
##      q-value(%)
## [1,] 0
## [2,] 0
## [1] "class 1: intrahepatic cholangiocarcinoma | class 2: hepatocellular c
arcinoma"
```

Differential expression analysis - extract markers that were consistently significant by all three tests (multtest, RankProd, and SAM)

```
cont <- 1
while(cont <= length(diffDiagn1)) {

  temp <- intersect(multtestResults[[cont]], rankProdResults[[cont]])
  final <- intersect(temp, samResults[[cont]])

  print(paste(diffDiagn1[cont], " vs ", diffDiagn2[cont], ":", sep=""))
  print(final)
  print("-----")
  print("")

  cont <- cont + 1
}
```

```
## [1] "extrahepatic pancreatobiliary vs intrahepatic cholangiocarcinoma:"
## [1] "maspin" "cal25" "mcea" "muc5ac" "ck17" "p53" "cdx2"
## [8] "cd56" "wt1cyt" "vim" "smad4"
## [1] "-----"
## [1] ""
## [1] "extrahepatic pancreatobiliary vs intestinal:"
## [1] "ck7" "muc1" "muc5ac" "ck17" "muc2" "ck20" "cdx2"
## [1] "-----"
## [1] ""
## [1] "intrahepatic cholangiocarcinoma vs hepatocellular carcinoma:"
## [1] "ck19" "bep4" "ck7" "muc1" "cal9.9" "vim" "pcea"
## [8] "maspin" "wt1cyt" "smad4" "ki67" "mcea"
## [1] "-----"
## [1] ""
```

– End of differential expression analysis –
