# Supplementary material
Source: publisher figshare collection journal article supplement (https://plos.figshare.com/articles/dataset/_/4221999)
Supplement: Supplementary file 1 [file 1 › S2 Table.PDF]

**Supplementary Table 2:** Relationship between the immunohistochemical tumor types and anatomically-based diagnoses (n = 409), according to the results of hierarchical cluster analysis.

| Immunohistochemical types                | Anatomical diagnoses         |                                            |                                 |                             |                                       |                                          |                                   |
|------------------------------------------|------------------------------|--------------------------------------------|---------------------------------|-----------------------------|---------------------------------------|------------------------------------------|-----------------------------------|
|                                          | Ampullary carcinoma (n = 24) | Ductal pancreatic adenocarcinoma (n = 139) | Distal bile duct cancer (n = 7) | Gallbladder cancer (n = 37) | Perihilar cholangiocarcinoma (n = 27) | Intrahepatic cholangiocarcinoma (n = 97) | Hepatocellular carcinoma (n = 78) |
| Extrahepatic pancreatobiliary (n = 199)  | 14                           | 116                                        | 5                               | 23                          | 14                                    | 27                                       | 0                                 |
| Intestinal (n = 24)                      | 7                            | 8                                          | 1                               | 4                           | 1                                     | 3                                        | 0                                 |
| Intrahepatic cholangiocarcinoma (n = 82) | 1                            | 9                                          | 1                               | 3                           | 9                                     | 56                                       | 3                                 |
| Hepatocellular carcinoma (n = 68)        | 0                            | 0                                          | 0                               | 1                           | 0                                     | 0                                        | 67                                |
| Unclassified (n = 36)                    | 2                            | 6                                          | 0                               | 6                           | 3                                     | 11                                       | 8                                 |
