# Supplementary material
Source: publisher figshare collection journal article supplement (https://plos.figshare.com/articles/dataset/_/4221999)
Supplement: Supplementary file 1 [file 1 › S3 File.PDF]

# Immunoprofiling of adenocarcinomas of the pancreatobiliary tree

## Survival analysis - resected patients

Generated on: 2016-08-07 19:47:49

Import required packages

```
# Build pre-requisites
# install.packages("survival")
# install.packages("AICcmodavg")
# install.packages("pastecs")
# install.packages("rms")
# install.packages("xtable")
```

```
library(survival)
```

```
## Loading required package: splines
```

```
library(AICcmodavg)
```

```
library(pastecs)
```

```
## Loading required package: boot
##
## Attaching package: 'boot'
##
## The following object is masked from 'package:survival':
##
##      aml
```

```
library(rms)
```

```
## Loading required package: Hmisc
## Loading required package: grid
## Loading required package: lattice
##
## Attaching package: 'lattice'
##
## The following object is masked from 'package:boot':
##
##     melanoma
##
## Loading required package: Formula
## Loading required package: ggplot2
##
## Attaching package: 'Hmisc'
##
## The following objects are masked from 'package:base':
##
##     format.pval, round.POSIXt, trunc.POSIXt, units
##
## Loading required package: SparseM
##
## Attaching package: 'SparseM'
##
## The following object is masked from 'package:base':
##
##     backsolve
##
## Attaching package: 'rms'
##
## The following object is masked from 'package:pastecs':
##
##     specs
```

```
library(xtable)
```

```
##
## Attaching package: 'xtable'
##
## The following objects are masked from 'package:Hmisc':
##
##     label, label<-
```

Configure file names

```
#myWorkDir <- "~/Workspace/research/pcbil/"
myWorkDirectory <- "/home/guest/pcbil/"

survDataFileName <- paste(myWorkDirectory, "data_analysis/tidy_datasets/pcbil_survival.csv", sep="")
```

## Import all survival data

```
completeSurvData <- read.csv(file = survDataFileName, na.strings = "")

completeSurvData$date_birth <- as.Date(completeSurvData$date_birth)
completeSurvData$date_pad <- as.Date(completeSurvData$date_pad)
completeSurvData$date_death <- as.Date(completeSurvData$date_death)

# Remove unclassified from immunohistochemical clusters, as they are not a real cluster
# and hepatocellular carcinoma, as it was only the control group for the clustering
table(completeSurvData$cluster, useNA = "always")
```

```
##
##      extrahepatic pancreatobiliary      hepatocellular carcinoma
##                               172                               58
##              intestinal intrahepatic cholangiocarcinoma
##                               21                               74
##              unclassified
##                               31                               0
```

```
completeSurvData[ completeSurvData$cluster == "unclassified" , c("cluster")] <- NA
completeSurvData$cluster <- droplevels(completeSurvData$cluster)
table(completeSurvData$cluster, useNA = "always")
```

```
##
##      extrahepatic pancreatobiliary      hepatocellular carcinoma
##                               172                               58
##              intestinal intrahepatic cholangiocarcinoma
##                               21                               74
##              <NA>
##                               31
```

```
# Relevel clusters
completeSurvData$cluster = factor(completeSurvData$cluster, levels(completeSurvData$cluster)[c(1,3,4,2)])

# Relevel clinical diagnoses
completeSurvData$clin_diag = factor(completeSurvData$clin_diag, levels(completeSurvData$clin_diag)[c(3, 1, 2, 4, 7, 6, 5)])

# Relevel so the largest group (pT3) is baseline category for cox and hr estimates
table(completeSurvData$p_t)
```

```
##
##  1  2  3  4 is
## 10 35 41 12  1
```

```
completeSurvData$p_t <- relevel(completeSurvData$p_t, "3")
completeSurvData <- subset(completeSurvData, clin_diag != "Hepatocellular carcinoma")

# Integrity check
str(completeSurvData)
```

```
## 'data.frame':    289 obs. of  14 variables:
## $ pad           : Factor w/ 356 levels "Ampulla Ac|124",...: 1 2 3 4 5 6 7 8 9 10 ...
## $ date_birth    : Date, format: "1936-03-05" "1917-05-27" ...
## $ gender        : Factor w/ 2 levels "f","m": 2 1 1 2 2 1 2 2 1 2 ...
## $ date_pad      : Date, format: "2005-04-26" "2005-09-20" ...
## $ type_probe    : Factor w/ 2 levels "b","r": 2 1 1 2 1 2 1 2 2 2 ...
## $ p_t           : Factor w/ 5 levels "3","1","2","4",...: 1 NA NA 3 NA 2 NA 1 1 2 ...
## $ p_n           : Factor w/ 4 levels "0","1","2","x": 2 NA NA 1 NA 1 NA 2 1 1 ...
## $ date_death    : Date, format: "2007-04-13" "2006-05-28" ...
## $ age_pad       : num  830 1060 956 893 929 ...
## $ age_pad_years : num  69.1 88.3 79.7 74.4 77.5 ...
## $ surv_time     : num  23.59 8.26 10.23 3.87 0.16 ...
## $ death_observed: int   1 1 1 1 1 1 1 0 1 1 ...
## $ clin_diag     : Factor w/ 7 levels "Ductal pancreatic adenocarcinoma",...: 2 2 2 2 2 2 2 2 2 2 ...
## $ cluster       : Factor w/ 4 levels "extrahepatic pancreatobiliary",...: 1 1 1 1 2 2 1 2 NA 1 ...
```

```
table(is.na(completeSurvData$type_probe))
```

```
##  
## FALSE  
## 289
```

```
# Survival summary, whole series  
dim(completeSurvData)
```

```
## [1] 289 14
```

```
summary(completeSurvData$surv_time)
```

```
##      Min. 1st Qu.  Median    Mean 3rd Qu.    Max.  
##      0.03   2.86   8.03   18.14   20.96   143.40
```

```
round(stat.desc(completeSurvData$surv_time, basic = FALSE, norm = TRUE), di  
gits=3)
```

```
##      median      mean    SE.mean CI.mean.0.95      var  
##      8.030    18.144    1.480     2.912    632.765  
##      std.dev   coef.var   skewness   skew.2SE   kurtosis  
##      25.155     1.386     2.346     8.183     5.838  
##      kurt.2SE  normtest.W  normtest.p  
##      10.216     0.687     0.000
```

```
# Obtain resection data set AND filter out early postoperative death (2 mont  
hs)  
resCompleteSurvData <- subset(completeSurvData, (type_probe == "r" & surv_ti  
me > 2))  
resCompleteSurvData$cluster <- droplevels(resCompleteSurvData$cluster)  
resCompleteSurvData$clin_diag <- droplevels(resCompleteSurvData$clin_diag)
```

Function to generate a table report of cox analysis; based on R code: `getAnywhere  
(summary.coxph)`

```

getCoxTable <- function(cox, rows) {

  # Prepare the columns
  beta <- coef(cox)
  HR <- exp(beta)
  se    <- sqrt(diag(cox$var))
  p     <- 1 - pchisq((beta/se)^2, 1)

  conf.int = 0.95
  z <- qnorm((1 + conf.int)/2, 0, 1)
  LCI <- exp(beta - z * se)
  UCI <- exp(beta + z * se)

  # Bind columns together, and select desired rows
  res <- cbind(HR, LCI, UCI, p)
  res <- res[rows,]

  return(res)
}

```

## Type of probe

```

# Biopsy vs resection
bx_resPcbilSurvFit <- npsurv(formula = Surv(surv_time, death_observed) ~ type_probe, data = completeSurvData)
print(bx_resPcbilSurvFit, print.rmean = TRUE)

```

```

## Call: npsurv(formula = Surv(surv_time, death_observed) ~ type_probe,
##      data = completeSurvData)
##
##              records n.max n.start events *rmean *se(rmean) median 0.95LC
L
## type_probe=b      199   199      199   194   9.76      1.17   6.19   4.9
6
## type_probe=r       90    90       90    67  46.53      4.57  30.73  21.6
6
##              0.95UCL
## type_probe=b        6.9
## type_probe=r       36.7
##      * restricted mean with upper limit = 114

```

```

survplot(bx_resPcbilSurvFit, conf = c("none","bands","bars")[1], xlim = c
(0, 150), main = "KM - Biopsy vs resection", xlab = "Time (months)", ylab =
"Survival", time.inc = 10, n.risk = TRUE, y.n.risk = -0.3, cex.n.risk =
0.6) # Add to shor 6-yrs, xlim = c(0, 72) # Remove CI c("none","bands","bar
s")[1]

```

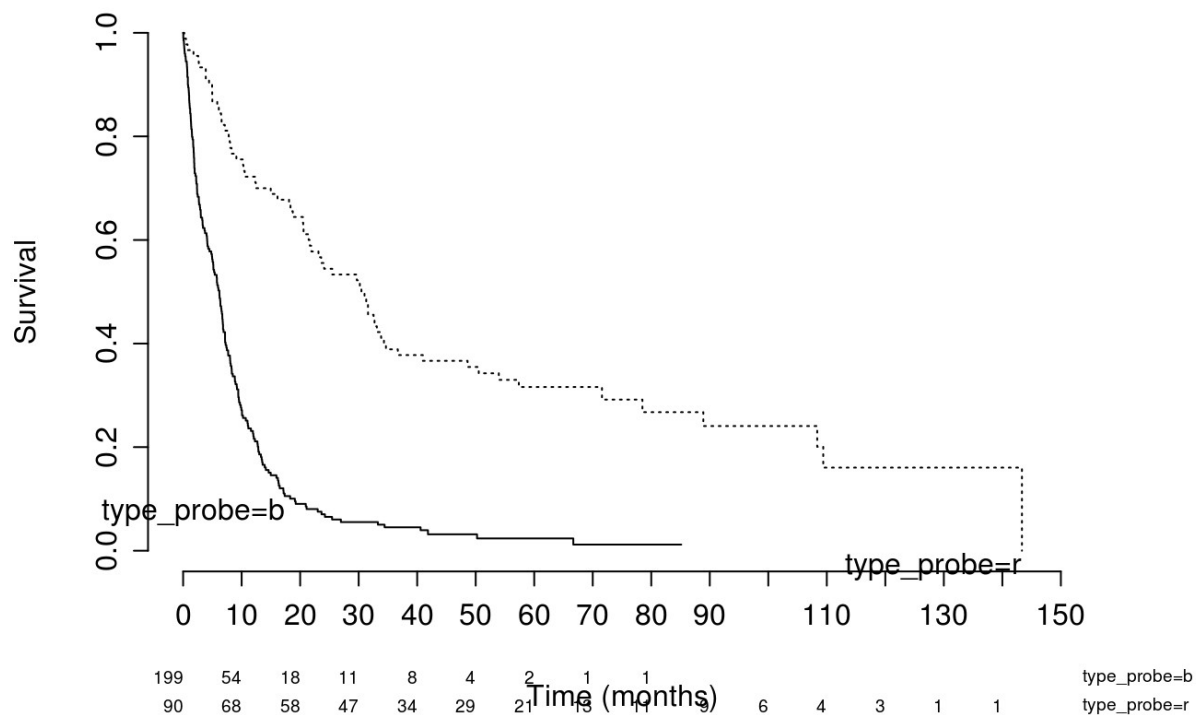

```
# Univariate: Cox proportional hazards regression model.
summary(coxph(Surv(surv_time, death_observed) ~ type_probe, data = completeS
urvData))
```

```
## Call:
## coxph(formula = Surv(surv_time, death_observed) ~ type_probe,
##       data = completeSurvData)
##
## n= 289, number of events= 261
##
##               coef exp(coef) se(coef)      z Pr(>|z|)
## type_prober -1.3720   0.2536   0.1551 -8.844  <2e-16 ***
## ---
## Signif. codes:  0 '***' 0.001 '**' 0.01 '*' 0.05 '.' 0.1 ' ' 1
##
##               exp(coef) exp(-coef) lower .95 upper .95
## type_prober    0.2536      3.943    0.1871    0.3437
##
## Concordance= 0.638 (se = 0.017 )
## Rsquare= 0.271 (max possible= 1 )
## Likelihood ratio test= 91.25 on 1 df,  p=0
## Wald test               = 78.22 on 1 df,  p=0
## Score (logrank) test = 86.73 on 1 df,  p=0
```

# Age

```
# Missing data check
table(is.na(resCompleteSurvData$age_pad_years))
```

```
##
## FALSE
##      86
```

```
# descriptives age surgery
summary(resCompleteSurvData$age_pad_years)
```

```
##      Min. 1st Qu.  Median    Mean 3rd Qu.    Max.
##      32.16   59.29   65.68   64.75   72.08   82.74
```

```
# Age categories
resCompleteSurvData$age_pad_years_cat <- cut(resCompleteSurvData$age_pad_years, breaks=c(0, 66, 83))
head(resCompleteSurvData[, c("age_pad_years", "age_pad_years_cat")])
```

```
##      age_pad_years age_pad_years_cat
## 1             69.14             (66,83]
## 4             74.40             (66,83]
## 6             52.86             (0,66]
## 8             36.82             (0,66]
## 9             78.86             (66,83]
## 10            70.20             (66,83]
```

```
# Relevel age cats
resCompleteSurvData$age_pad_years_cat = factor(resCompleteSurvData$age_pad_years_cat, levels(resCompleteSurvData$age_pad_years_cat)[c(2,1)])
```

```
# KM
age_pad_years_cat_resPcbilSurvFit <- npsurv(formula = Surv(surv_time, death_observed) ~ age_pad_years_cat, data = resCompleteSurvData)
print(age_pad_years_cat_resPcbilSurvFit, print.rmean = TRUE)
```

```
## Call: npsurv(formula = Surv(surv_time, death_observed) ~ age_pad_years_cat,
##           data = resCompleteSurvData)
##
##               records n.max n.start events *rmean *se(rmean)
## age_pad_years_cat=(66,83]      42      42      42      31   54.7      7.87
## age_pad_years_cat=(0,66]       44      44      44      32   49.4      7.53
##               median 0.95LCL 0.95UCL
## age_pad_years_cat=(66,83]    32.1    24.1    78.5
## age_pad_years_cat=(0,66]     30.3    18.7    57.4
##           * restricted mean with upper limit = 136
```

```
survplot(age_pad_years_cat_resPcbilSurvFit, conf = c("none", "bands", "bars")
[1], xlim = c(0, 150), main = "KM - By age", xlab = "Time (months)", ylab =
"Survival", time.inc = 10, n.risk = TRUE, y.n.risk = -0.3, cex.n.risk =
0.6) # Add to show 6-yrs, xlim = c(0, 72) # Remove CI c("none", "bands", "bars")
[1]
```

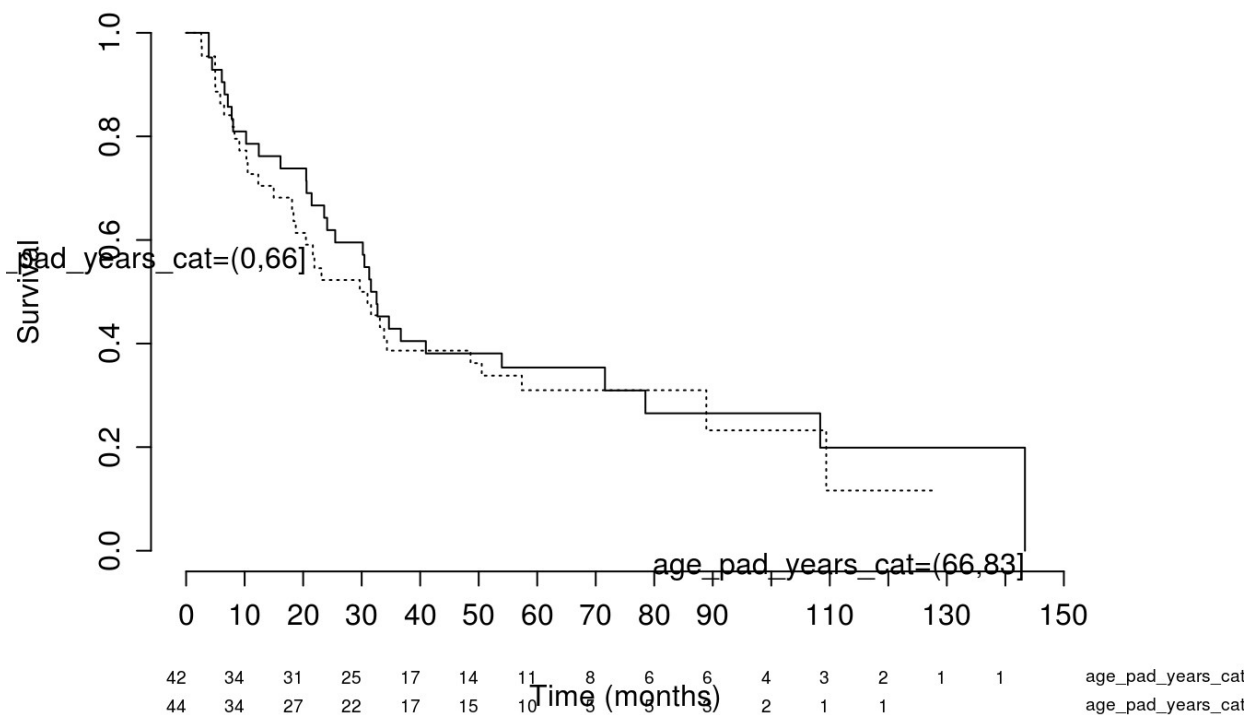

```
# Univariate: Cox proportional hazards regression model.
summary(coxph(Surv(surv_time, death_observed) ~ age_pad_years_cat, data = resCompleteSurvData))
```

```
## Call:
## coxph(formula = Surv(surv_time, death_observed) ~ age_pad_years_cat,
##       data = resCompleteSurvData)
##
##      n= 86, number of events= 63
##
##               coef exp(coef) se(coef)      z Pr(>|z|)
## age_pad_years_cat(0,66] 0.1331    1.1424   0.2547 0.522    0.601
##
##               exp(coef) exp(-coef) lower .95 upper .95
## age_pad_years_cat(0,66]    1.142    0.8754   0.6934    1.882
##
## Concordance= 0.522  (se = 0.035 )
## Rsquare= 0.003    (max possible= 0.996 )
## Likelihood ratio test= 0.27  on 1 df,   p=0.6012
## Wald test               = 0.27  on 1 df,   p=0.6013
## Score (logrank) test = 0.27  on 1 df,   p=0.6011
```

## Gender

```
# Missing data check
table(is.na(resCompleteSurvData$gender))
```

```
##
## FALSE
##      86
```

```
# descriptives gender
summary(resCompleteSurvData$gender)
```

```
##   f   m
## 47 39
```

```
# KM
gender_resPcbilSurvFit <- npsurv(formula = Surv(surv_time, death_observed)
~ gender, data = resCompleteSurvData)
print(gender_resPcbilSurvFit, print.rmean = TRUE)
```

```
## Call: npsurv(formula = Surv(surv_time, death_observed) ~ gender, data = resCompleteSurvData)
##
##           records n.max n.start events *rmean *se(rmean) median 0.95LCL
## gender=f         47    47     47    37   47.2      6.87   29.7   18.1
## gender=m         39    39     39    26   54.4      7.77   33.1   24.1
##           0.95UCL
## gender=f         41
## gender=m         NA
##           * restricted mean with upper limit = 128
```

```
survplot(gender_resPcbilSurvFit, conf = c("none","bands","bars")[1], xlim =
c(0, 150), main = "KM - By gender", xlab = "Time (months)", ylab = "Survival",
time.inc = 10, n.risk = TRUE, y.n.risk = -0.3, cex.n.risk = 0.6) # Add to shor 6-yrs, xlim = c(0, 72) # Remove CI c("none","bands","bars")[1]
```

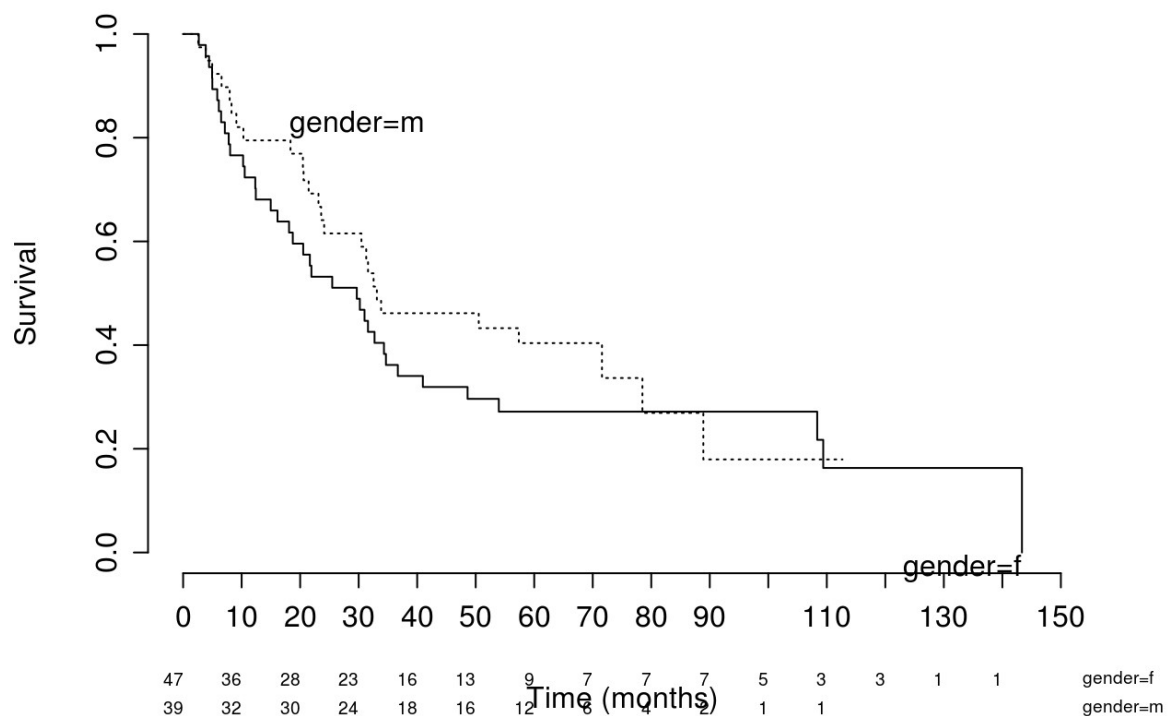

```
# Univariate:
coxGender <- coxph(Surv(surv_time, death_observed) ~ gender, data = resCompleteSurvData)
summary(coxGender)
```

```
## Call:
## coxph(formula = Surv(surv_time, death_observed) ~ gender, data = resCompleteSurvData)
##
##      n= 86, number of events= 63
##
##              coef exp(coef) se(coef)      z Pr(>|z|)
## genderm -0.2565    0.7738   0.2595 -0.988   0.323
##
##              exp(coef) exp(-coef) lower .95 upper .95
## genderm    0.7738        1.292    0.4653    1.287
##
## Concordance= 0.546 (se = 0.035 )
## Rsquare= 0.011 (max possible= 0.996 )
## Likelihood ratio test= 0.99 on 1 df,  p=0.3204
## Wald test = 0.98 on 1 df,  p=0.3229
## Score (logrank) test = 0.98 on 1 df,  p=0.3216
```

## pT

```
# Missing data check
table(is.na(resCompleteSurvData$p_t))
```

```
##
## FALSE
##      86
```

```
# descriptives p_t
summary(resCompleteSurvData$p_t)
```

```
##  3  1  2  4 is
## 39 10 27  9  1
```

```
# KM
p_t_resPcbilSurvFit <- npsurv(formula = Surv(surv_time, death_observed) ~ p_t, data = resCompleteSurvData)
print(p_t_resPcbilSurvFit, print.rmean = TRUE)
```

```
## Call: npsurv(formula = Surv(surv_time, death_observed) ~ p_t, data = resC
ompleteSurvData)
##
##           records n.max n.start events *rmean *se(rmean) median 0.95LCL
## p_t=3           39    39     39     31  42.6      6.30  25.48  21.45
## p_t=1           10    10     10      6  75.3     11.62  78.49  32.55
## p_t=2           27    27     27     18  55.5      8.38  34.32  29.68
## p_t=4            9      9      9      8  18.4     11.14   7.13   5.83
## p_t=is            1      1      1      0 112.7      0.00    NA    NA
##           0.95UCL
## p_t=3           36.7
## p_t=1            NA
## p_t=2            NA
## p_t=4            NA
## p_t=is            NA
##           * restricted mean with upper limit = 113
```

```
survplot(p_t_resPcbilSurvFit, conf = c("none", "bands", "bars")[1], xlim = c
(0, 150), main = "KM - By pT", xlab = "Time (months)", ylab = "Survival", ti
me.inc = 10, n.risk = TRUE, y.n.risk = -0.3, cex.n.risk = 0.6) # Add to s
hor 6-yrs, xlim = c(0, 72) # Remove CI c("none", "bands", "bars")[1]
```

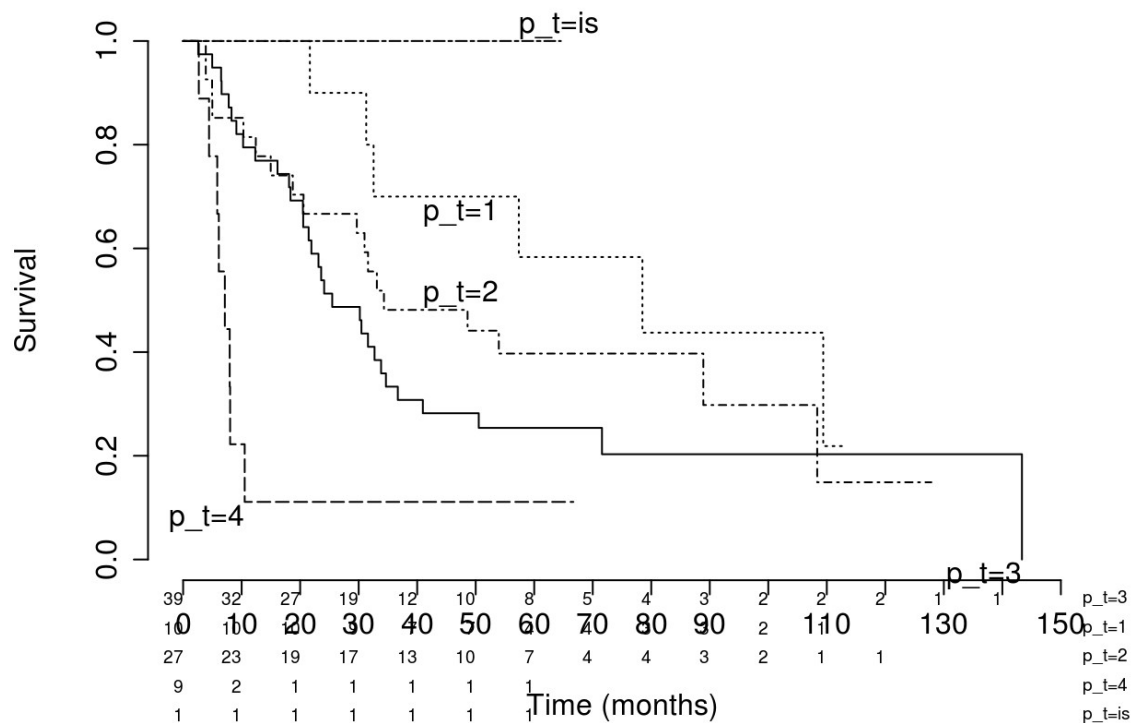

```
# Univariate
coxpT <- coxph(Surv(surv_time, death_observed) ~ p_t, data = resCompleteSurv
Data)
```

```
## Warning in fitter(X, Y, strats, offset, init, control, weights = weights,
:
## Loglik converged before variable 4 ; beta may be infinite.
```

```
summary(coxpT)
```

```
## Call:
## coxph(formula = Surv(surv_time, death_observed) ~ p_t, data = resComplete
SurvData)
##
##      n= 86, number of events= 63
##
##              coef  exp(coef)    se(coef)      z  Pr(>|z|)
## p_t1 -7.858e-01  4.558e-01  4.507e-01 -1.743  0.08129 .
## p_t2 -2.917e-01  7.470e-01  2.992e-01 -0.975  0.32956
## p_t4  1.215e+00  3.369e+00  4.095e-01  2.966  0.00302 **
## p_tis -1.653e+01  6.633e-08  3.463e+03 -0.005  0.99619
## ---
## Signif. codes:  0 '***' 0.001 '**' 0.01 '*' 0.05 '.' 0.1 ' ' 1
##
##              exp(coef) exp(-coef) lower .95 upper .95
## p_t1  4.558e-01  2.194e+00    0.1884    1.103
## p_t2  7.470e-01  1.339e+00    0.4155    1.343
## p_t4  3.369e+00  2.968e-01    1.5097    7.517
## p_tis 6.633e-08  1.508e+07    0.0000    Inf
##
## Concordance= 0.644  (se = 0.037 )
## Rsquare= 0.165  (max possible= 0.996 )
## Likelihood ratio test= 15.47  on 4 df,  p=0.003816
## Wald test              = 15.81  on 4 df,  p=0.003287
## Score (logrank) test = 19.81  on 4 df,  p=0.0005448
```

```
# Test the Proportional Hazards Assumption of a Cox Regression
# when the test is non-significant, indicates an absence of evidence to cont
radict the proportionality assumption
cox_pha <- cox.zph(coxpT)
print(cox_pha)
```

```
##              rho    chisq      p
## p_t1    0.1986 2.29e+00 0.1303
## p_t2   -0.0172 1.80e-02 0.8932
## p_t4   -0.2203 2.75e+00 0.0971
## p_tis  -0.1545 3.07e-09 1.0000
## GLOBAL      NA 6.05e+00 0.1955
```

```
plot(cox_pha)
```

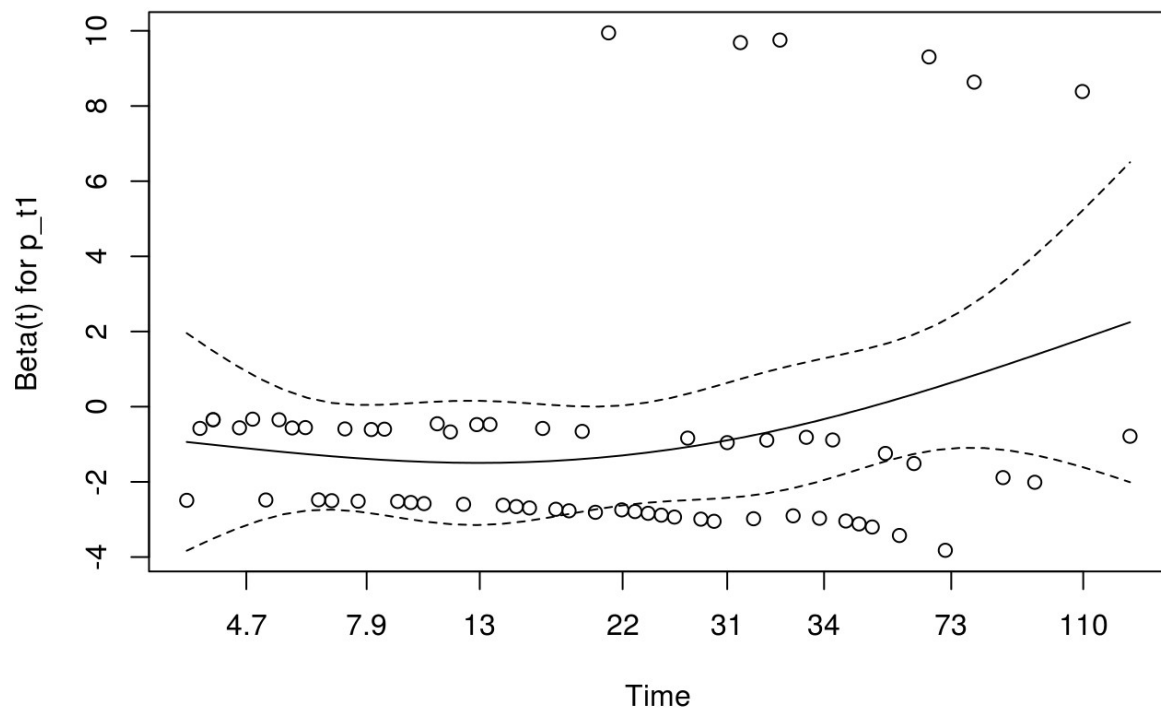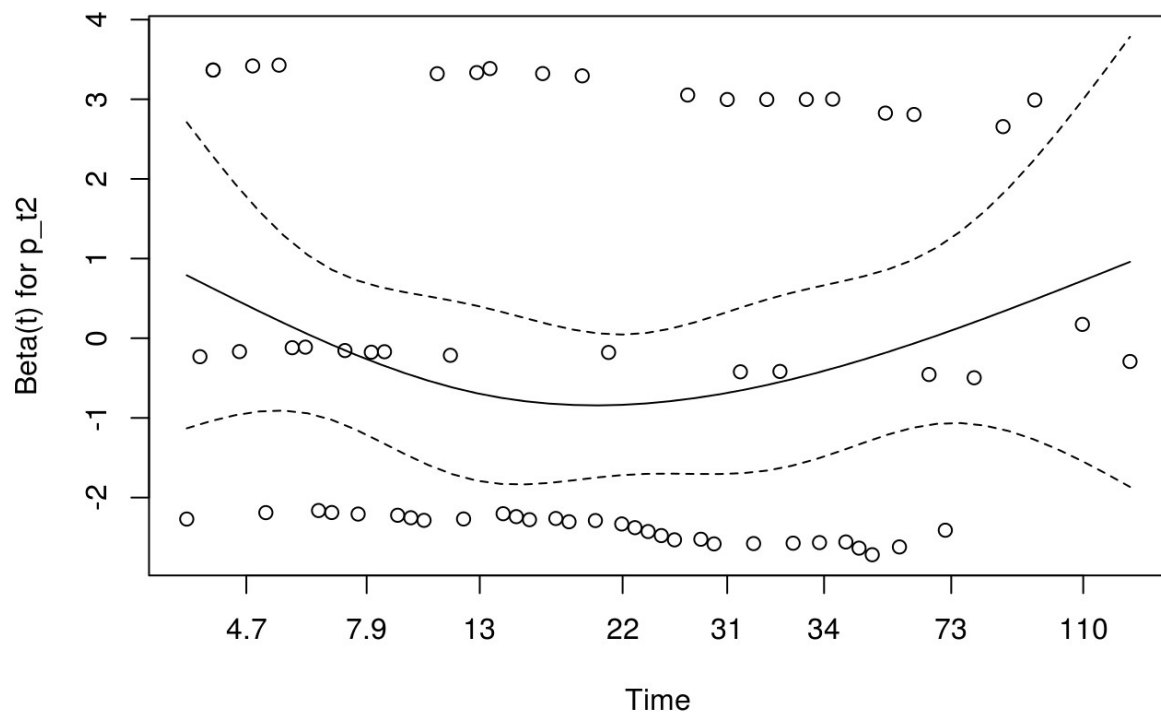

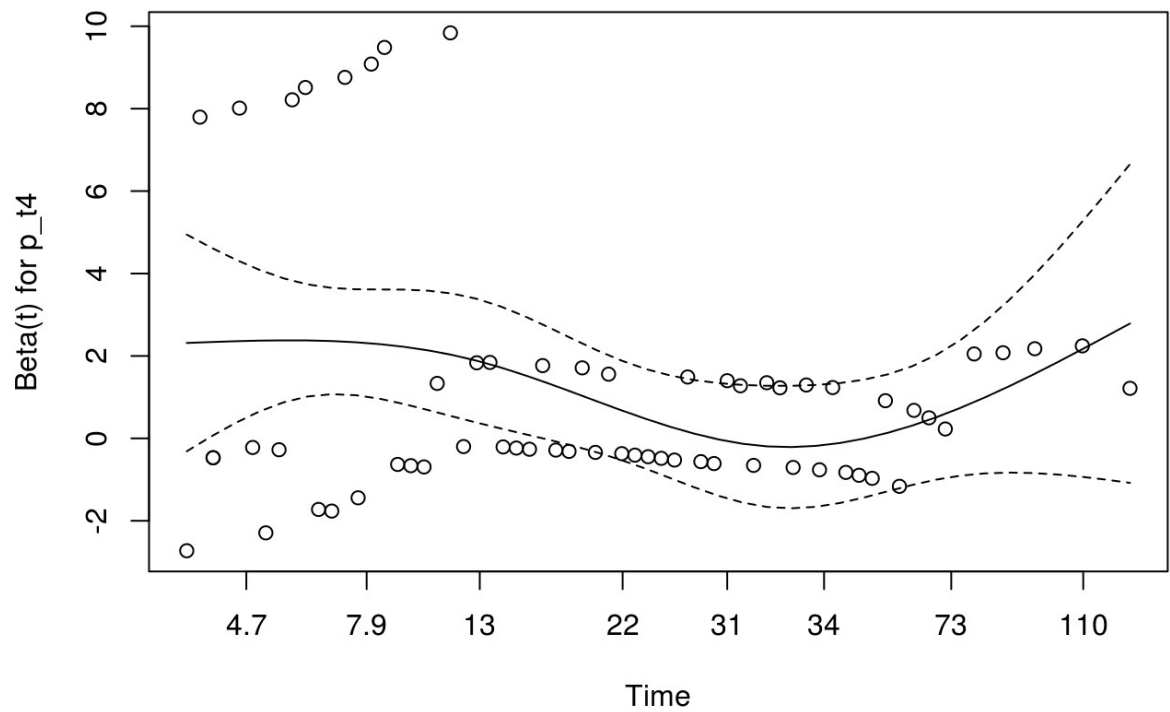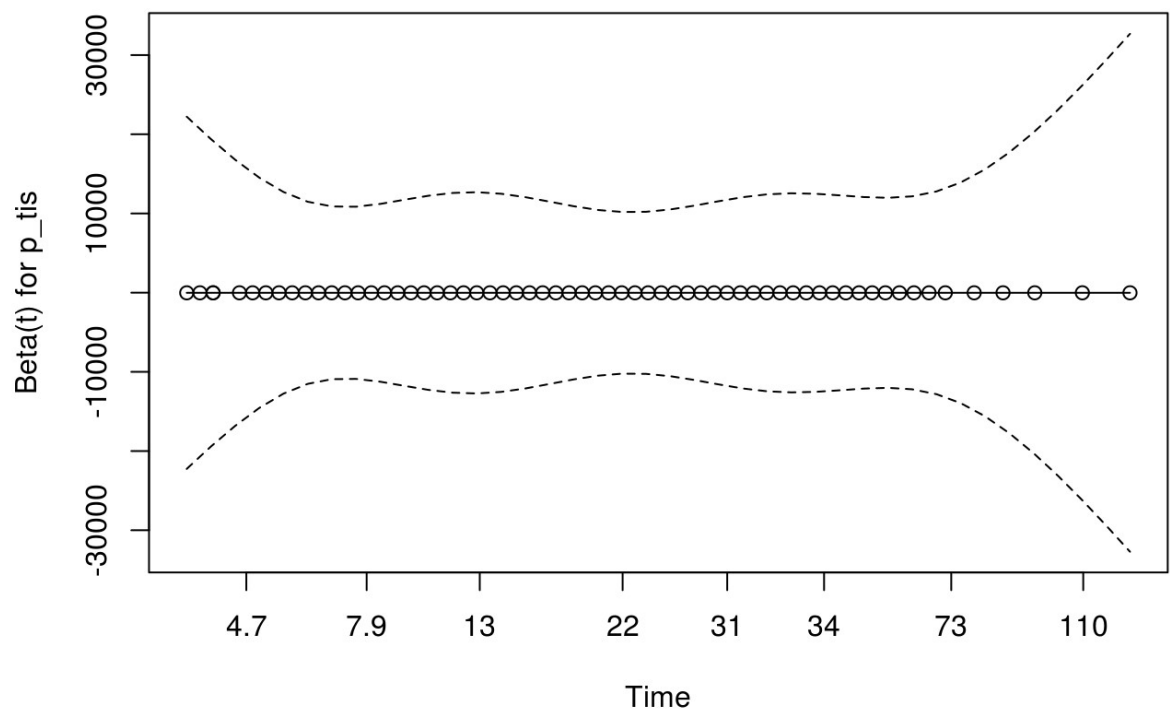

Survival table data: p<sub>t</sub>

```

rowsOfInterest <- c( paste("p_t", levels(resCompleteSurvData$p_t)[2 : length
(levels(resCompleteSurvData$p_t))], sep=""))
myXtable <- xtable(getCoxTable(coxpt, rowsOfInterest), caption = 'Survival t
able data: p_t')
digits(myXtable) <- c(0,2,2,2,3)
print(myXtable, type = "html", caption.placement = 'top')

```

Survival table data: p\_t

|       | HR   | LCI  | UCI  | p     |
|-------|------|------|------|-------|
| p_t1  | 0.46 | 0.19 | 1.10 | 0.081 |
| p_t2  | 0.75 | 0.42 | 1.34 | 0.330 |
| p_t4  | 3.37 | 1.51 | 7.52 | 0.003 |
| p_tis | 0.00 | 0.00 | Inf  | 0.996 |

## pN

```

# Missing data check
table(is.na(resCompleteSurvData$p_n))

```

```

##
## FALSE
##      86

```

```

# descriptives p_t
summary(resCompleteSurvData$p_n)

```

```

##    0    1    2    x
## 28 46    2 10

```

```

# Filter out pNX, as we don't know pN-status and group pN1/2
resCompleteSurvData[ resCompleteSurvData$p_n == "2", ]$p_n <- "1"
resCompleteSurvData[ resCompleteSurvData$p_n == "x", ]$p_n <- NA
resCompleteSurvData$p_n <- droplevels(resCompleteSurvData$p_n)

resCompleteSurvData$p_n <- relevel(resCompleteSurvData$p_n, "1")
summary(resCompleteSurvData$p_n)

```

```

##      1      0 NA's
##   48   28   10

```

```

# KM
p_n_resPcbilSurvFit <- npsurv(formula = Surv(surv_time, death_observed) ~ p_
n, data = resCompleteSurvData)
print(p_n_resPcbilSurvFit, print.rmean = TRUE)

```

```
## Call: npsurv(formula = Surv(surv_time, death_observed) ~ p_n, data = resCompleteSurvData)
##
##      10 observations deleted due to missingness
##           records n.max n.start events *rmean *se(rmean) median 0.95LCL
## p_n=1         48    48    48    41   31.9      5.18   19.4   10.3
## p_n=0         28    28    28    17   66.2      9.73   48.6   32.5
##           0.95UCL
## p_n=1         25.5
## p_n=0          NA
##           * restricted mean with upper limit = 126
```

```
survplot(p_n_resPcbilSurvFit, conf = c("none", "bands", "bars")[1], xlim = c(
  0, 150), main = "KM - By pN", xlab = "Time (months)", ylab = "Survival", ti
me.inc = 10, n.risk = TRUE, y.n.risk = -0.3, cex.n.risk = 0.6) # Add to s
hor 6-yrs, xlim = c(0, 72) # Remove CI c("none", "bands", "bars")[1]
```

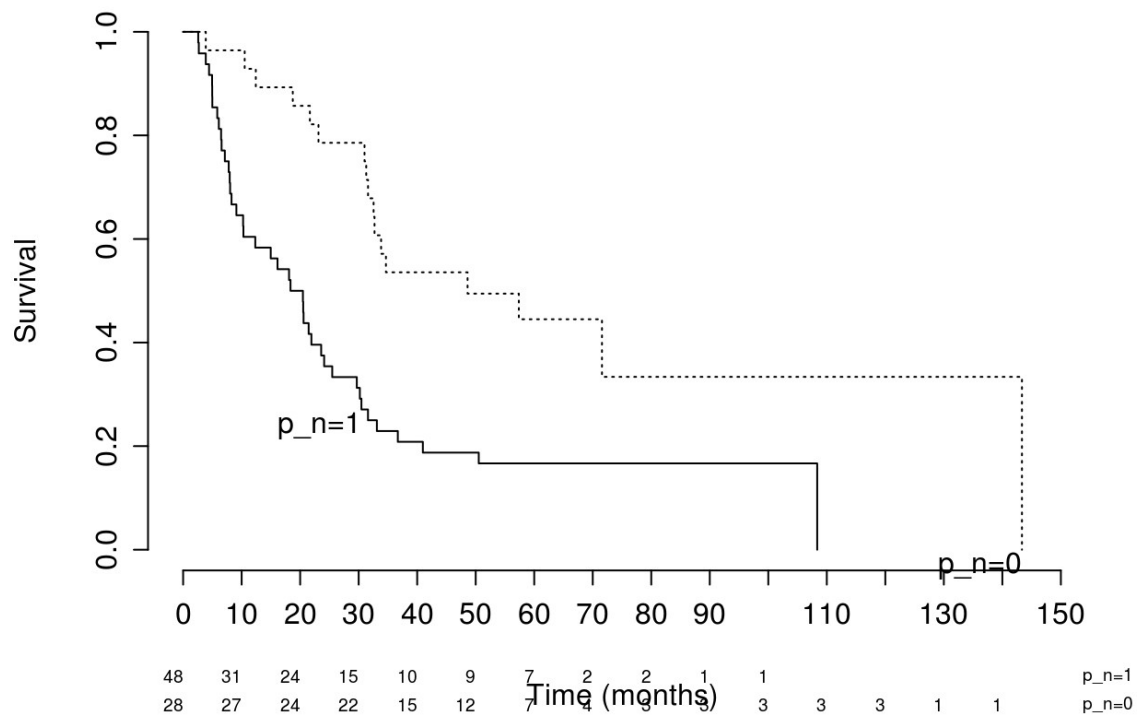

```
# Univariate
coxpt <- coxph(Surv(surv_time, death_observed) ~ p_n, data = resCompleteSurv
Data)
summary(coxpt)
```

```
## Call:
## coxph(formula = Surv(surv_time, death_observed) ~ p_n, data = resComplete
SurvData)
##
##      n= 76, number of events= 58
##      (10 observations deleted due to missingness)
##
##              coef exp(coef) se(coef)      z Pr(>|z|)
## p_n0 -1.0115      0.3637   0.2988 -3.385 0.000712 ***
## ---
## Signif. codes:  0 '***' 0.001 '**' 0.01 '*' 0.05 '.' 0.1 ' ' 1
##
##      exp(coef) exp(-coef) lower .95 upper .95
## p_n0      0.3637      2.75   0.2025   0.6532
##
## Concordance= 0.634 (se = 0.036 )
## Rsquare= 0.155 (max possible= 0.996 )
## Likelihood ratio test= 12.76 on 1 df,  p=0.0003535
## Wald test              = 11.46 on 1 df,  p=0.0007117
## Score (logrank) test = 12.38 on 1 df,  p=0.0004335
```

```
# Test the Proportional Hazards Assumption of a Cox Regression
# when the test is non-significant, indicates an absence of evidence to cont
radict the proportionality assumption
cox_pha <- cox.zph(coxpT)
print(cox_pha)
```

```
##              rho chisq      p
## p_n0 0.237      3 0.0834
```

```
plot(cox_pha)
```

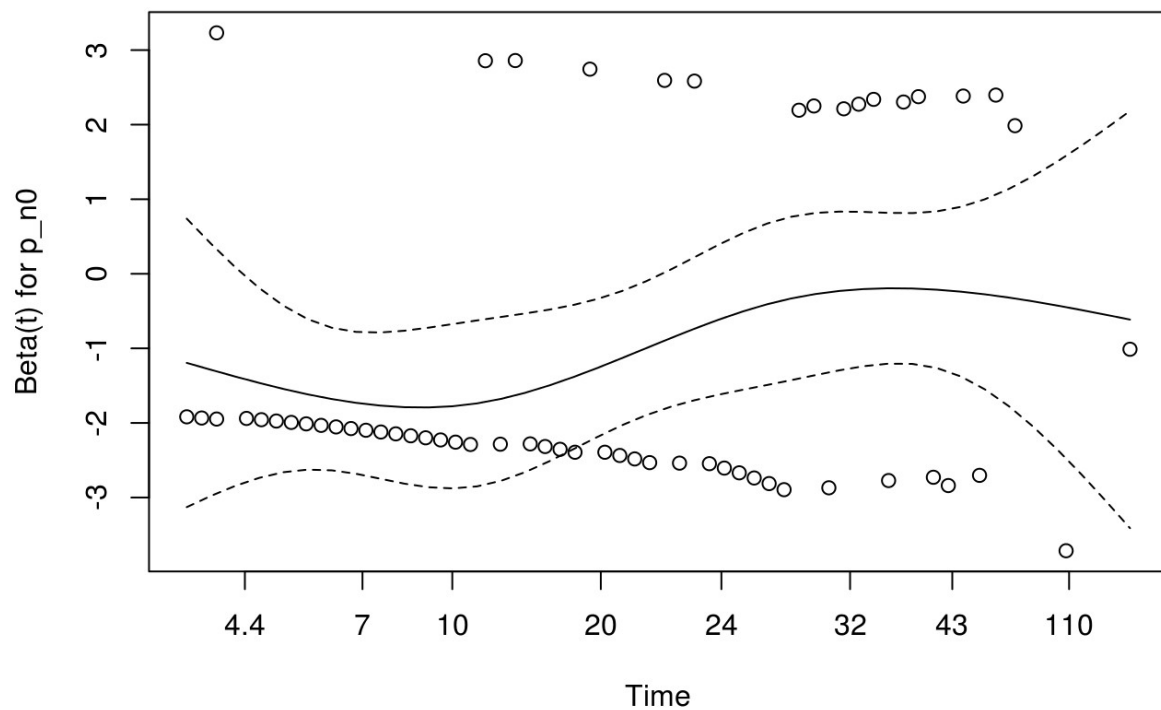

## Immunohistochemical type

```
# Missing data check
table(is.na(resCompleteSurvData$cluster))
```

```
##
## FALSE  TRUE
##      79     7
```

```
# -Resected patients, by cluster
cluster_res_PcbilSurvFit <- npsurv(formula = Surv(surv_time, death_observed) ~ cluster, data = resCompleteSurvData)
print(cluster_res_PcbilSurvFit, print.rmean = TRUE)
```

```
## Call: npsurv(formula = Surv(surv_time, death_observed) ~ cluster, data =
resCompleteSurvData)
##
##      7 observations deleted due to missingness
##
##                                records n.max n.start events
## cluster=extrahepatic pancreatobiliary      57      57      57      49
## cluster=intestinal                        8       8       8       4
## cluster=intrahepatic cholangiocarcinoma     14      14      14       7
##
##                                *rmean *se(rmean) median 0.95LCL
## cluster=extrahepatic pancreatobiliary     33.2       4.24    23.6    18.4
## cluster=intestinal                       71.9      14.82    54.0    31.0
## cluster=intrahepatic cholangiocarcinoma    76.0      11.54   109.4    32.5
##
##                                0.95UCL
## cluster=extrahepatic pancreatobiliary     32.7
## cluster=intestinal                       NA
## cluster=intrahepatic cholangiocarcinoma    NA
##      * restricted mean with upper limit = 113
```

```
# KM
sampleSize <- sum(!is.na(resCompleteSurvData$cluster))
survplot(cluster_res_PcbilSurvFit, conf = "none", label.curves = FALSE, tim
e.inc = 10, n.risk = TRUE,
         col = c("red", "blueviolet", "blue", "green"), lty = 1, lwd = 3, ce
x.n.risk = 0.8,
         xlab="", ylab = "Survival probability", y.n.risk = -0.4, adj.n.ris
k = 0)
mtext("Months", side=1, line=2)
title(main=paste("Overall survival by immunohistochemical type\n(n = ", samp
leSize, ")", sep = ""))
```

## Overall survival by immunohistochemical type (n = 79)

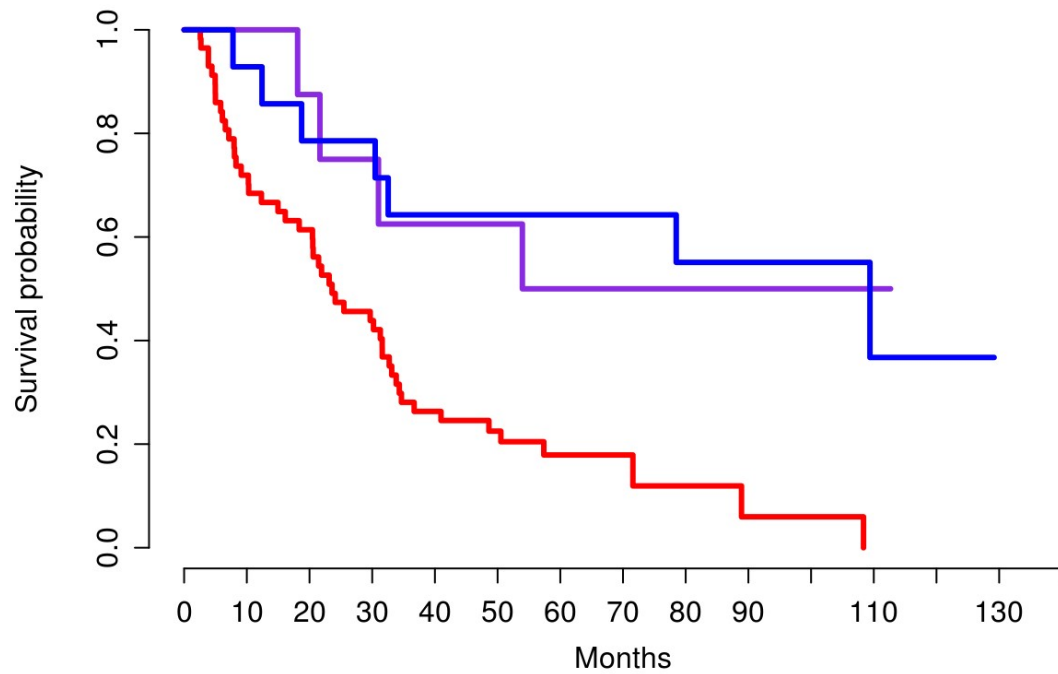

|    |    |    |    |    |    |   |   |   |   |   |   |  |  |  |                  |
|----|----|----|----|----|----|---|---|---|---|---|---|--|--|--|------------------|
| 57 | 41 | 35 | 25 | 15 | 11 | 7 | 3 | 2 | 1 | 1 |   |  |  |  | cluster=extrahe  |
| 8  | 8  | 7  | 6  | 5  | 5  | 4 | 2 | 2 | 1 | 1 | 1 |  |  |  | cluster=intestin |

```
# Univariate Cox proportional hazards regression model.
coxClusterUniv <- coxph(Surv(surv_time, death_observed) ~ cluster, data = re
sCompleteSurvData)
summary(coxClusterUniv)
```

```
## Call:
## coxph(formula = Surv(surv_time, death_observed) ~ cluster, data = resCompleteSurvData)
##
##      n= 79, number of events= 60
##      (7 observations deleted due to missingness)
##
##              coef exp(coef) se(coef)      z
## clusterintestinal      -1.1754    0.3087   0.5296 -2.220
## clusterintrahepatic cholangiocarcinoma -1.3495    0.2594   0.4335 -3.113
##              Pr(>|z|)
## clusterintestinal      0.02644 *
## clusterintrahepatic cholangiocarcinoma  0.00185 **
## ---
## Signif. codes:  0 '***' 0.001 '**' 0.01 '*' 0.05 '.' 0.1 ' ' 1
##
##              exp(coef) exp(-coef) lower .95
## clusterintestinal      0.3087      3.240    0.1093
## clusterintrahepatic cholangiocarcinoma  0.2594      3.856    0.1109
##              upper .95
## clusterintestinal      0.8715
## clusterintrahepatic cholangiocarcinoma  0.6066
##
## Concordance= 0.607 (se = 0.034 )
## Rsquare= 0.185 (max possible= 0.997 )
## Likelihood ratio test= 16.16 on 2 df,  p=0.0003099
## Wald test              = 12.79 on 2 df,  p=0.001673
## Score (logrank) test = 14.27 on 2 df,  p=0.0007961
```

```
# Test the Proportional Hazards Assumption of a Cox Regression
cox_pha <- cox.zph(coxClusterUniv)
print(cox_pha)
```

```
##              rho  chisq    p
## clusterintestinal      -0.0142 0.0126 0.911
## clusterintrahepatic cholangiocarcinoma -0.0755 0.3474 0.556
## GLOBAL                  NA 0.3479 0.840
```

```
plot(cox_pha)
```

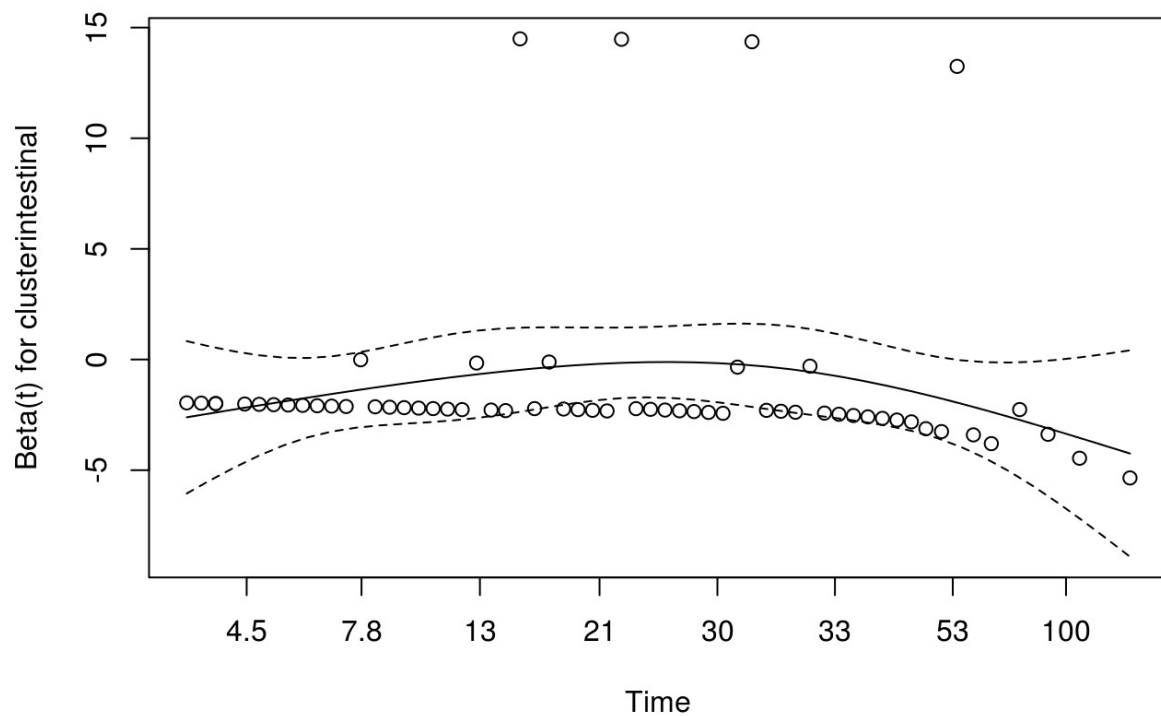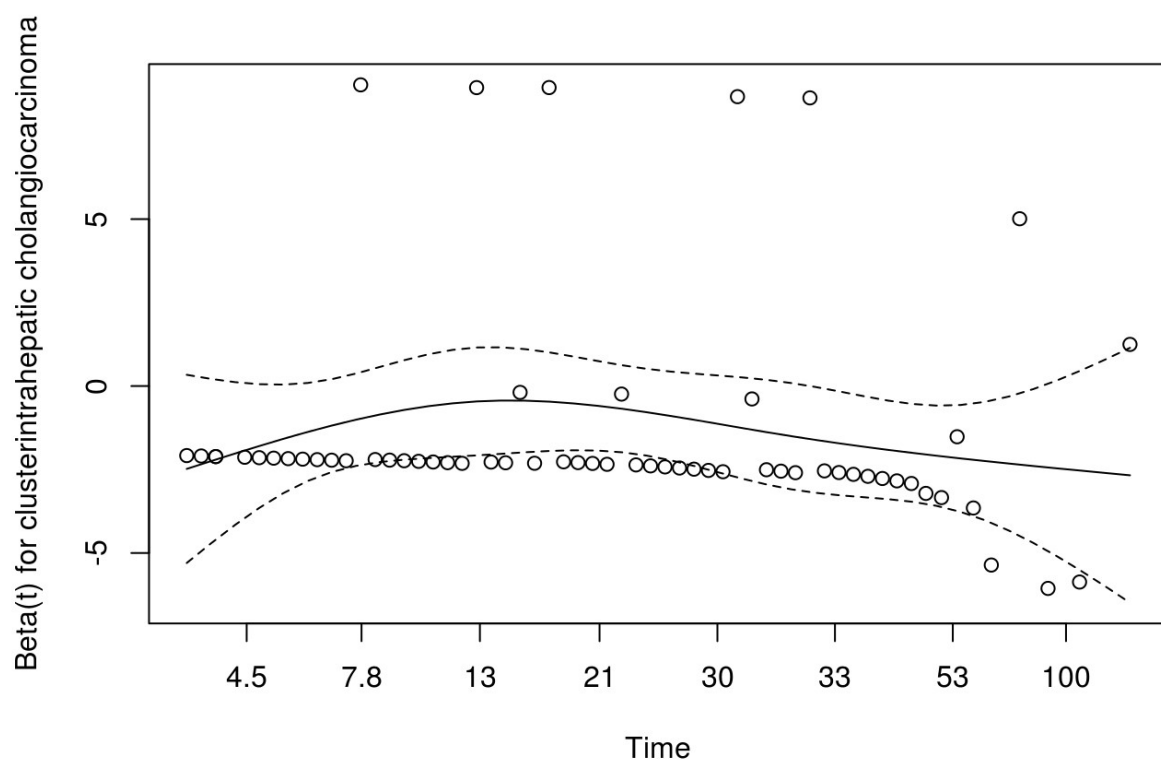

```
# Multivariate Cox proportional hazards regression model.
coxClusterMultiv <- coxph(Surv(surv_time, death_observed) ~ cluster + p_t +
p_n, data = resCompleteSurvData)
```

```
## Warning in fitter(X, Y, strats, offset, init, control, weights = weights,  
:  
## Loglik converged before variable 6 ; beta may be infinite.
```

```
summary(coxClusterMultiv)
```

```
## Call:
## coxph(formula = Surv(surv_time, death_observed) ~ cluster + p_t +
##       p_n, data = resCompleteSurvData)
##
##      n= 70, number of events= 55
##      (16 observations deleted due to missingness)
##
##               coef    exp(coef)    se(coef)
## clusterintestinal -1.662e+00  1.897e-01  6.787e-01
## clusterintrahepatic cholangiocarcinoma -4.988e-01  6.072e-01  5.231e-01
## p_t1              4.299e-01  1.537e+00  6.115e-01
## p_t2              2.360e-03  1.002e+00  3.289e-01
## p_t4              1.608e+00  4.995e+00  5.222e-01
## p_tis             -1.689e+01  4.608e-08  4.652e+03
## p_n0              -7.536e-01  4.707e-01  3.753e-01
##               z Pr(>|z|)
## clusterintestinal -2.449  0.01434 *
## clusterintrahepatic cholangiocarcinoma -0.953  0.34034
## p_t1              0.703  0.48207
## p_t2              0.007  0.99427
## p_t4              3.080  0.00207 **
## p_tis             -0.004  0.99710
## p_n0             -2.008  0.04467 *
## ---
## Signif. codes:  0 '***' 0.001 '**' 0.01 '*' 0.05 '.' 0.1 ' ' 1
##
##               exp(coef) exp(-coef) lower .95
## clusterintestinal  1.897e-01  5.270e+00  0.05017
## clusterintrahepatic cholangiocarcinoma 6.072e-01  1.647e+00  0.21780
## p_t1              1.537e+00  6.506e-01  0.46365
## p_t2              1.002e+00  9.976e-01  0.52608
## p_t4              4.995e+00  2.002e-01  1.79505
## p_tis             4.608e-08  2.170e+07  0.00000
## p_n0              4.707e-01  2.125e+00  0.22556
##               upper .95
## clusterintestinal  0.7177
## clusterintrahepatic cholangiocarcinoma  1.6930
## p_t1              5.0954
## p_t2              1.9098
## p_t4             13.9003
## p_tis              Inf
## p_n0              0.9822
##
## Concordance= 0.689 (se = 0.042 )
## Rsquare= 0.299 (max possible= 0.997 )
## Likelihood ratio test= 24.9 on 7 df,  p=0.000792
## Wald test = 20.41 on 7 df,  p=0.00474
## Score (logrank) test = 24 on 7 df,  p=0.001141
```

```
# Test the Proportional Hazards Assumption of a Cox Regression
cox_pha <- cox.zph(coxClusterMultiv)
print(cox_pha)
```

```
##               rho      chisq      p
## clusterintestinal      0.0152 2.00e-02 0.8875
## clusterintrahepatic cholangiocarcinoma -0.1989 2.66e+00 0.1028
## p_t1      0.0651 2.24e-01 0.6359
## p_t2     -0.2231 2.64e+00 0.1043
## p_t4     -0.1254 1.19e+00 0.2753
## p_tis    -0.4390 6.24e-08 0.9998
## p_n0      0.2282 2.85e+00 0.0915
## GLOBAL              NA 9.26e+00 0.2345
```

```
plot(cox_pha)
```

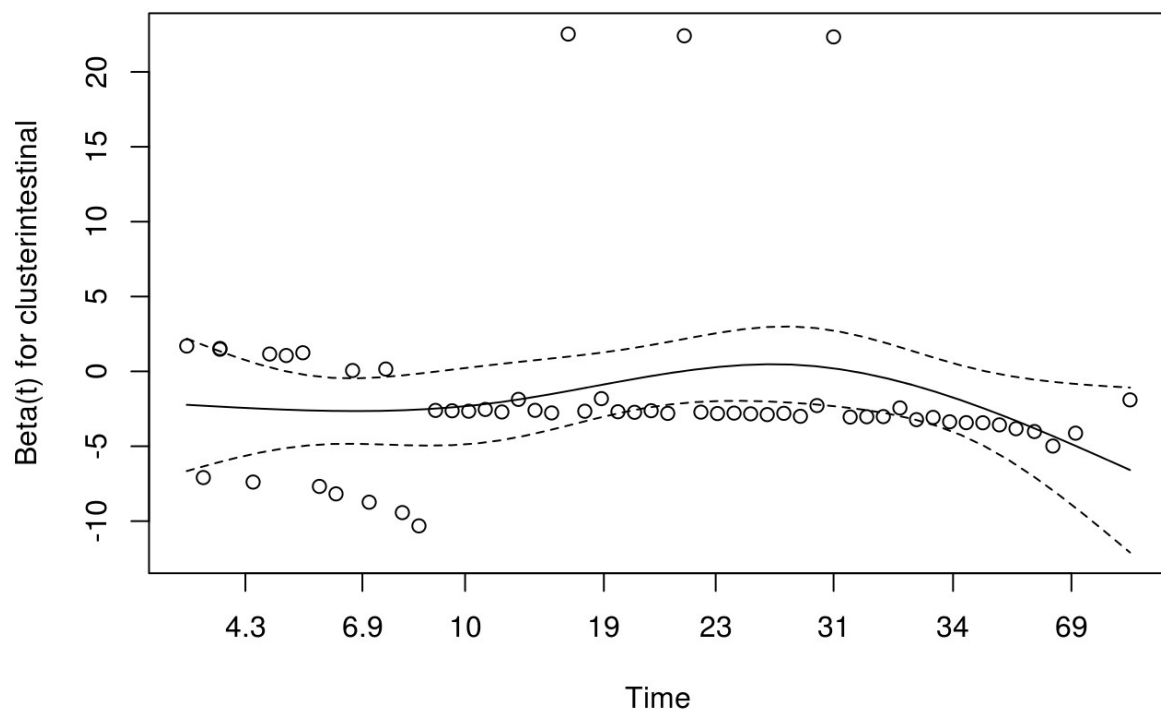

Beta(t) for clusterintrahepatic cholangiocarcinoma

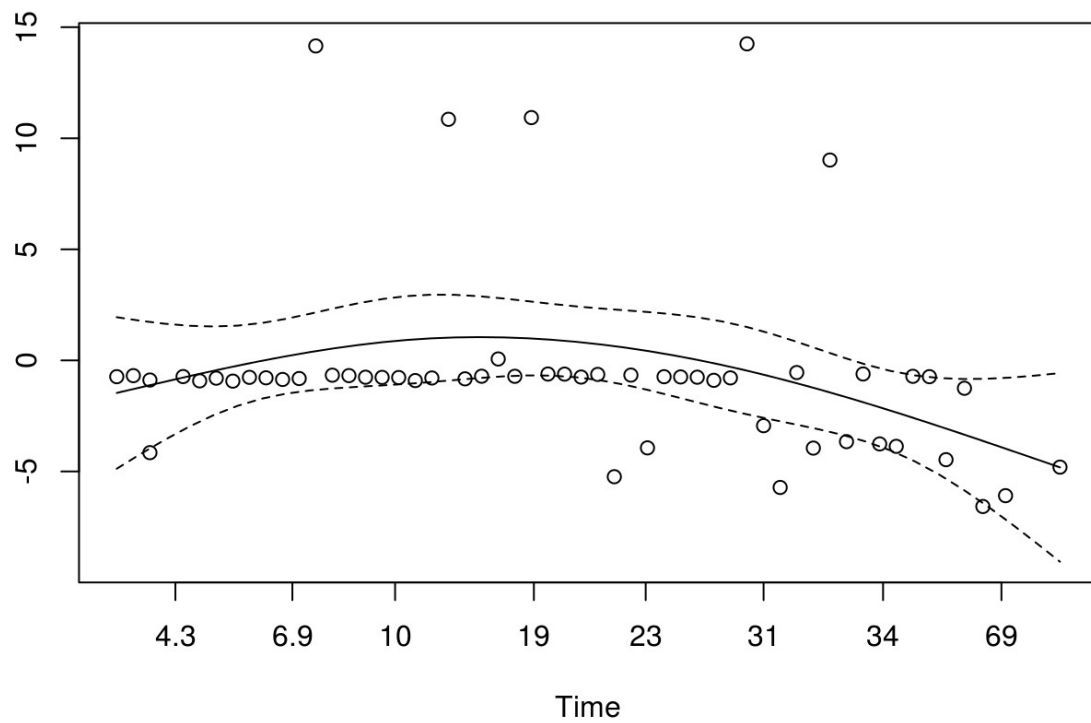

Beta(t) for p\_t1

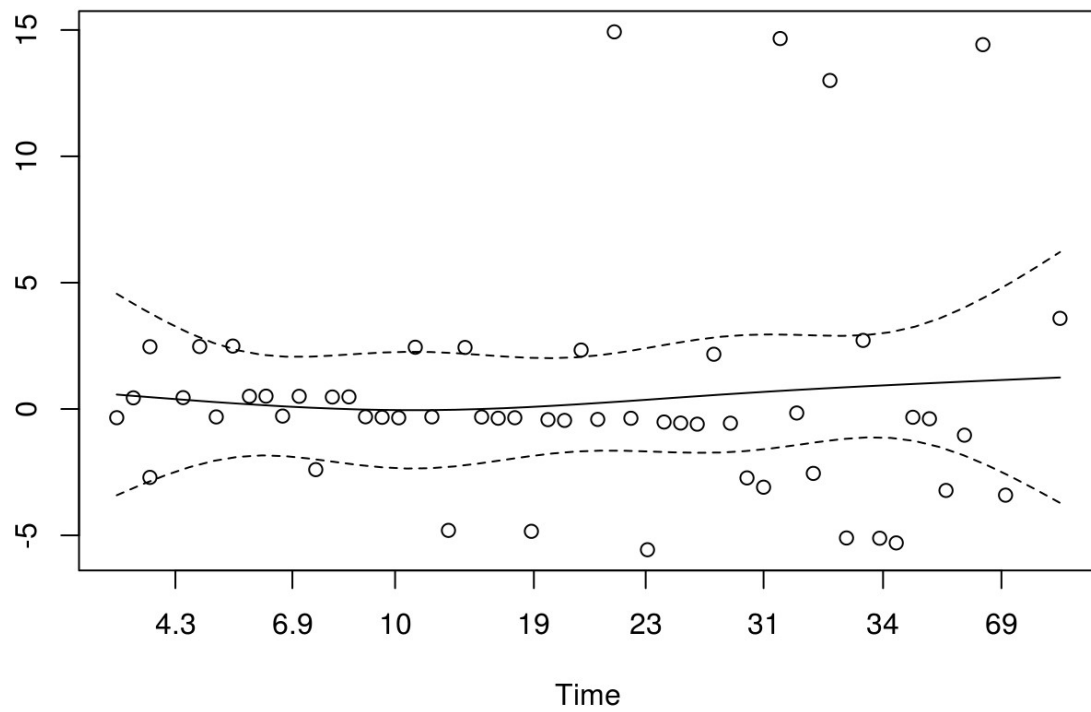

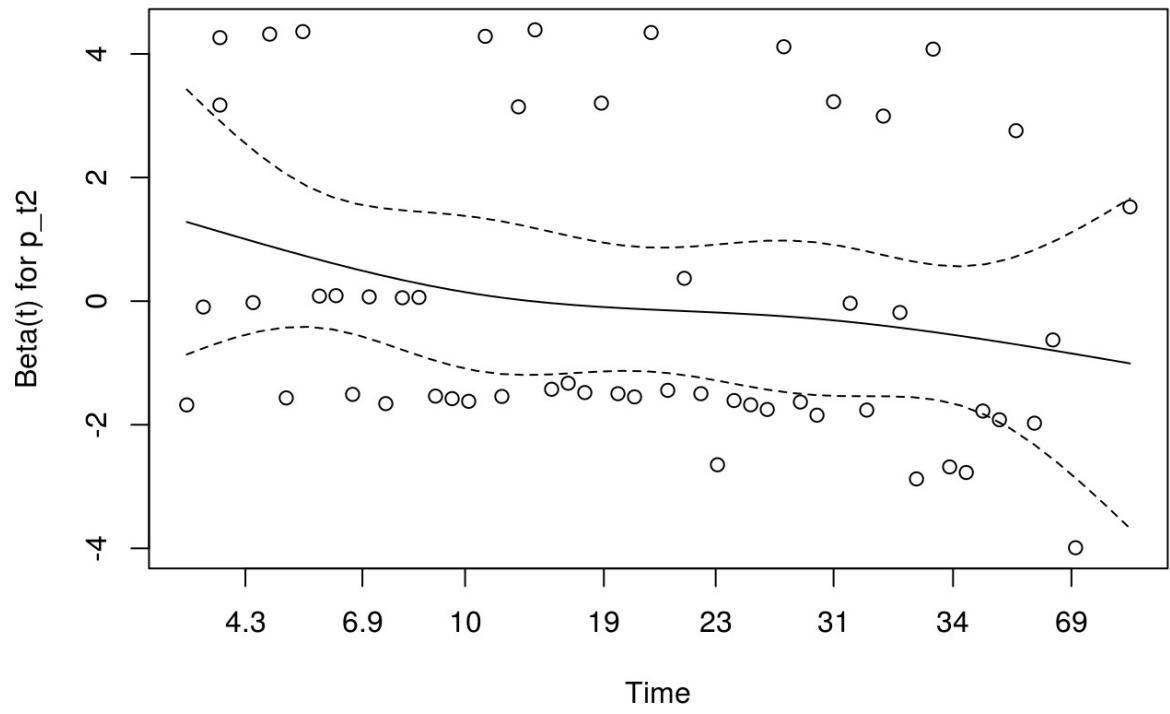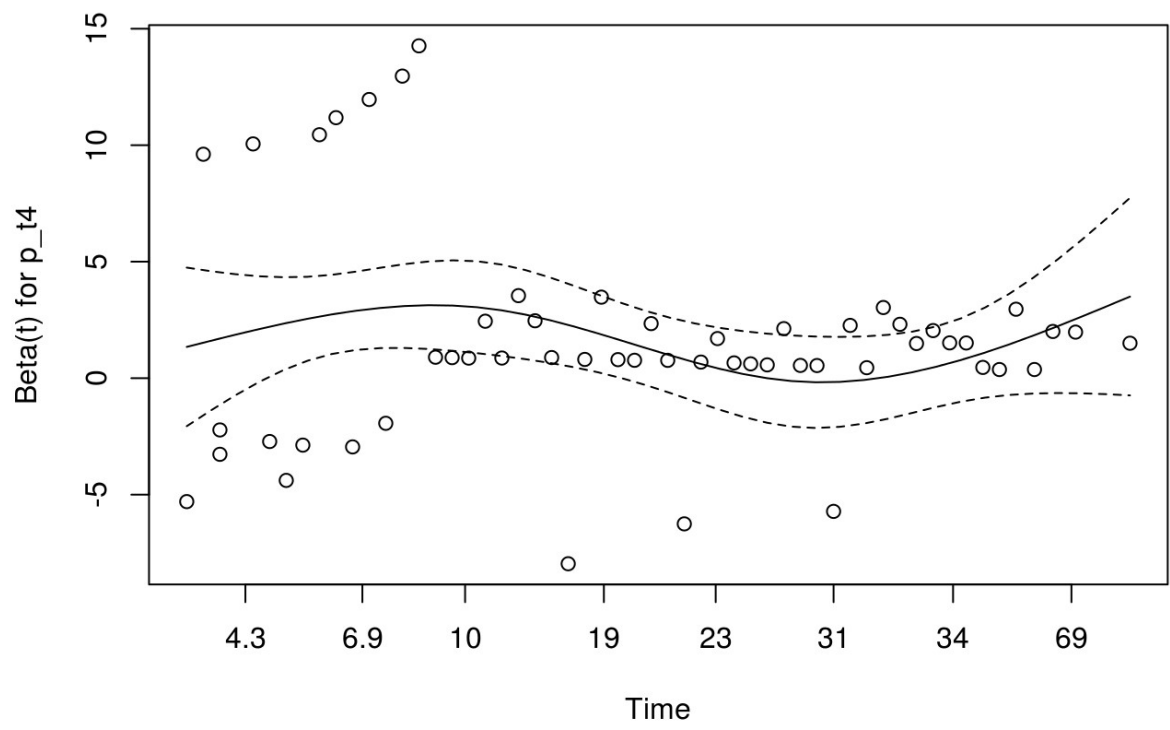

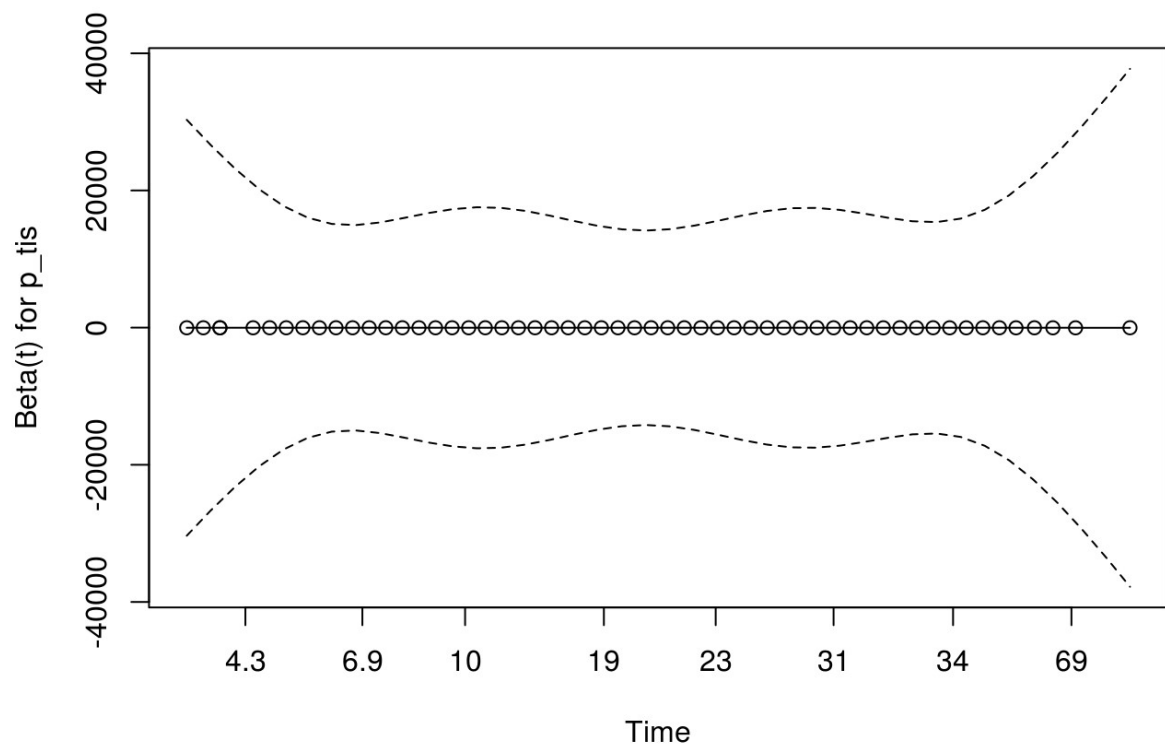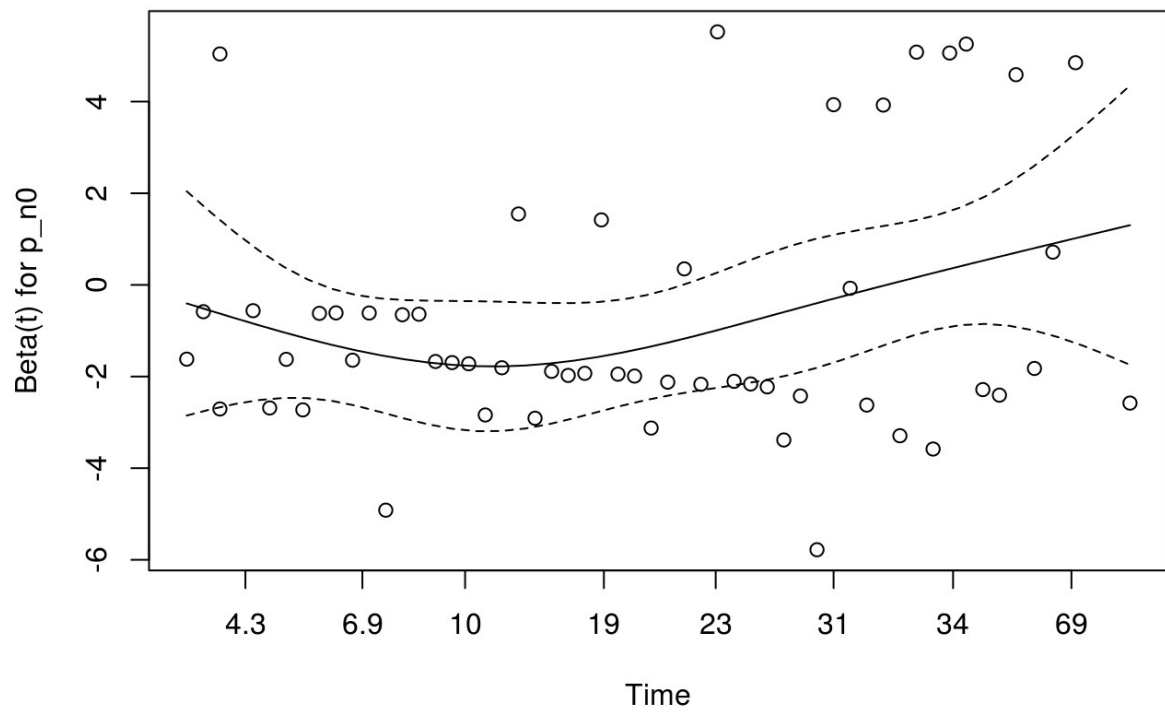

```
# Adjusted Akaike information criterion, Bayesian information criteria. The
smaller the AIC or BIC, the better the fit.
round(AICc(coxClusterMultiv, return.K = FALSE, second.ord = TRUE))
```

```
## [1] 389
```

```
round(BIC(coxClusterMultiv))
```

```
## [1] 403
```

## Survival table data - univariate: immunohistochemical type (cluster)

```
rowsOfInterest <- c( paste("cluster", levels(resCompleteSurvData$cluster)
[2 : length(levels(resCompleteSurvData$cluster))], sep=""))
myXtable <- xtable(getCoxTable(coxClusterUniv, rowsOfInterest), caption = 'S
urvival table data - univariate: immunohistochemical type (cluster)')
digits(myXtable) <- c(0,2,2,2,3)
print(myXtable, type = "html", caption.placement = 'top')
```

### Survival table data - univariate: immunohistochemical type (cluster)

|                                        | HR   | LCI  | UCI  | p     |
|----------------------------------------|------|------|------|-------|
| clusterintestinal                      | 0.31 | 0.11 | 0.87 | 0.026 |
| clusterintrahepatic cholangiocarcinoma | 0.26 | 0.11 | 0.61 | 0.002 |

## Survival table data - multivariate: immunohistochemical type (cluster)

```
myXtable <- xtable(getCoxTable(coxClusterMultiv, rowsOfInterest), caption =
'Survival table data - multivariate: immunohistochemical type (cluster)')
digits(myXtable) <- c(0,2,2,2,3)
print(myXtable, type = "html", caption.placement = 'top')
```

### Survival table data - multivariate: immunohistochemical type (cluster)

|                                        | HR   | LCI  | UCI  | p     |
|----------------------------------------|------|------|------|-------|
| clusterintestinal                      | 0.19 | 0.05 | 0.72 | 0.014 |
| clusterintrahepatic cholangiocarcinoma | 0.61 | 0.22 | 1.69 | 0.340 |

## Anatomically-based diagnosis

```
# Missing data check
table(is.na(resCompleteSurvData$clin_diag))
```

```
##
## FALSE
##      86
```

```
# -Resected patients, by clin_diag
clin_res_PcbilSurvFit <- npsurv(formula = Surv(surv_time, death_observed) ~
clin_diag, data = resCompleteSurvData)
print(clin_res_PcbilSurvFit, print.rmean = TRUE)
```

```
## Call: npsurv(formula = Surv(surv_time, death_observed) ~ clin_diag,
##      data = resCompleteSurvData)
##
##
##                                records n.max n.start events
## clin_diag=Ductal pancreatic adenocarcinoma      30      30      30      25
## clin_diag=Ampullary carcinoma                   12      12      12      10
## clin_diag=Distal bile duct cancer                 6       6       6       4
## clin_diag=Gallbladder cancer                     11      11      11       9
## clin_diag=Perihilar cholangiocarcinoma            9       9       9       4
## clin_diag=Intrahepatic cholangiocarcinoma         18      18      18      11
##
##                                *rmean *se(rmean) median
## clin_diag=Ductal pancreatic adenocarcinoma    33.8        6.74   19.4
## clin_diag=Ampullary carcinoma                 46.0       11.26   31.4
## clin_diag=Distal bile duct cancer              57.0       13.09   59.7
## clin_diag=Gallbladder cancer                   36.8       10.32   25.5
## clin_diag=Perihilar cholangiocarcinoma         77.3       12.39    NA
## clin_diag=Intrahepatic cholangiocarcinoma      59.0       11.05   55.8
##
##                                0.95LCL 0.95UCL
## clin_diag=Ductal pancreatic adenocarcinoma    10.2        41
## clin_diag=Ampullary carcinoma                 21.7        NA
## clin_diag=Distal bile duct cancer              23.1        NA
## clin_diag=Gallbladder cancer                   20.5        NA
## clin_diag=Perihilar cholangiocarcinoma         33.8        NA
## clin_diag=Intrahepatic cholangiocarcinoma      12.4        NA
##      * restricted mean with upper limit = 111
```

```
# KM
sampleSize <- sum(!is.na(resCompleteSurvData$clin_diag))
survplot(clin_res_PcbilSurvFit, conf = "none", label.curves = FALSE, time.in
c = 10, n.risk = TRUE,
        col = c("red", "black", "deeppink", "purple", "yellow", "blue", "gr
een"), lty = 1, lwd = 3, cex.n.risk = 0.8, y.n.risk = -0.6,
        xlab="", ylab = "Survival probability", adj.n.risk = 0)
mtext("Months", side=1, line=2)
title(main=paste("Overall survival by anatomical diagnosis\n(n = ", sampleSi
ze, ")", sep = ""))
```

## Overall survival by anatomical diagnosis (n = 86)

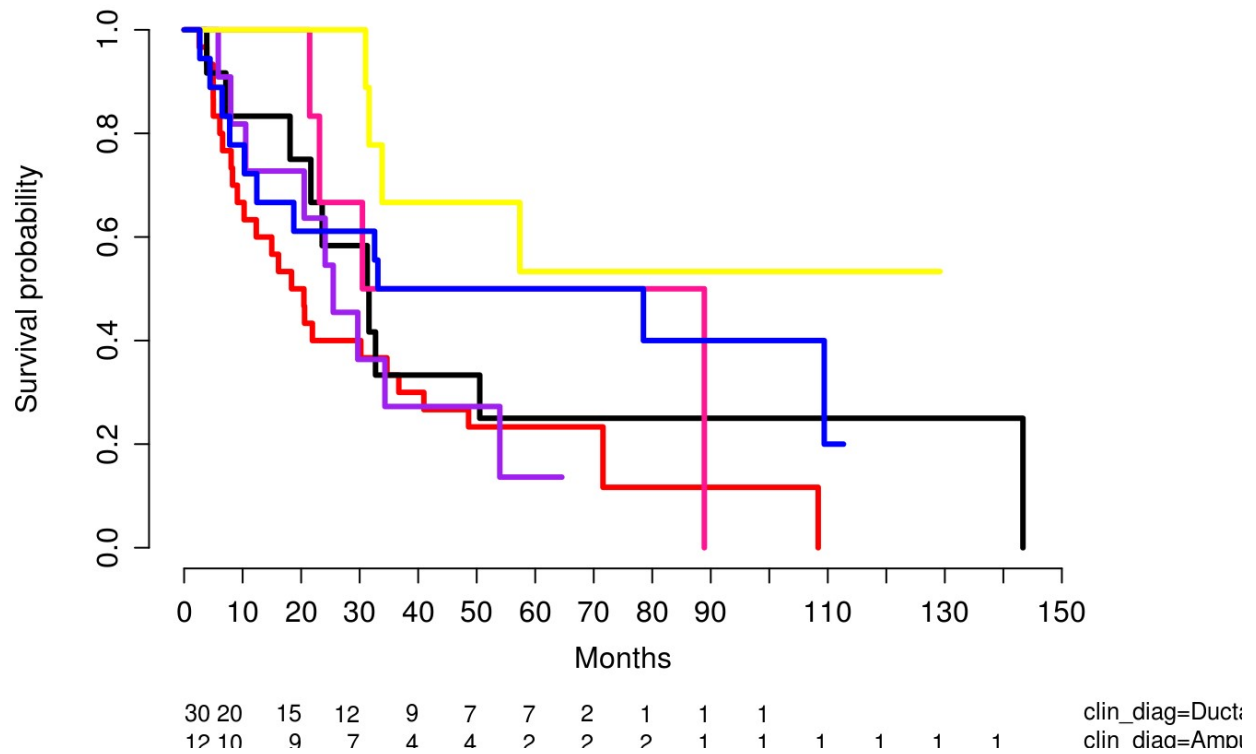

```
# Univariate:
coxClinDiagUniv <- coxph(Surv(surv_time, death_observed) ~ clin_diag, data
= resCompleteSurvData)
summary(coxClinDiagUniv)
```

```
## Call:
## coxph(formula = Surv(surv_time, death_observed) ~ clin_diag,
##       data = resCompleteSurvData)
##
##      n= 86, number of events= 63
##
##
##               coef exp(coef) se(coef)
## clin_diagAmpullary carcinoma      -0.41458    0.66062  0.39196
## clin_diagDistal bile duct cancer  -0.65762    0.51808  0.53993
## clin_diagGallbladder cancer      -0.09732    0.90727  0.39026
## clin_diagPerihilar cholangiocarcinoma -1.40524    0.24531  0.54573
## clin_diagIntrahepatic cholangiocarcinoma -0.72080    0.48636  0.36897
##
##               z Pr(>|z|)
## clin_diagAmpullary carcinoma      -1.058    0.2902
## clin_diagDistal bile duct cancer  -1.218    0.2232
## clin_diagGallbladder cancer      -0.249    0.8031
## clin_diagPerihilar cholangiocarcinoma -2.575    0.0100 *
## clin_diagIntrahepatic cholangiocarcinoma -1.954    0.0508 .
## ---
## Signif. codes:  0 '***' 0.001 '**' 0.01 '*' 0.05 '.' 0.1 ' ' 1
##
##               exp(coef) exp(-coef) lower .95
## clin_diagAmpullary carcinoma      0.6606      1.514    0.30642
## clin_diagDistal bile duct cancer    0.5181      1.930    0.17981
## clin_diagGallbladder cancer      0.9073      1.102    0.42223
## clin_diagPerihilar cholangiocarcinoma 0.2453      4.076    0.08418
## clin_diagIntrahepatic cholangiocarcinoma 0.4864      2.056    0.23599
##
##               upper .95
## clin_diagAmpullary carcinoma      1.4242
## clin_diagDistal bile duct cancer    1.4928
## clin_diagGallbladder cancer      1.9495
## clin_diagPerihilar cholangiocarcinoma 0.7149
## clin_diagIntrahepatic cholangiocarcinoma 1.0024
##
## Concordance= 0.616 (se = 0.039 )
## Rsquare= 0.119 (max possible= 0.996 )
## Likelihood ratio test= 10.94 on 5 df, p=0.05249
## Wald test              = 9.46 on 5 df, p=0.09216
## Score (logrank) test = 10.25 on 5 df, p=0.06846
```

```
# Test the Proportional Hazards Assumption of a Cox Regression
cox_pha <- cox.zph(coxClinDiagUniv)
print(cox_pha)
```

| ## |                                          | rho     | chisq | p     |
|----|------------------------------------------|---------|-------|-------|
| ## | clin_diagAmpullary carcinoma             | 0.0415  | 0.110 | 0.740 |
| ## | clin_diagDistal bile duct cancer         | 0.1641  | 1.604 | 0.205 |
| ## | clin_diagGallbladder cancer              | 0.1402  | 1.212 | 0.271 |
| ## | clin_diagPerihilar cholangiocarcinoma    | 0.1392  | 1.249 | 0.264 |
| ## | clin_diagIntrahepatic cholangiocarcinoma | -0.0904 | 0.508 | 0.476 |
| ## | GLOBAL                                   | NA      | 5.032 | 0.412 |

```
plot(cox_pha)
```

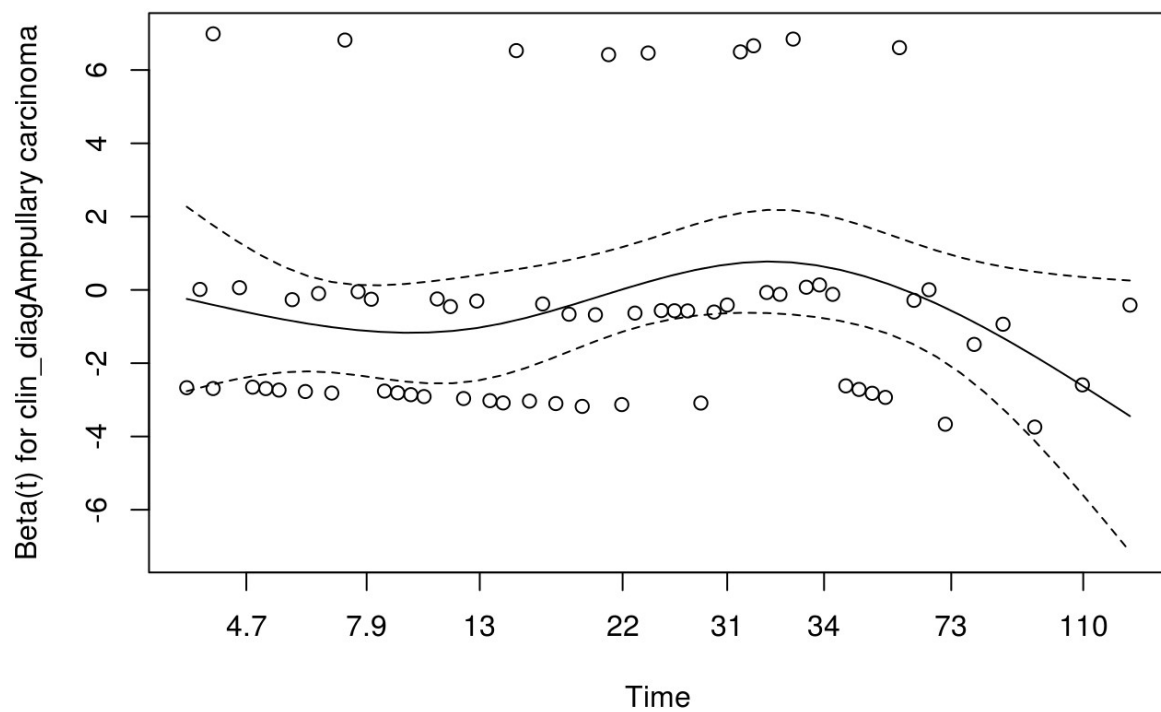

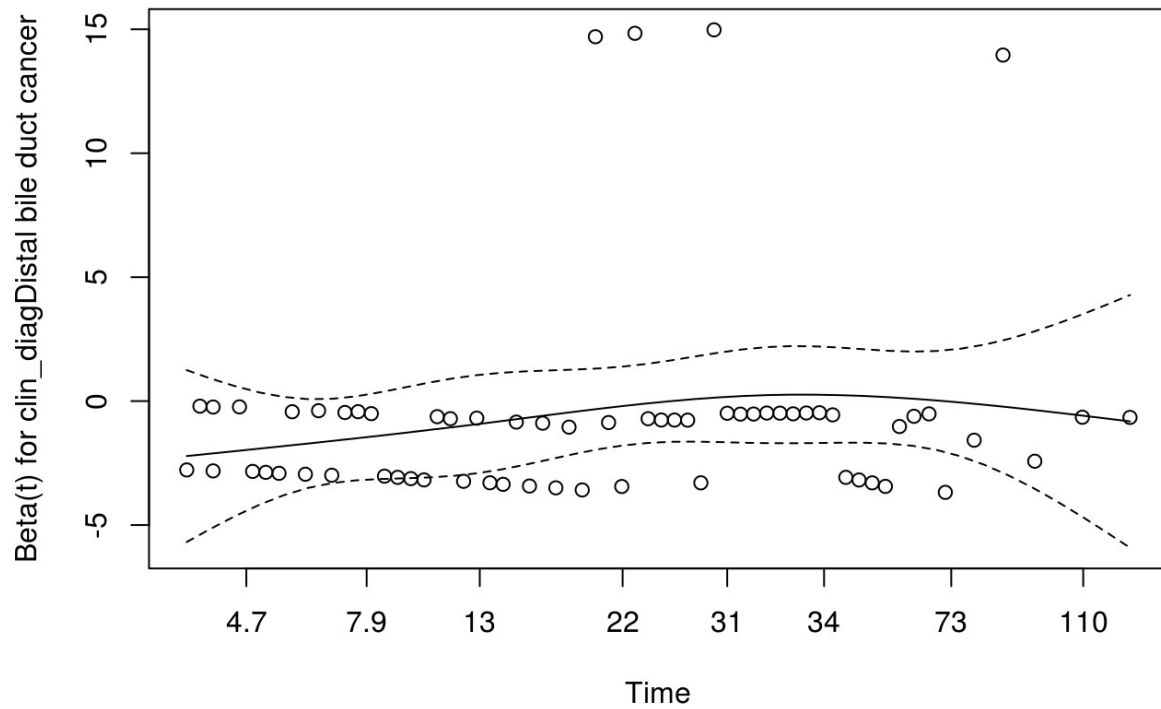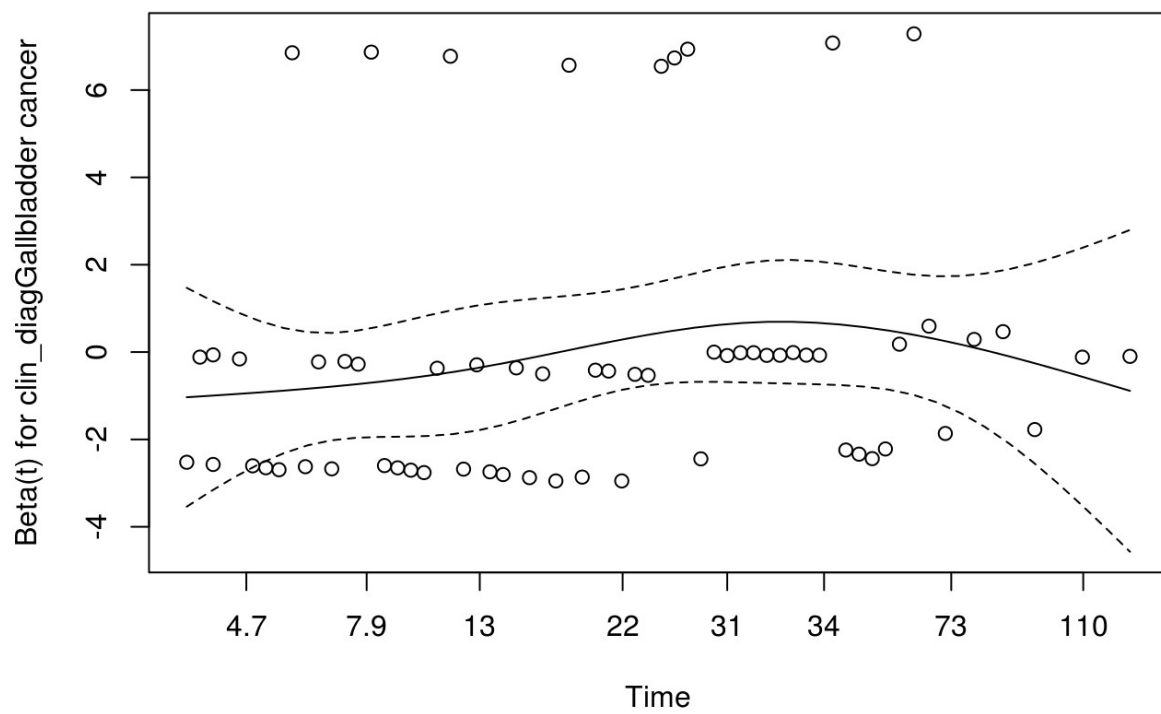

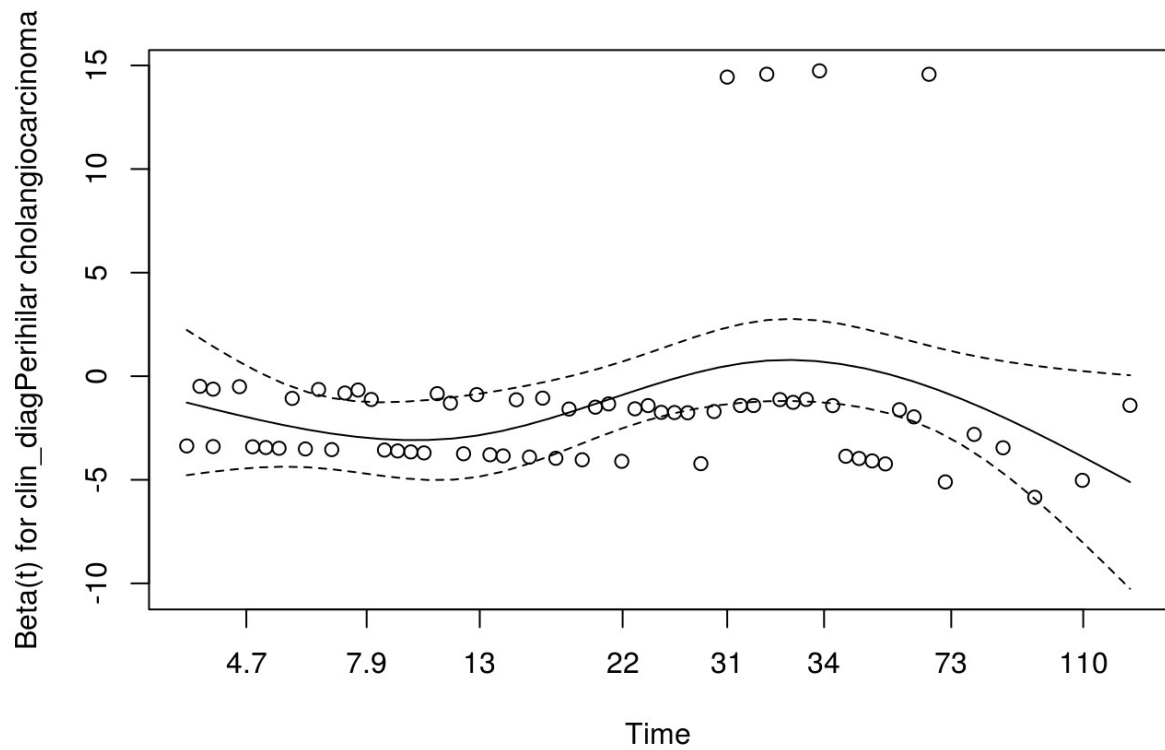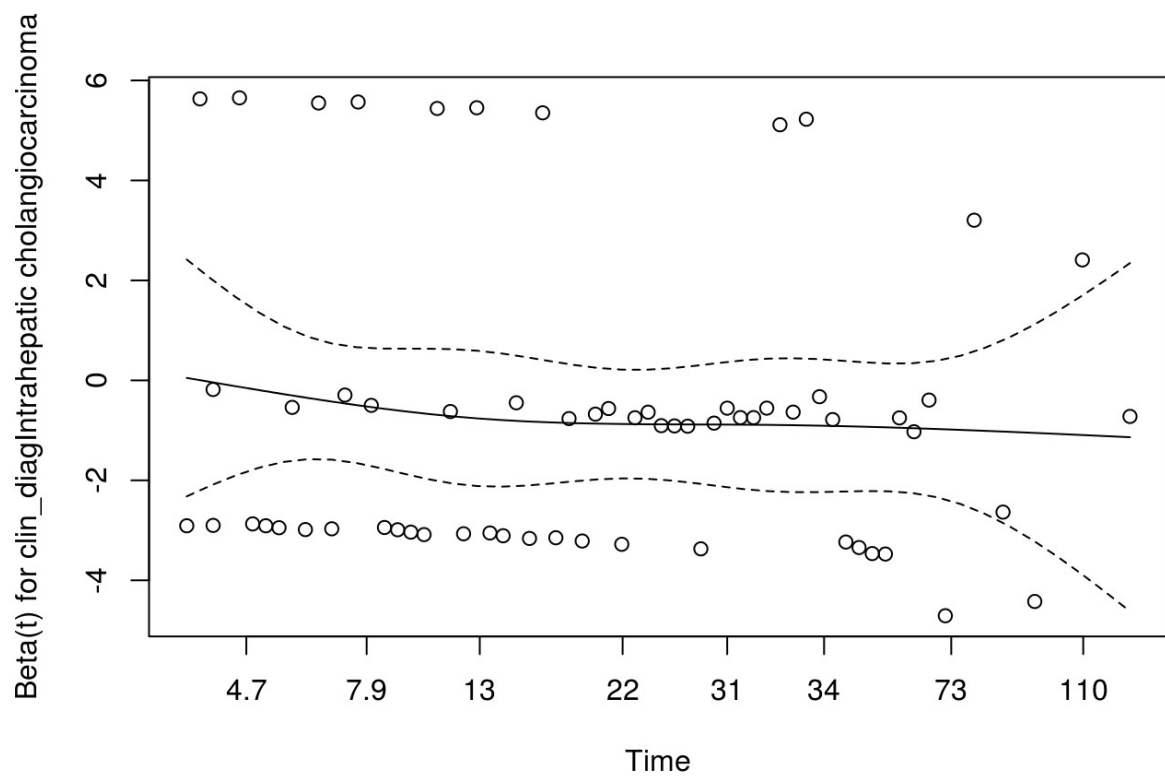

```
# Multivariate Cox proportional hazards regression model.
coxClinDiagMultiv <- coxph(Surv(surv_time, death_observed) ~ clin_diag + p_
t + p_n, data = resCompleteSurvData)
```

```
## Warning in fitter(X, Y, strats, offset, init, control, weights = weights,  
:  
## Loglik converged before variable 9 ; beta may be infinite.
```

```
summary(coxClinDiagMultiv)
```

```
## Call:
## coxph(formula = Surv(surv_time, death_observed) ~ clin_diag +
##       p_t + p_n, data = resCompleteSurvData)
##
##      n= 76, number of events= 58
##      (10 observations deleted due to missingness)
##
##               coef      exp(coef)    se(coef)
## clin_diagAmpullary carcinoma      -1.062e-01   8.993e-01   4.175e-01
## clin_diagDistal bile duct cancer    -3.861e-01   6.797e-01   6.233e-01
## clin_diagGallbladder cancer         3.349e-01   1.398e+00   4.408e-01
## clin_diagPerihilar cholangiocarcinoma -5.372e-01   5.844e-01   5.822e-01
## clin_diagIntrahepatic cholangiocarcinoma 5.767e-01   1.780e+00   4.455e-01
## p_t1      -1.768e-02   9.825e-01   6.289e-01
## p_t2      -1.153e-01   8.911e-01   3.507e-01
## p_t4       8.956e-01   2.449e+00   4.239e-01
## p_tis     -1.614e+01   9.739e-08   3.088e+03
## p_n0      -8.557e-01   4.250e-01   3.675e-01
##
##               z Pr(>|z|)
## clin_diagAmpullary carcinoma      -0.254   0.7992
## clin_diagDistal bile duct cancer    -0.620   0.5356
## clin_diagGallbladder cancer         0.760   0.4474
## clin_diagPerihilar cholangiocarcinoma -0.923   0.3561
## clin_diagIntrahepatic cholangiocarcinoma 1.295   0.1955
## p_t1      -0.028   0.9776
## p_t2      -0.329   0.7423
## p_t4       2.113   0.0346 *
## p_tis     -0.005   0.9958
## p_n0      -2.329   0.0199 *
## ---
## Signif. codes:  0 '***' 0.001 '**' 0.01 '*' 0.05 '.' 0.1 ' ' 1
##
##               exp(coef) exp(-coef) lower .95
## clin_diagAmpullary carcinoma      8.993e-01   1.112e+00   0.3968
## clin_diagDistal bile duct cancer    6.797e-01   1.471e+00   0.2003
## clin_diagGallbladder cancer         1.398e+00   7.154e-01   0.5892
## clin_diagPerihilar cholangiocarcinoma 5.844e-01   1.711e+00   0.1867
## clin_diagIntrahepatic cholangiocarcinoma 1.780e+00   5.618e-01   0.7435
## p_t1      9.825e-01   1.018e+00   0.2864
## p_t2      8.911e-01   1.122e+00   0.4481
## p_t4      2.449e+00   4.083e-01   1.0670
## p_tis     9.739e-08   1.027e+07   0.0000
## p_n0      4.250e-01   2.353e+00   0.2068
##
##               upper .95
## clin_diagAmpullary carcinoma      2.0381
## clin_diagDistal bile duct cancer    2.3059
## clin_diagGallbladder cancer         3.3165
## clin_diagPerihilar cholangiocarcinoma 1.8291
## clin_diagIntrahepatic cholangiocarcinoma 4.2623
## p_t1      3.3699
## p_t2      1.7718
## p_t4      5.6203
```

```
## p_tis                               Inf
## p_n0                               0.8733
##
## Concordance= 0.705 (se = 0.042 )
## Rsquare= 0.271 (max possible= 0.996 )
## Likelihood ratio test= 23.97 on 10 df, p=0.007671
## Wald test = 20.43 on 10 df, p=0.02542
## Score (logrank) test = 25.14 on 10 df, p=0.005084
```

```
# Test the Proportional Hazards Assumption of a Cox Regression
cox_pha <- cox.zph(coxClinDiagMultiv)
print(cox_pha)
```

```
##                               rho    chisq      p
## clin_diagAmpullary carcinoma -0.0251 3.99e-02 0.8416
## clin_diagDistal bile duct cancer 0.0712 2.84e-01 0.5940
## clin_diagGallbladder cancer 0.1811 1.95e+00 0.1629
## clin_diagPerihilar cholangiocarcinoma 0.0947 4.89e-01 0.4845
## clin_diagIntrahepatic cholangiocarcinoma -0.1326 1.24e+00 0.2646
## p_t1 0.1180 8.35e-01 0.3609
## p_t2 -0.1171 8.33e-01 0.3614
## p_t4 -0.2832 4.72e+00 0.0298
## p_tis -0.3621 2.06e-07 0.9996
## p_n0 0.1456 1.14e+00 0.2859
## GLOBAL NA 1.43e+01 0.1596
```

```
plot(cox_pha)
```

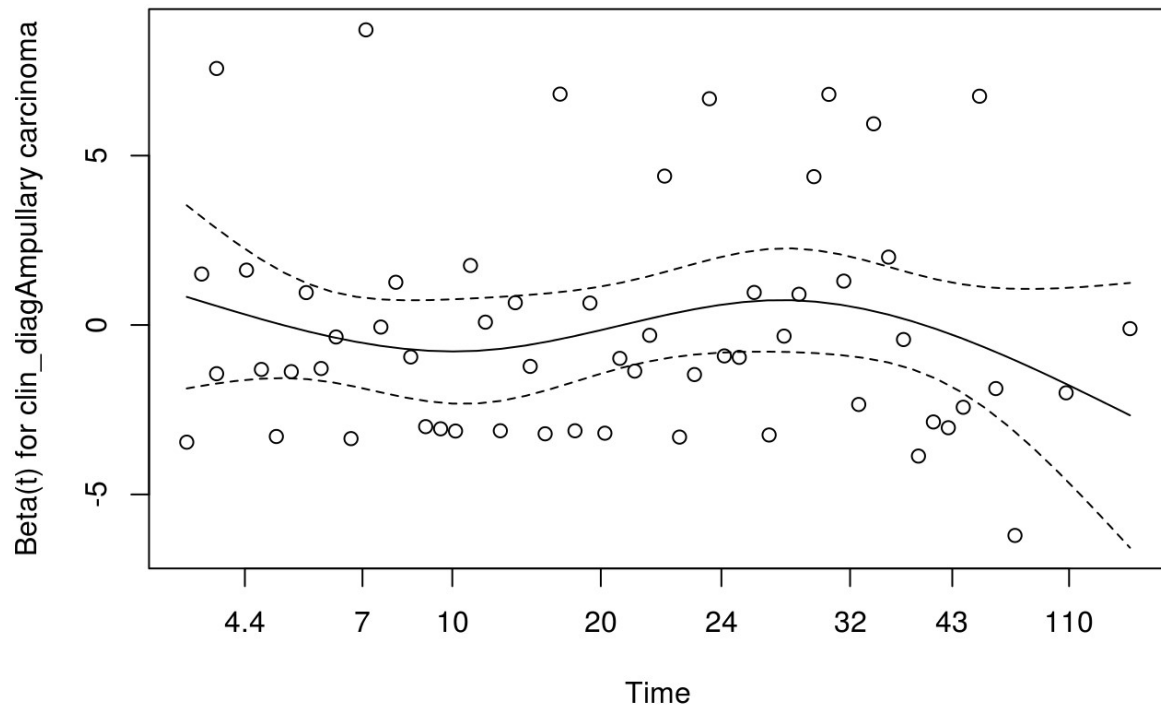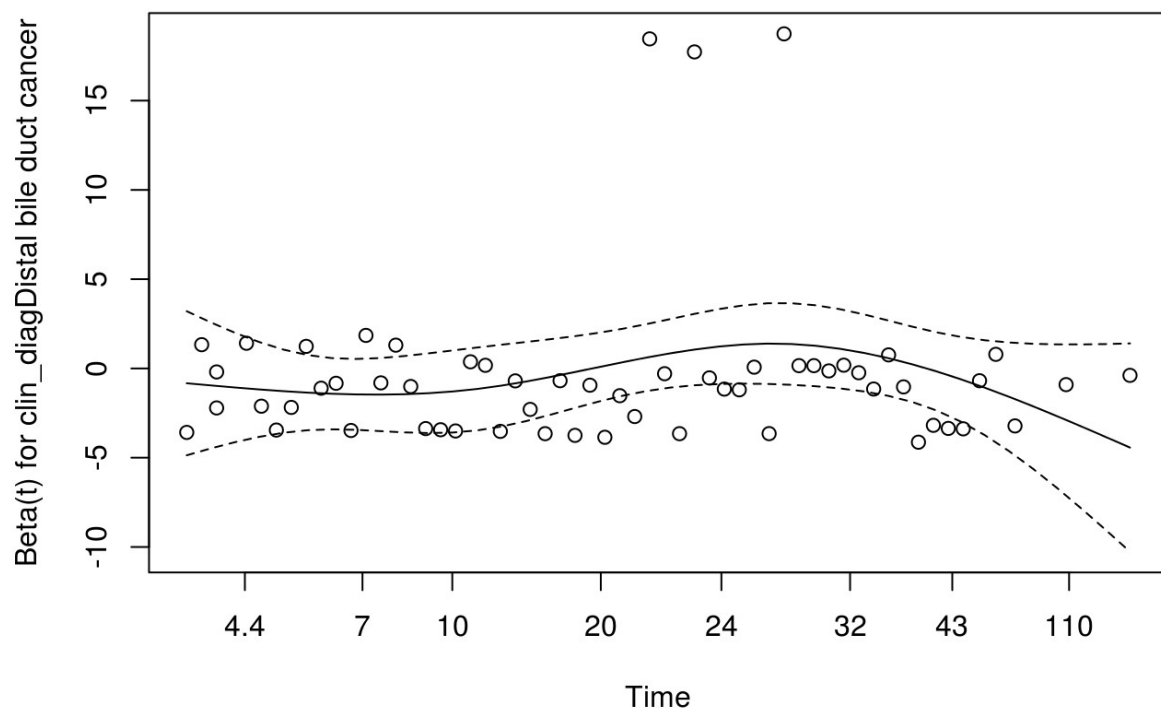

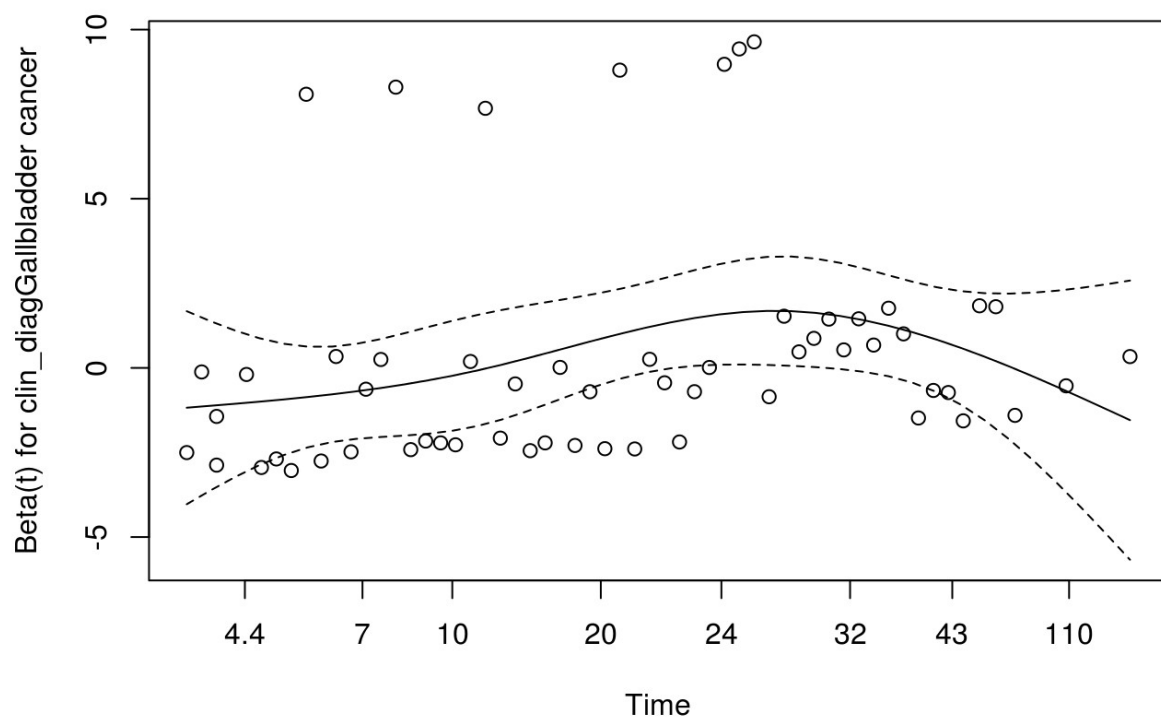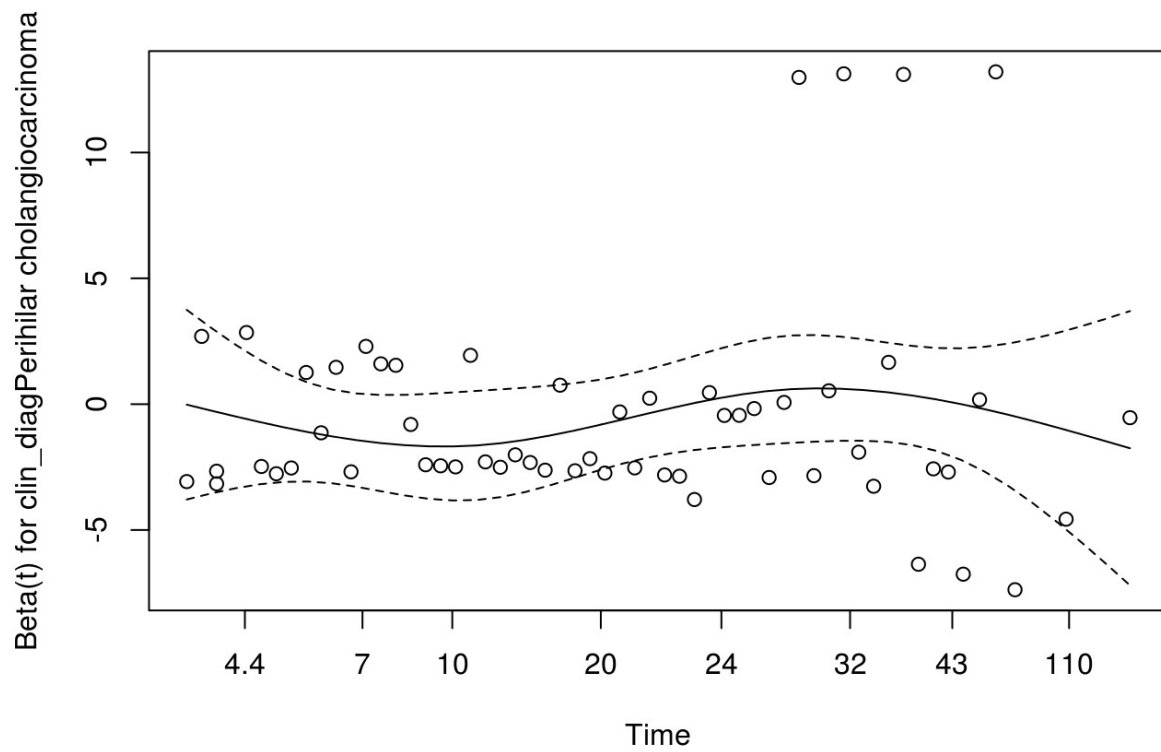

Beta(t) for clin\_diagIntrahepatic cholangiocarcinoma

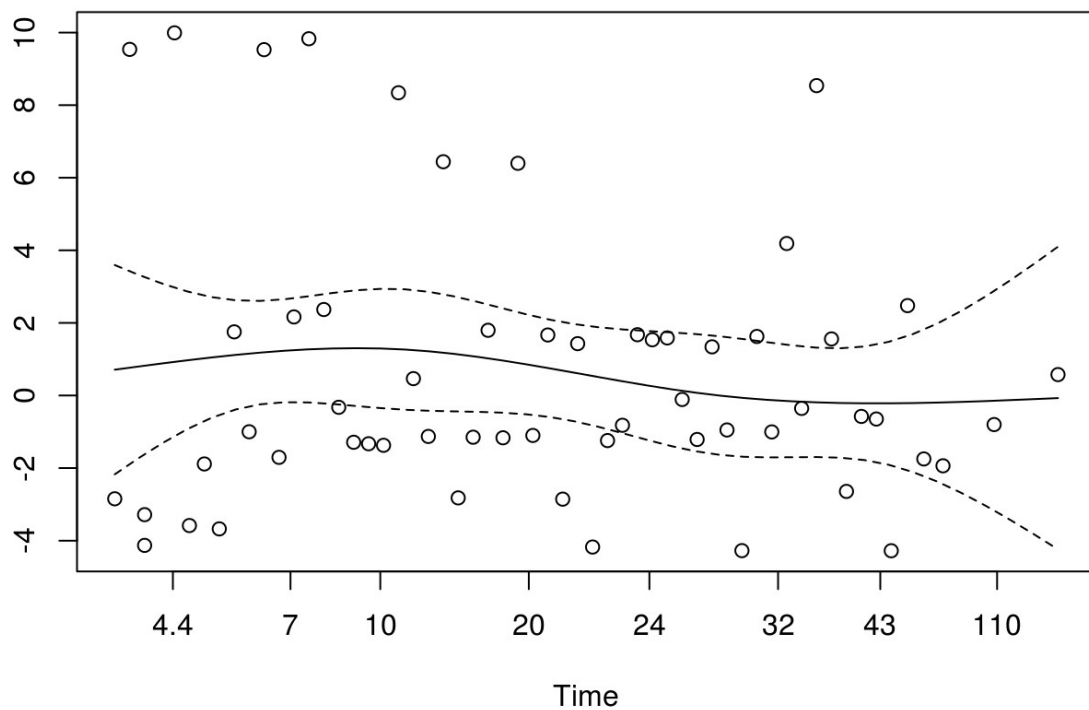

Beta(t) for p\_t1

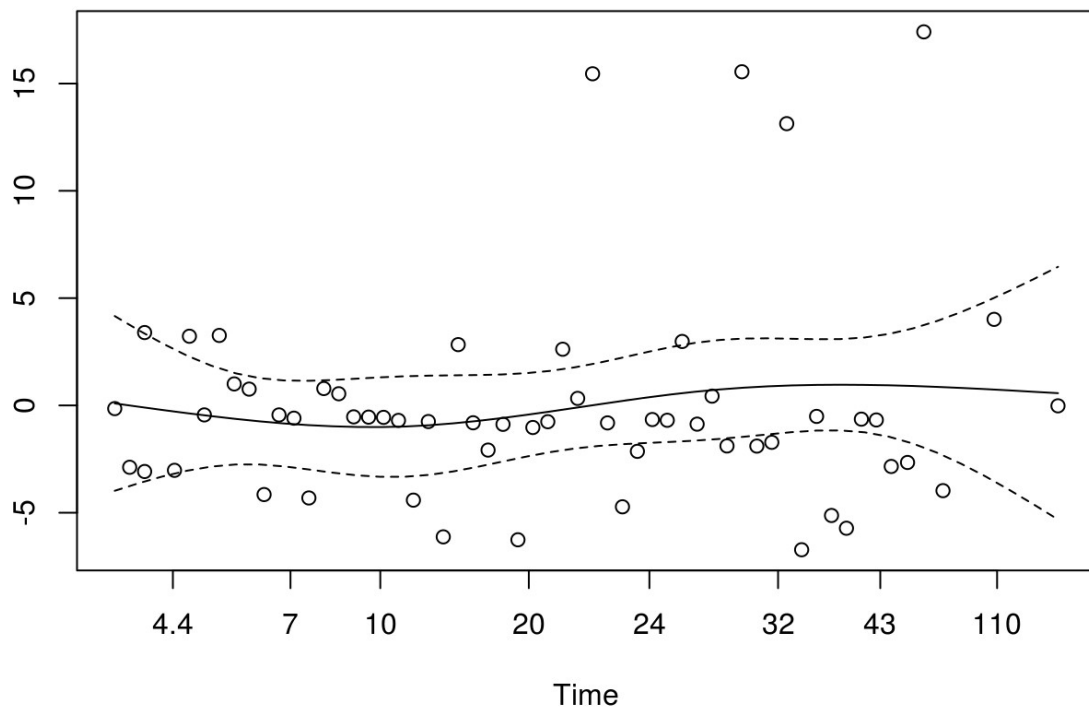

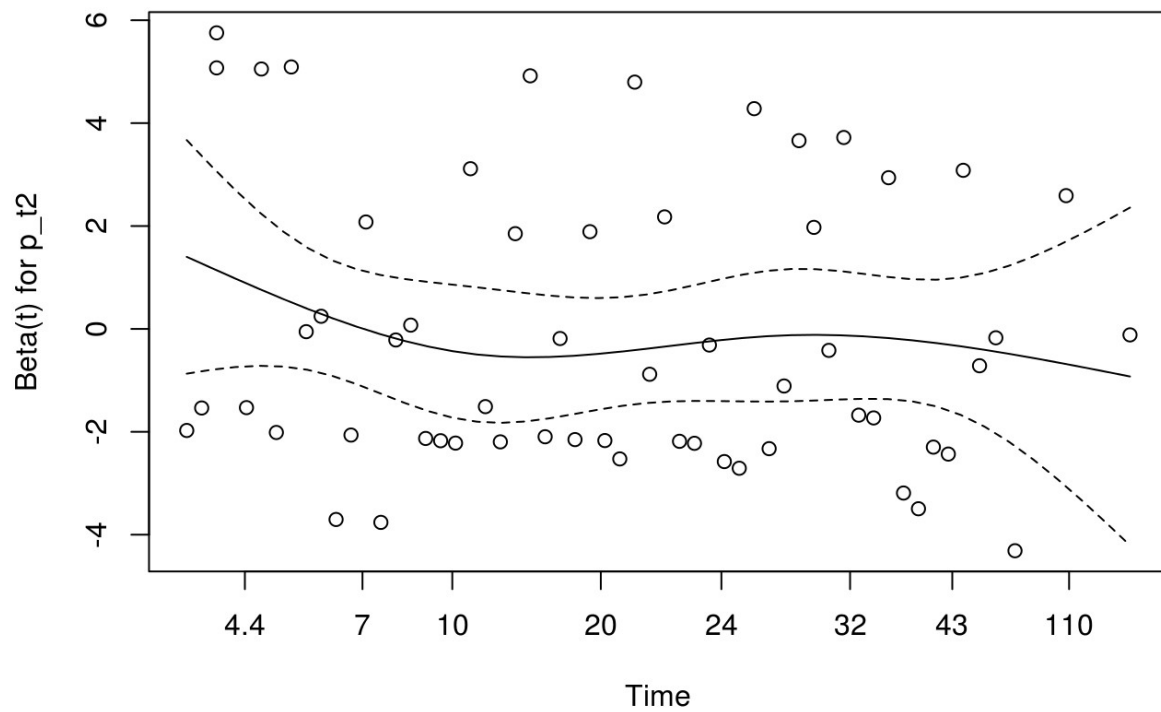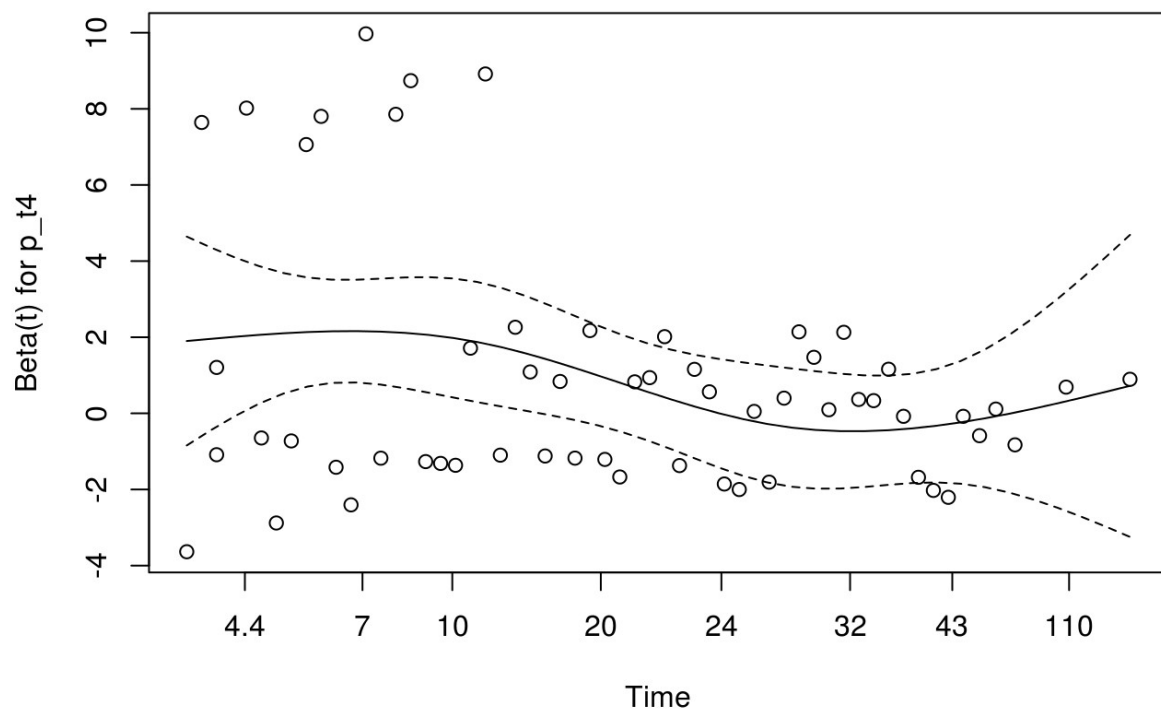

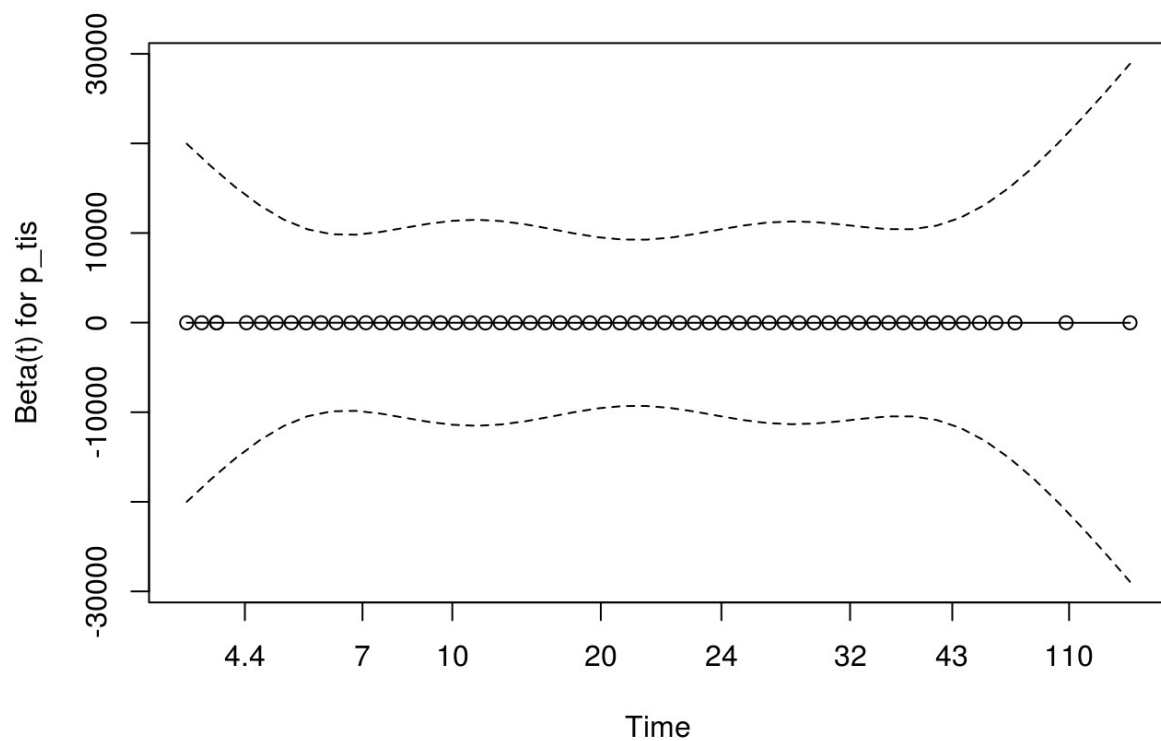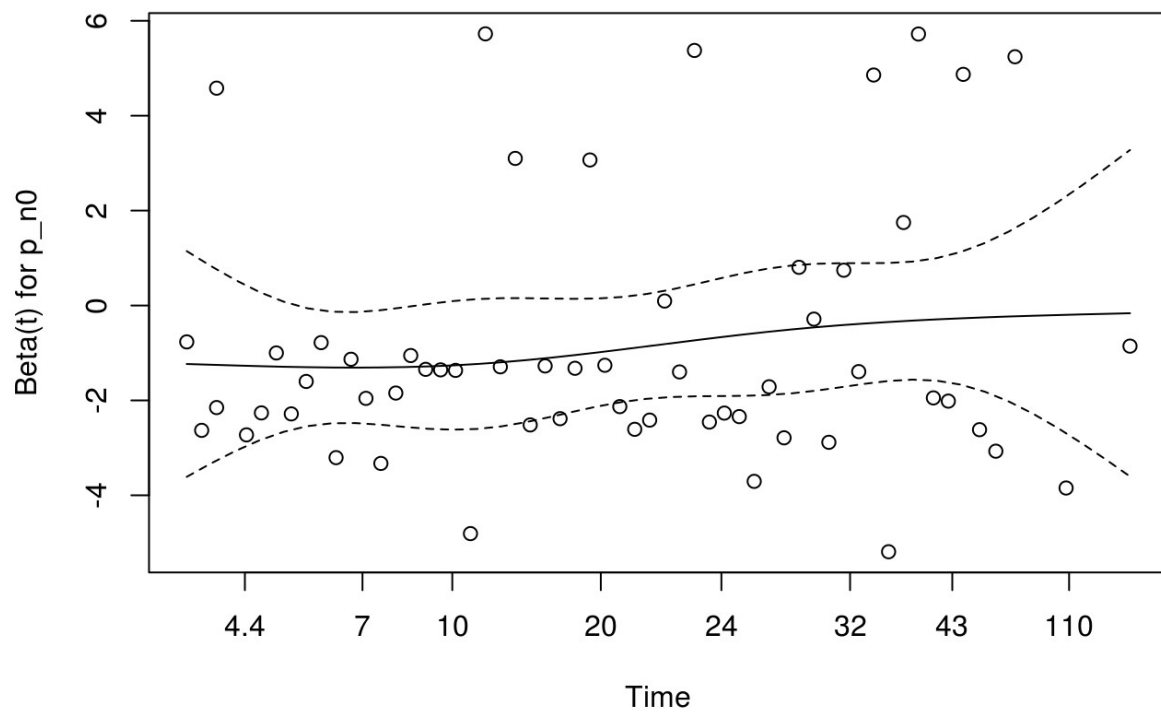

```
# Adjusted Akaike information criterion, Bayesian information criteria. The
smaller the AIC or BIC, the better the fit.
round(AICc(coxClinDiagMultiv, return.K = FALSE, second.ord = TRUE))
```

```
## [1] 427
```

```
round(BIC(coxClinDiagMultiv))
```

```
## [1] 447
```

### Survival table data - univariate: anatomical-based diagnosis (clin\_diag)

```
rowsOfInterest <- c( paste("clin_diag", levels(resCompleteSurvData$clin_diag)[2 : length(levels(resCompleteSurvData$clin_diag))], sep="" ))
myXtable <- xtable(getCoxTable(coxClinDiagUniv, rowsOfInterest), caption =
'Survival table data - univariate: anatomical-based diagnosis (clin_diag)')
digits(myXtable) <- c(0,2,2,2,3)
print(myXtable, type = "html", caption.placement = 'top')
```

### Survival table data - univariate: anatomical-based diagnosis (clin\_diag)

|                                          | HR   | LCI  | UCI  | p     |
|------------------------------------------|------|------|------|-------|
| clin_diagAmpullary carcinoma             | 0.66 | 0.31 | 1.42 | 0.290 |
| clin_diagDistal bile duct cancer         | 0.52 | 0.18 | 1.49 | 0.223 |
| clin_diagGallbladder cancer              | 0.91 | 0.42 | 1.95 | 0.803 |
| clin_diagPerihilar cholangiocarcinoma    | 0.25 | 0.08 | 0.71 | 0.010 |
| clin_diagIntrahepatic cholangiocarcinoma | 0.49 | 0.24 | 1.00 | 0.051 |

### Survival table data - multivariate: anatomical-based diagnosis (clin\_diag)

```
myXtable <- xtable(getCoxTable(coxClinDiagMultiv, rowsOfInterest), caption =
'Survival table data - multivariate: anatomical-based diagnosis (clin_diag)')
digits(myXtable) <- c(0,2,2,2,3)
print(myXtable, type = "html", caption.placement = 'top')
```

### Survival table data - multivariate: anatomical-based diagnosis (clin\_diag)

|                                          | HR   | LCI  | UCI  | p     |
|------------------------------------------|------|------|------|-------|
| clin_diagAmpullary carcinoma             | 0.90 | 0.40 | 2.04 | 0.799 |
| clin_diagDistal bile duct cancer         | 0.68 | 0.20 | 2.31 | 0.536 |
| clin_diagGallbladder cancer              | 1.40 | 0.59 | 3.32 | 0.447 |
| clin_diagPerihilar cholangiocarcinoma    | 0.58 | 0.19 | 1.83 | 0.356 |
| clin_diagIntrahepatic cholangiocarcinoma | 1.78 | 0.74 | 4.26 | 0.195 |

# Resected patients: extrahepatic pancreatobiliary vs intestinal immunohistochemical types

```
# Obtain and attach data set
int_ehpcbiltucResCompleteSurvData <- subset(resCompleteSurvData, (cluster =
= "extrahepatic pancreatobiliary" | cluster == "intestinal"))

# Missing data check
table(is.na(int_ehpcbiltucResCompleteSurvData$cluster))
```

```
##
## FALSE
##      65
```

```
# Check composition of intestinal by clin diag
table(int_ehpcbiltucResCompleteSurvData[ int_ehpcbiltucResCompleteSurvData$c
luster == "intestinal" ,]$clin_diag)
```

```
##
## Ductal pancreatic adenocarcinoma      Ampullary carcinoma
##                                1                                3
##      Distal bile duct cancer      Gallbladder cancer
##                                1                                1
##      Perihilar cholangiocarcinoma  Intrahepatic cholangiocarcinoma
##                                1                                1
```

```
# drop unused cluster levels
int_ehpcbiltucResCompleteSurvData$cluster <- droplevels(int_ehpcbiltucResCom
pleteSurvData$cluster)

# -Resected -tuc patients, by clin_diag
int_ehpcbiltuc_res_PcbilSurvFit <- npsurv(formula = Surv(surv_time, death_ob
served) ~ cluster, data = int_ehpcbiltucResCompleteSurvData)
print(int_ehpcbiltuc_res_PcbilSurvFit, print.rmean = TRUE)
```

```
## Call: npsurv(formula = Surv(surv_time, death_observed) ~ cluster, data =
int_ehpcbiltucResCompleteSurvData)
##
##                                records n.max n.start events *rmean
## cluster=extrahepatic pancreatobiliary      57    57     57    49   33.2
## cluster=intestinal                          8     8      8     4   70.8
##                                *se(rmean) median 0.95LCL 0.95UCL
## cluster=extrahepatic pancreatobiliary      4.24   23.6   18.4   32.7
## cluster=intestinal                        14.45   54.0   31.0    NA
##      * restricted mean with upper limit = 111
```

```
# KM
sampleSize <- nrow(int_ehpcbiltucResCompleteSurvData)
survplot(int_ehpcbiltuc_res_PcbilSurvFit, conf = "none", label.curves = FALSE,
  time.inc = 10, n.risk = TRUE,
  col = c("red", "blueviolet"), lty = 1, lwd = 3, cex.n.risk = 0.8,
  xlab="", ylab = "Survival probability", y.n.risk = -0.2, adj.n.risk = 0)
mtext("Months", side=1, line=2)
title(main=paste("Overall survival extrahepatic pancreatobiliary vs. intestinal\n(n = ", sampleSize, ")", sep = ""))
```

### Overall survival extrahepatic pancreatobiliary vs. intestinal (n = 65)

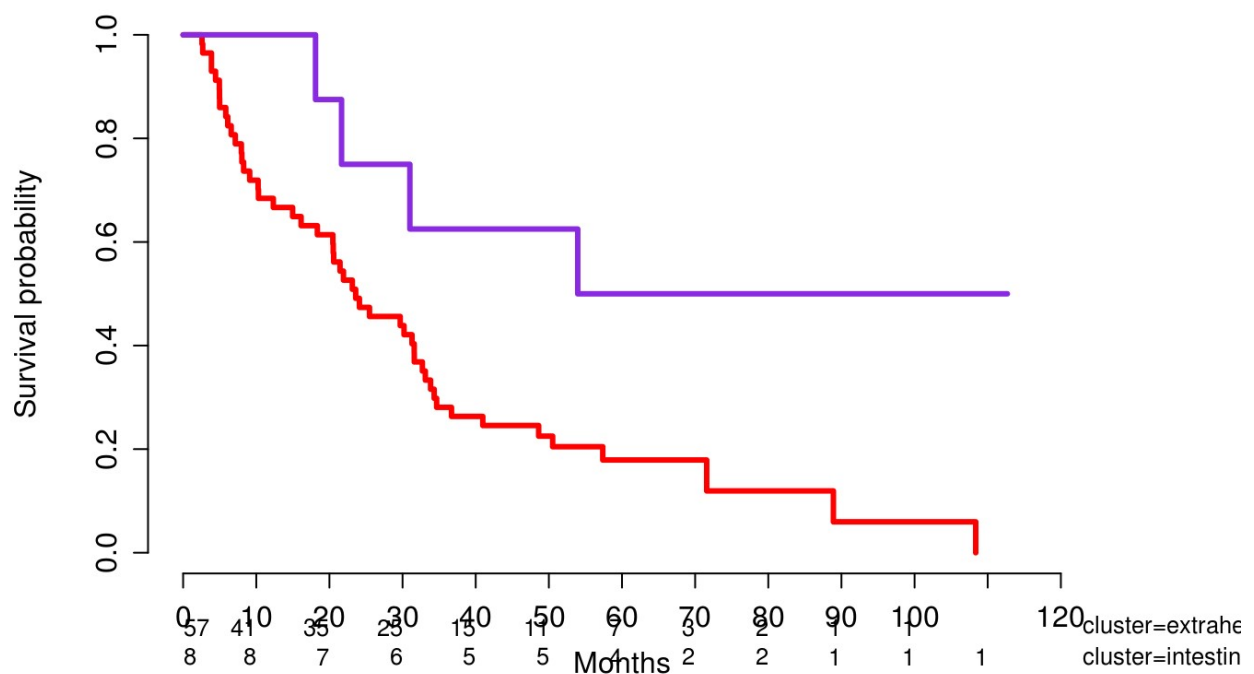

```
# Univariate:
coxPcbilIntUniv <- coxph(Surv(surv_time, death_observed) ~ cluster, data = int_ehpcbiltucResCompleteSurvData)
summary(coxPcbilIntUniv)
```

```
## Call:
## coxph(formula = Surv(surv_time, death_observed) ~ cluster, data = int_ehp
cbiltucResCompleteSurvData)
##
##      n= 65, number of events= 53
##
##              coef exp(coef) se(coef)      z Pr(>|z|)
## clusterintestinal -1.1207    0.3261    0.5252 -2.134    0.0329 *
## ---
## Signif. codes:  0 '***' 0.001 '**' 0.01 '*' 0.05 '.' 0.1 ' ' 1
##
##              exp(coef) exp(-coef) lower .95 upper .95
## clusterintestinal    0.3261      3.067    0.1165    0.9128
##
## Concordance= 0.554  (se = 0.028 )
## Rsquare= 0.091  (max possible= 0.997 )
## Likelihood ratio test= 6.19  on 1 df,   p=0.01286
## Wald test               = 4.55  on 1 df,   p=0.03287
## Score (logrank) test = 5.02  on 1 df,   p=0.02506
```

```
# Test the Proportional Hazards Assumption of a Cox Regression
cox_pha <- cox.zph(coxPcbilIntUniv)
print(cox_pha)
```

```
##              rho    chisq      p
## clusterintestinal 0.0124 0.00822 0.928
```

```
plot(cox_pha)
```

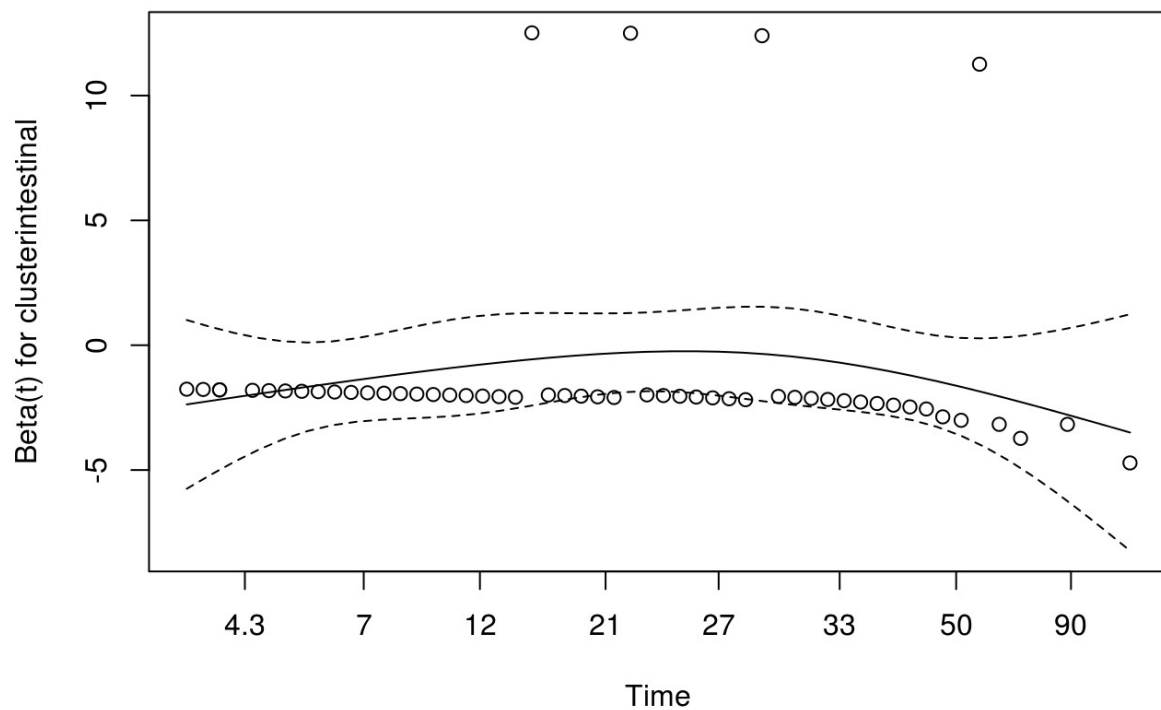

```
# Multivariate Cox proportional hazards regression model.
coxPcbilIntMultiv <- coxph(Surv(surv_time, death_observed) ~ cluster + p_t
+ p_n, data = int_ehpcbiltucResCompleteSurvData)
```

```
## Warning in fitter(X, Y, strats, offset, init, control, weights = weights,
:
## Loglik converged before variable 5 ; beta may be infinite.
```

```
summary(coxPcbilIntMultiv)
```

```
## Call:
## coxph(formula = Surv(surv_time, death_observed) ~ cluster + p_t +
##       p_n, data = int_ehpcbiltucResCompleteSurvData)
##
##      n= 61, number of events= 50
##      (4 observations deleted due to missingness)
##
##              coef  exp(coef)    se(coef)      z Pr(>|z|)
## clusterintestinal -1.665e+00  1.892e-01  6.782e-01 -2.455  0.01409 *
## p_t1              4.913e-01  1.634e+00  6.854e-01  0.717  0.47351
## p_t2             -6.248e-02  9.394e-01  3.522e-01 -0.177  0.85918
## p_t4              1.616e+00  5.031e+00  5.289e-01  3.055  0.00225 **
## p_tis            -1.688e+01  4.661e-08  4.341e+03 -0.004  0.99690
## p_n0             -6.016e-01  5.479e-01  3.870e-01 -1.554  0.12009
## ---
## Signif. codes:  0 '***' 0.001 '**' 0.01 '*' 0.05 '.' 0.1 ' ' 1
##
##              exp(coef) exp(-coef) lower .95 upper .95
## clusterintestinal 1.892e-01  5.285e+00  0.05008  0.7149
## p_t1              1.634e+00  6.118e-01  0.42653  6.2628
## p_t2              9.394e-01  1.064e+00  0.47108  1.8734
## p_t4              5.031e+00  1.987e-01  1.78431 14.1879
## p_tis              4.661e-08  2.145e+07  0.00000    Inf
## p_n0              5.479e-01  1.825e+00  0.25662  1.1699
##
## Concordance= 0.67 (se = 0.044 )
## Rsquare= 0.277 (max possible= 0.996 )
## Likelihood ratio test= 19.81 on 6 df,  p=0.002991
## Wald test              = 15.09 on 6 df,  p=0.01953
## Score (logrank) test = 17.9 on 6 df,  p=0.00649
```

```
# Test the Proportional Hazards Assumption of a Cox Regression
cox_pha <- cox.zph(coxPcbilIntMultiv)
print(cox_pha)
```

```
##              rho    chisq      p
## clusterintestinal  0.00691 3.75e-03 0.9512
## p_t1              -0.03004 4.14e-02 0.8387
## p_t2              -0.23768 2.84e+00 0.0919
## p_t4              -0.10888 7.99e-01 0.3714
## p_tis             -0.49216 7.95e-08 0.9998
## p_n0              0.27800 3.52e+00 0.0608
## GLOBAL              NA 7.65e+00 0.2649
```

```
plot(cox_pha)
```

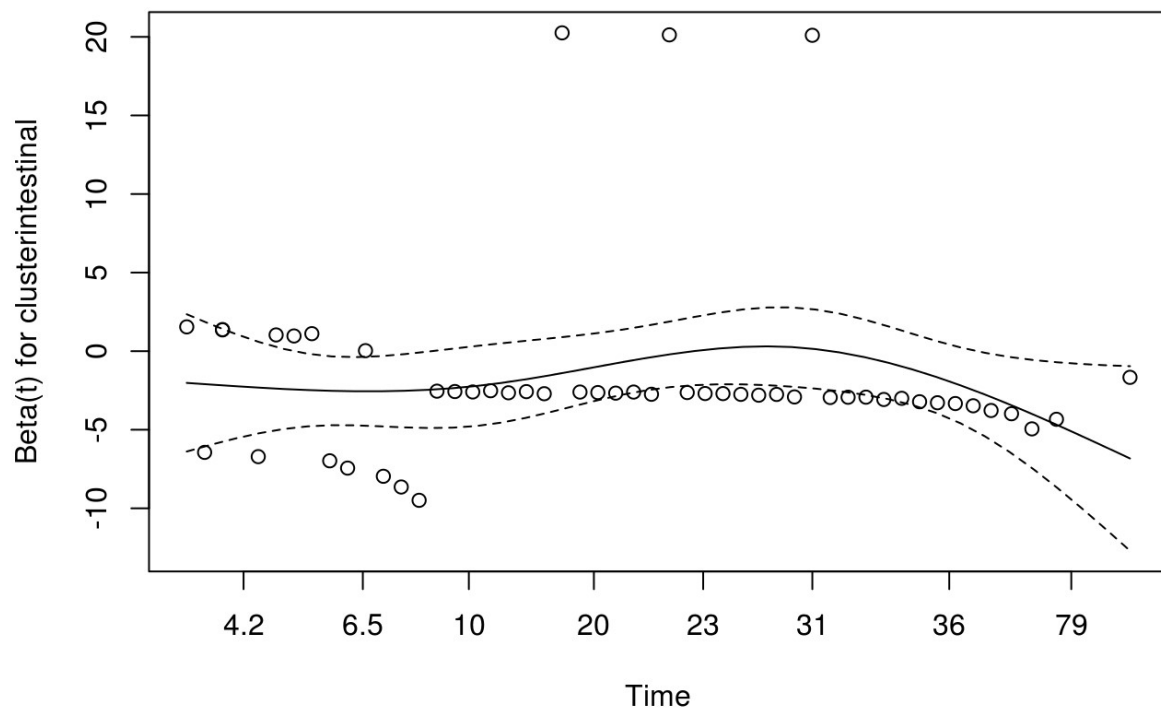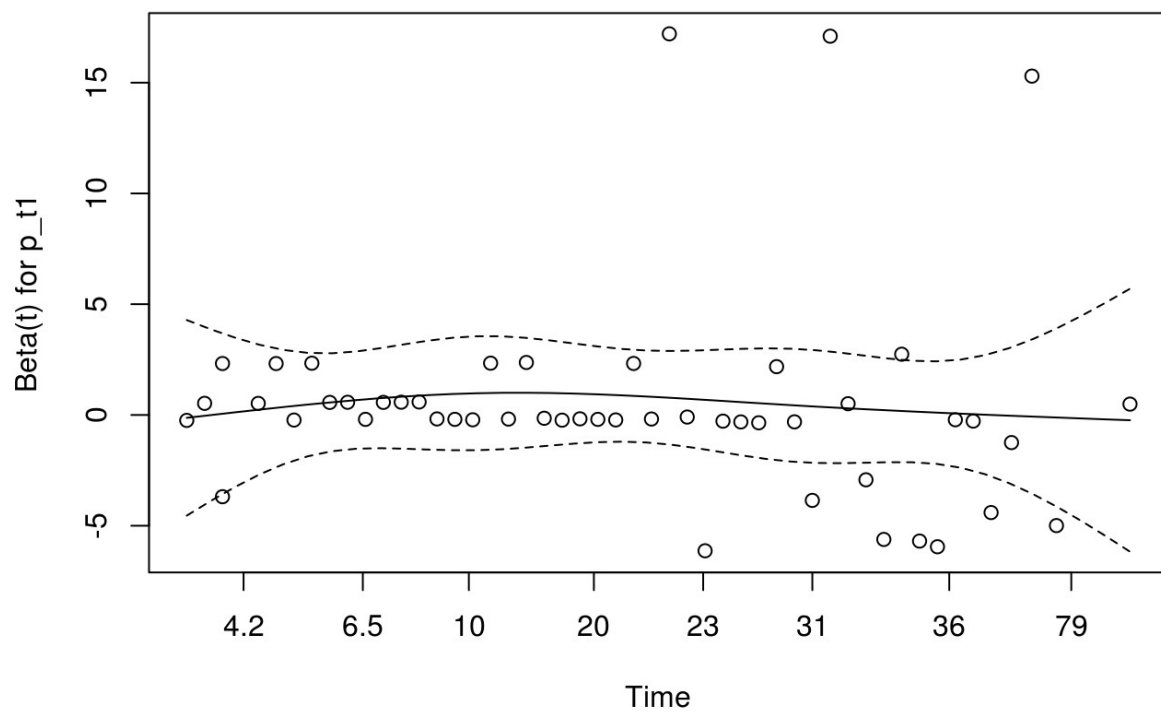

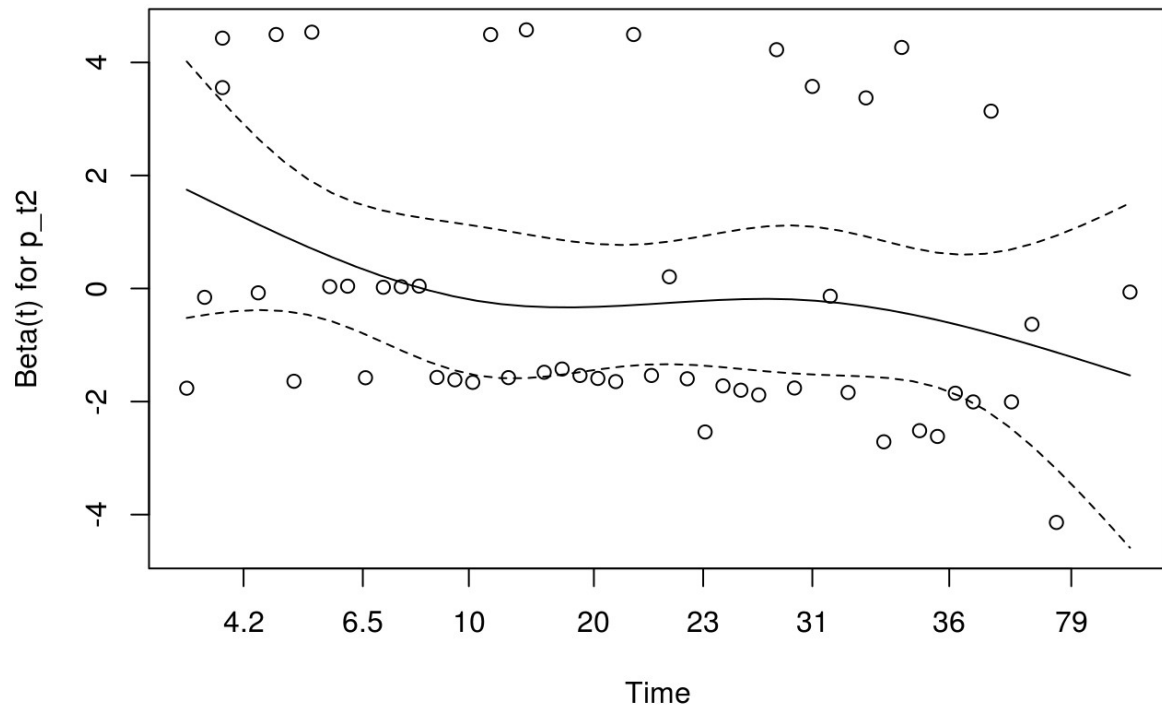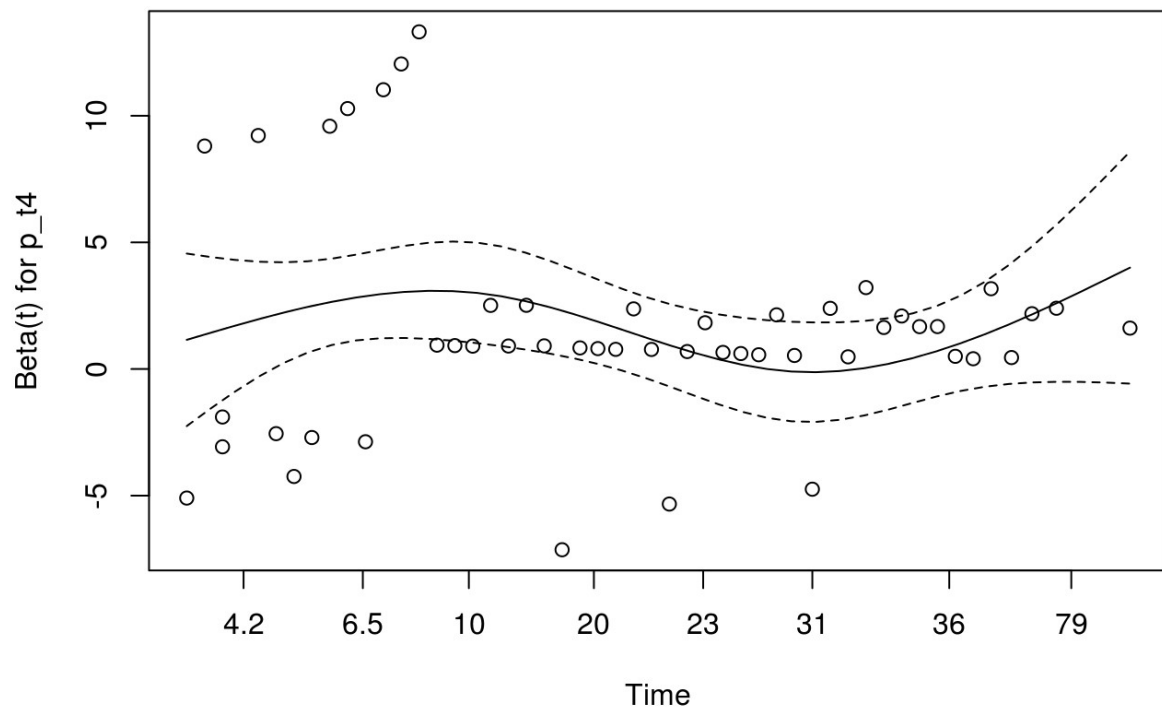

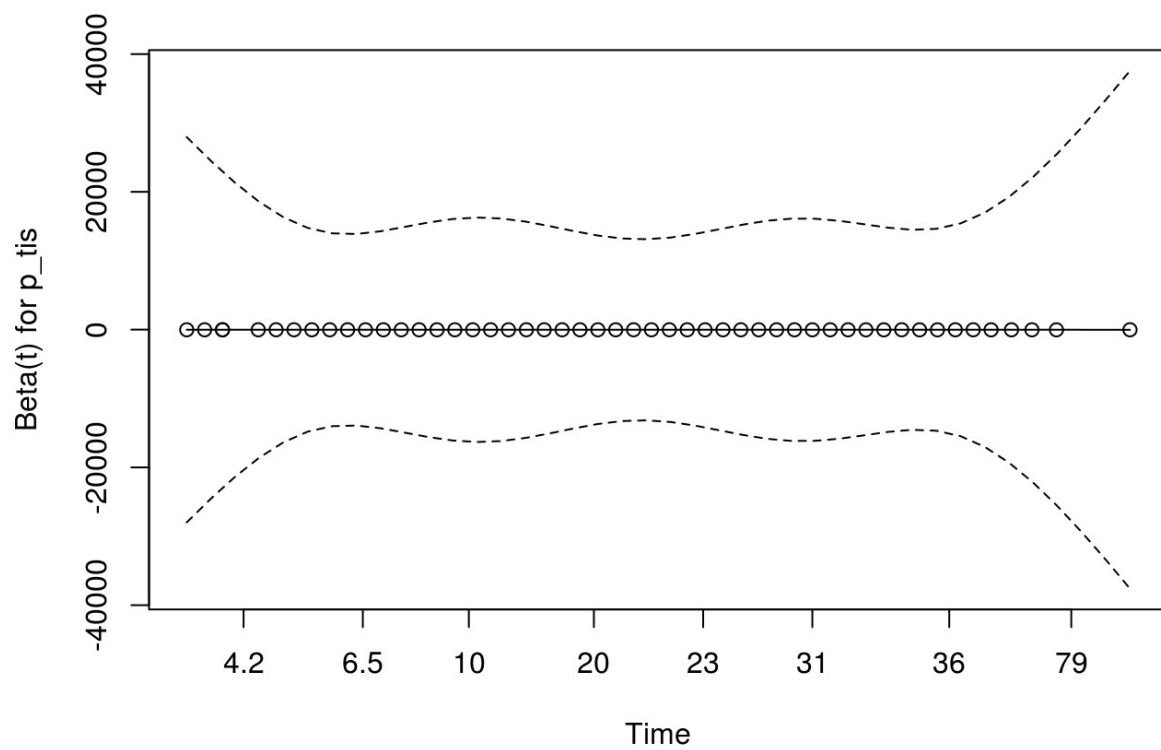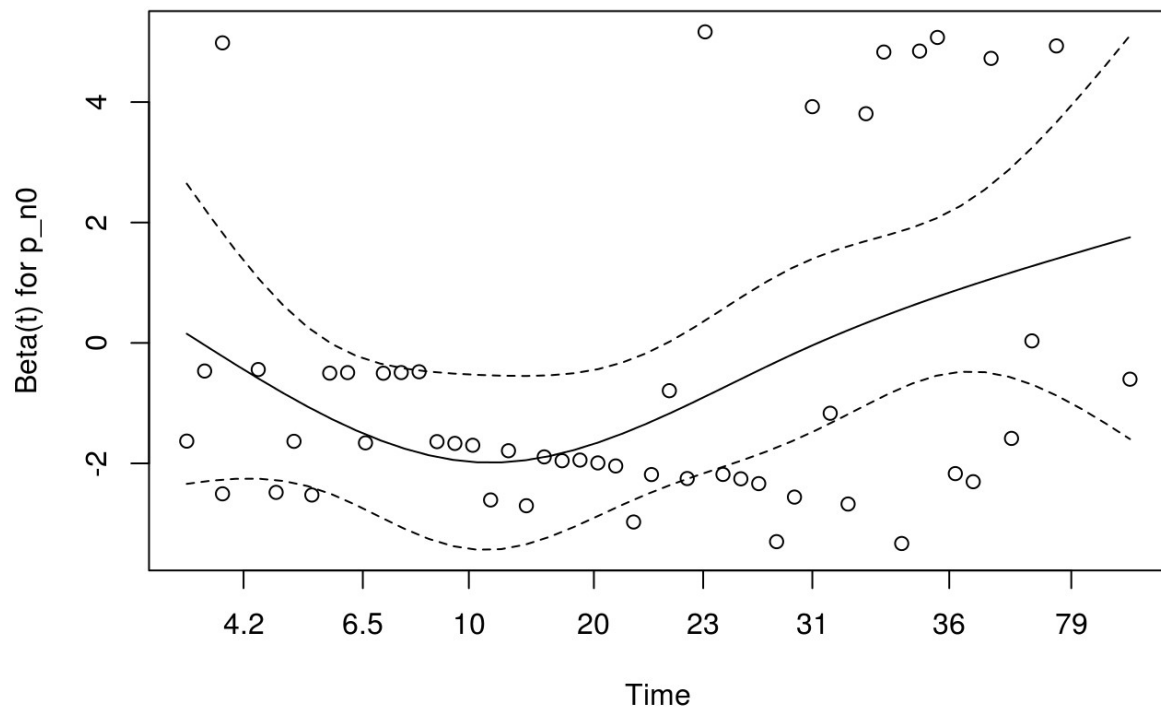

# Resected patients with intrahepatic cholangiocarcinoma (anatomical-based diagnosis): extrahepatic pancreatobiliary vs intrahepatic cholangiocarcinoma immunohistochemical types

```
# Obtain and attach data set
iccResCompleteSurvData <- subset(resCompleteSurvData, (clin_diag == "Intrahepatic cholangiocarcinoma" & (cluster == "extrahepatic pancreatobiliary" | cluster == "intrahepatic cholangiocarcinoma")))
```

```
# Missing data check
table(is.na(iccResCompleteSurvData$cluster))
```

```
##
## FALSE
##      15
```

```
# drop unused levels
iccResCompleteSurvData$cluster <- droplevels(iccResCompleteSurvData$cluster)
iccResCompleteSurvData$p_t <- droplevels(iccResCompleteSurvData$p_t)
```

```
# -Resected ICC patients, by cluster
sampleSize <- nrow(iccResCompleteSurvData)
cluster_icc_res_PcbilSurvFit <- npsurv(formula = Surv(surv_time, death_observed) ~ cluster, data = iccResCompleteSurvData)
print(cluster_icc_res_PcbilSurvFit, print.rmean = TRUE)
```

```
## Call: npsurv(formula = Surv(surv_time, death_observed) ~ cluster, data = iccResCompleteSurvData)
```

```
##
##                                records n.max n.start events
## cluster=extrahepatic pancreatobiliary      5      5      5      4
## cluster=intrahepatic cholangiocarcinoma     10     10     10      6
##                                *rmean *se(rmean) median 0.95LCL
## cluster=extrahepatic pancreatobiliary     25.4     12.44   10.3    4.43
## cluster=intrahepatic cholangiocarcinoma    53.1      9.29   78.5   18.74
##                                0.95UCL
## cluster=extrahepatic pancreatobiliary      NA
## cluster=intrahepatic cholangiocarcinoma      NA
##      * restricted mean with upper limit = 76.6
```

```

survplot(cluster_icc_res_PcbilSurvFit, conf = "none", label.curves = FALSE,
time.inc = 10, n.risk = TRUE,
        col = c("red", "blue"), lty = 1, lwd = 3, cex.n.risk = 0.8,
        xlab="", ylab = "Survival probability", y.n.risk = -0.2, adj.n.ris
k = 0)
mtext("Months", side=1, line=2)
title(main=paste("Overall survival for intrahepatic cholangiocarcinoma\nby i
mmunohistochemical type\n(n = ", sampleSize,")", sep = ""))

```

### Overall survival for intrahepatic cholangiocarcinoma by immunohistochemical type (n = 15)

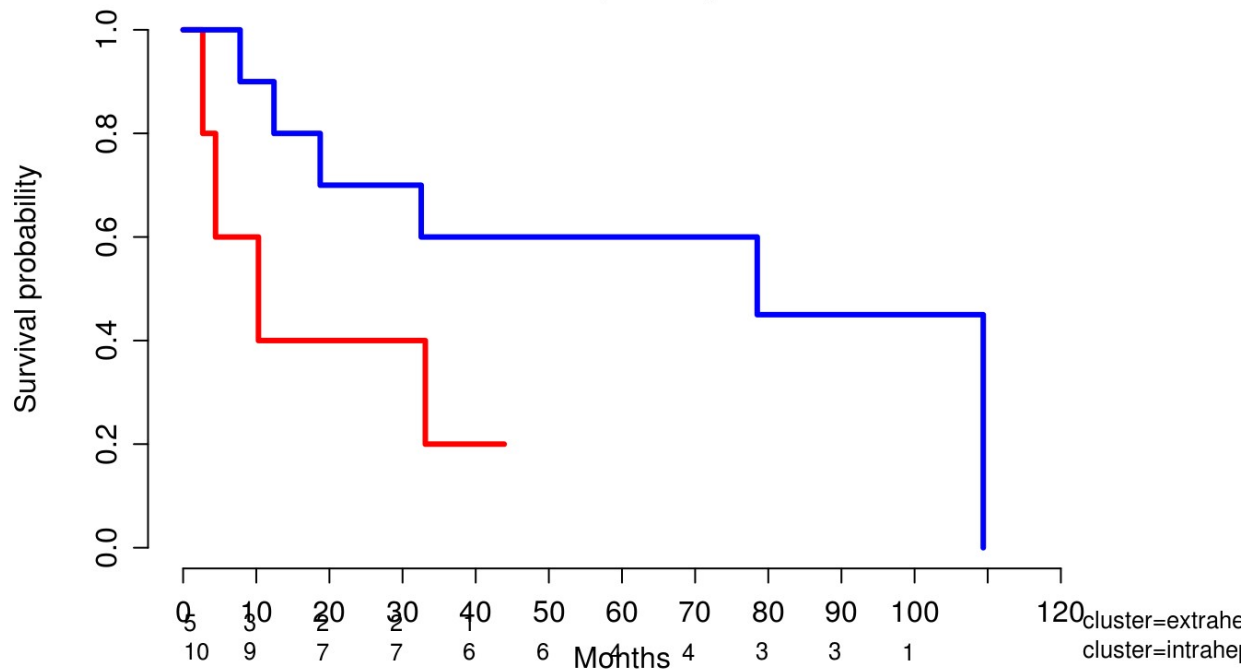

```

survdif(Surv(surv_time, death_observed) ~ cluster, data = iccResCompleteSurvData, rho = 0)

```

```

## Call:
## survdiff(formula = Surv(surv_time, death_observed) ~ cluster,
##          data = iccResCompleteSurvData, rho = 0)
##
##
##              N Observed Expected (O-E)^2/E
## cluster=extrahepatic pancreatobiliary      5          4      1.95      2.14
## cluster=intrahepatic cholangiocarcinoma    10          6      8.05      0.52
##
##              (O-E)^2/V
## cluster=extrahepatic pancreatobiliary      2.87
## cluster=intrahepatic cholangiocarcinoma      2.87
##
## Chisq= 2.9  on 1 degrees of freedom, p= 0.0904

```

```
# Univariate: Log-rank or Mantel-Haenszel test
coxICCUniv <- coxph(Surv(surv_time, death_observed) ~ cluster, data = iccResCompleteSurvData)
summary(coxICCUniv)
```

```
## Call:
## coxph(formula = Surv(surv_time, death_observed) ~ cluster, data = iccResCompleteSurvData)
##
##      n= 15, number of events= 10
##
##               coef exp(coef) se(coef)      z
## clusterintrahepatic cholangiocarcinoma -1.1446    0.3183    0.7122 -1.607
##               Pr(>|z|)
## clusterintrahepatic cholangiocarcinoma    0.108
##
##               exp(coef) exp(-coef) lower .95
## clusterintrahepatic cholangiocarcinoma    0.3183    3.141    0.07883
##               upper .95
## clusterintrahepatic cholangiocarcinoma    1.286
##
## Concordance= 0.649 (se = 0.083 )
## Rsquare= 0.151 (max possible= 0.937 )
## Likelihood ratio test= 2.46 on 1 df, p=0.1169
## Wald test = 2.58 on 1 df, p=0.108
## Score (logrank) test = 2.87 on 1 df, p=0.09043
```

```
# Test the Proportional Hazards Assumption of a Cox Regression
cox_pha <- cox.zph(coxICCUniv)
print(cox_pha)
```

```
##               rho chisq      p
## clusterintrahepatic cholangiocarcinoma 0.191 0.305 0.581
```

```
plot(cox_pha)
```

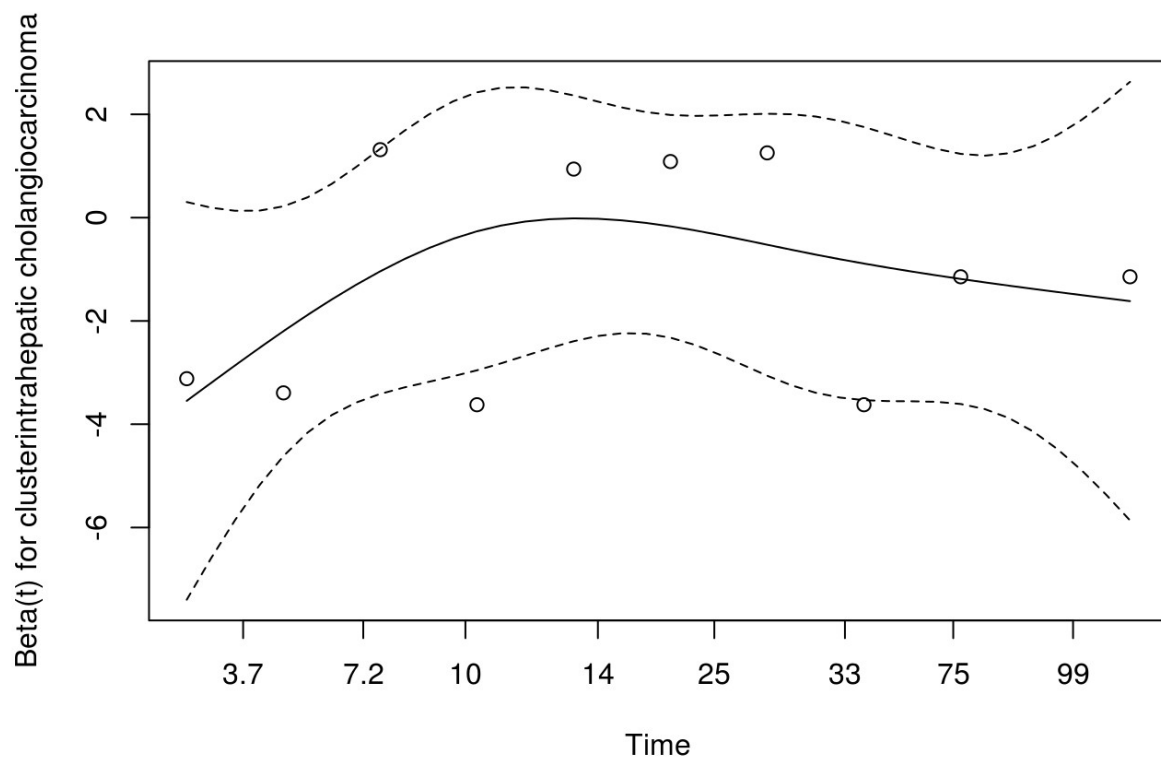

```
# Multivariate Cox proportional hazards regression model.
coxICCMultiv <- coxph(Surv(surv_time, death_observed) ~ cluster + p_t + p_
n, data = iccResCompleteSurvData)
```

```
## Warning in fitter(X, Y, strats, offset, init, control, weights = weights,
:
## Ran out of iterations and did not converge
```

```
summary(coxICCMultiv)
```

```
## Call:
## coxph(formula = Surv(surv_time, death_observed) ~ cluster + p_t +
##       p_n, data = iccResCompleteSurvData)
##
##      n= 11, number of events= 8
##      (4 observations deleted due to missingness)
##
##
##               coef    exp(coef)    se(coef)
## clusterintrahepatic cholangiocarcinoma  2.106e+01  1.397e+09  1.782e+04
## p_t1                -1.648e+00  1.925e-01  1.782e+04
## p_t2                -9.745e-01  3.774e-01  1.782e+04
## p_t4                 3.903e+01  8.950e+16  1.898e+04
## p_n0                -2.150e+01  4.591e-10  1.782e+04
##
##               z Pr(>|z|)
## clusterintrahepatic cholangiocarcinoma  0.001    0.999
## p_t1                0.000    1.000
## p_t2                0.000    1.000
## p_t4                0.002    0.998
## p_n0               -0.001    0.999
##
##               exp(coef) exp(-coef) lower .95
## clusterintrahepatic cholangiocarcinoma 1.397e+09  7.156e-10      0
## p_t1                1.925e-01  5.194e+00      0
## p_t2                3.774e-01  2.650e+00      0
## p_t4                8.950e+16  1.117e-17      0
## p_n0                4.591e-10  2.178e+09      0
##
##               upper .95
## clusterintrahepatic cholangiocarcinoma      Inf
## p_t1                Inf
## p_t2                Inf
## p_t4                Inf
## p_n0                Inf
##
## Concordance= 0.865  (se = 0.119 )
## Rsquare= 0.75  (max possible= 0.943 )
## Likelihood ratio test= 15.26  on 5 df,   p=0.009309
## Wald test              = 0.82  on 5 df,   p=0.9754
## Score (logrank) test = 16.8  on 5 df,   p=0.0049
```

```
# Test the Proportional Hazards Assumption of a Cox Regression
#cox_pha <- cox.zph(coxICCMultiv)
#print(cox_pha)
#plot(cox_pha)
```

– End of survival analysis resected patients –
