# Supplementary material
Source: publisher figshare collection journal article supplement (https://plos.figshare.com/articles/dataset/_/4221999)
Supplement: Supplementary file 1 [file 1 › S3 Table.PDF]

Supplementary Table 3: Machine learning classification/internal validation

|                                                | original          |                    |                                          |            |          |        |             | reduced |                   |                    |             |            |          |       |             |         |
|------------------------------------------------|-------------------|--------------------|------------------------------------------|------------|----------|--------|-------------|---------|-------------------|--------------------|-------------|------------|----------|-------|-------------|---------|
|                                                | No. instance<br>s | No. attribut<br>es | metric                                   | Classifier |          |        |             |         | No. instance<br>s | No. attribut<br>es | metric      | Classifier |          |       |             |         |
|                                                |                   |                    |                                          | Bayes net  | Logistic | SMO    | Random Tree | Average |                   |                    |             | Bayes net  | Logistic | SMO   | Random Tree | Average |
| extrahepatic-pcbil-tuc vs intrahepatic-ccc-tuc | 281               | 27                 | Av. TP                                   | 0,947      | 0,950    | 0,957  | 0,918       | 0,943   | 281               | 11                 | Av. TP      | 0,940      | 0,947    | 0,947 | 0,900       | 0,934   |
|                                                |                   |                    | Av. FP                                   | 0,072      | 0,071    | 0,068  | 0,120       | 0,083   |                   |                    | Av. FP      | 0,104      | 0,072    | 0,079 | 0,163       | 0,105   |
|                                                |                   |                    | Precision A                              | 0,965      | 0,965    | 0,965  | 0,940       | 0,959   |                   |                    | Precision A | 0,946      | 0,965    | 0,960 | 0,917       | 0,947   |
|                                                |                   |                    | Precision B                              | 0,904      | 0,915    | 0,938  | 0,864       | 0,905   |                   |                    | Precision B | 0,922      | 0,904    | 0,914 | 0,855       | 0,899   |
|                                                |                   |                    | Recall A                                 | 0,960      | 0,965    | 0,975  | 0,945       | 0,961   |                   |                    | Recall A    | 0,970      | 0,960    | 0,965 | 0,945       | 0,960   |
|                                                |                   |                    | Recall B                                 | 0,915      | 0,915    | 0,915  | 0,854       | 0,900   |                   |                    | Recall B    | 0,866      | 0,915    | 0,902 | 0,793       | 0,869   |
|                                                |                   |                    | F-measure A                              | 0,962      | 0,965    | 0,970  | 0,942       | 0,960   |                   |                    | F-measure A | 0,958      | 0,962    | 0,962 | 0,931       | 0,953   |
|                                                |                   |                    | F-measure B                              | 0,909      | 0,915    | 0,926  | 0,859       | 0,902   |                   |                    | F-measure B | 0,893      | 0,909    | 0,908 | 0,823       | 0,883   |
|                                                |                   |                    | ROC                                      | 0,982      | 0,981    | 0,945  | 0,942       | 0,963   |                   |                    | ROC         | 0,983      | 0,982    | 0,934 | 0,936       | 0,959   |
|                                                |                   |                    | extrahepatic-pcbil-tuc vs?intestinal-tuc | 223        | 27       | Av. TP | 0,951       | 0,973   |                   |                    | 0,978       | 0,933      | 0,959    | 223   | 7           | Av. TP  |
| Av. FP                                         | 0,262             | 0,186              |                                          |            |          | 0,149  | 0,265       | 0,216   | Av. FP            | 0,262              | 0,188       | 0,223      | 0,262    |       |             | 0,234   |
| Precision A                                    | 0,965             | 0,975              |                                          |            |          | 0,980  | 0,965       | 0,971   | Precision A       | 0,966              | 0,975       | 0,971      | 0,965    |       |             | 0,969   |
| Precision B                                    | 0,810             | 0,950              |                                          |            |          | 0,952  | 0,680       | 0,848   | Precision B       | 0,850              | 0,864       | 1,000      | 0,810    |       |             | 0,881   |
| Recall A                                       | 0,980             | 0,995              |                                          |            |          | 0,995  | 0,960       | 0,983   | Recall A          | 0,985              | 0,985       | 1,000      | 0,980    |       |             | 0,988   |
| Recall B                                       | 0,708             | 0,792              |                                          |            |          | 0,833  | 0,708       | 0,760   | Recall B          | 0,708              | 0,792       | 0,750      | 0,708    |       |             | 0,740   |
| F-measure A                                    | 0,973             | 0,985              |                                          |            |          | 0,988  | 0,962       | 0,977   | F-measure A       | 0,975              | 0,980       | 0,985      | 0,973    |       |             | 0,978   |
| F-measure B                                    | 0,756             | 0,864              |                                          |            |          | 0,889  | 0,694       | 0,801   | F-measure B       | 0,773              | 0,826       | 0,857      | 0,756    |       |             | 0,803   |
| ROC                                            | 0,974             | 0,966              |                                          |            |          | 0,914  | 0,829       | 0,921   | ROC               | 0,982              | 0,951       | 0,875      | 0,844    |       |             | 0,913   |
| intrahepatic-ccc-tuc vs? hcc-tuc               | 150               | 27                 |                                          |            |          | Av. TP | 0,987       | 0,987   | 1,000             | 0,960              | 0,984       | 150        | 12       |       |             | Av. TP  |
|                                                |                   |                    | Av. FP                                   | 0,016      | 0,016    | 0,000  | 0,043       | 0,019   | Av. FP            | 0,024              | 0,016       |            |          | 0,008 | 0,025       | 0,018   |
|                                                |                   |                    | Precision A                              | 0,976      | 0,976    | 1,000  | 0,952       | 0,976   | Precision A       | 0,965              | 0,976       |            |          | 0,988 | 0,988       | 0,979   |
|                                                |                   |                    | Precision B                              | 1,000      | 1,000    | 1,000  | 0,970       | 0,993   | Precision B       | 1,000              | 1,000       |            |          | 1,000 | 0,957       | 0,989   |
|                                                |                   |                    | Recall A                                 | 1,000      | 1,000    | 1,000  | 0,976       | 0,994   | Recall A          | 1,000              | 1,000       |            |          | 1,000 | 0,963       | 0,991   |
|                                                |                   |                    | Recall B                                 | 0,971      | 0,971    | 1,000  | 0,941       | 0,971   | Recall B          | 0,956              | 0,971       |            |          | 0,985 | 0,985       | 0,974   |
|                                                |                   |                    | F-measure A                              | 0,988      | 0,988    | 1,000  | 0,964       | 0,985   | F-measure A       | 0,982              | 0,988       |            |          | 0,994 | 0,975       | 0,985   |
|                                                |                   |                    | F-measure B                              | 0,985      | 0,985    | 1,000  | 0,955       | 0,981   | F-measure B       | 0,977              | 0,985       |            |          | 0,993 | 0,971       | 0,982   |
|                                                |                   |                    | ROC                                      | 1,000      | 0,998    | 1,000  | 0,971       | 0,992   | ROC               | 1,000              | 0,999       |            |          | 0,993 | 0,974       | 0,992   |

|                                                                             |                  |         |           |           |           |           |          |                        |         |         |           |         |           |          |  |
|-----------------------------------------------------------------------------|------------------|---------|-----------|-----------|-----------|-----------|----------|------------------------|---------|---------|-----------|---------|-----------|----------|--|
| Clinical                                                                    |                  |         |           |           |           |           |          | Clustered              |         |         |           |         |           |          |  |
| Bayes net                                                                   |                  |         |           |           |           |           |          | Bayes Net              |         |         |           |         |           |          |  |
| Accuracy                                                                    | 62,84%           |         |           |           |           |           |          | Accuracy               | 93,83%  |         |           |         |           |          |  |
| Class                                                                       | TP Rate          | FP Rate | Precision | Recall    | F-Measure | ROC Area  |          | Class                  | TP Rate | FP Rate | Precision | Recall  | F-Measure | ROC Area |  |
| Pancreas Ac                                                                 | 0,827            | 0,263   | 0,618     | 0,827     | 0,708     | 0,841     |          | extrahepatic-pcbil-tuc | 0,955   | 0,075   | 0,936     | 0,955   | 0,945     | 0,98     |  |
| Hepatocellular Cancer                                                       | 0,91             | 0,018   | 0,922     | 0,91      | 0,916     | 0,99      |          | hcc-tuc                | 0,985   | 0       | 1         | 0,985   | 0,993     | 1        |  |
| Gallbladder Ac                                                              | 0                | 0,051   | 0         | 0         | 0         | 0,663     |          | intrahepatic-ccc-tuc   | 0,902   | 0,021   | 0,925     | 0,902   | 0,914     | 0,988    |  |
| Intrahepatic Cholangiocarcinoma                                             | 0,684            | 0,116   | 0,65      | 0,684     | 0,667     | 0,854     |          | intestinal-tuc         | 0,792   | 0,011   | 0,826     | 0,792   | 0,809     | 0,976    |  |
| Ampulla Ac                                                                  | 0,167            | 0,026   | 0,286     | 0,167     | 0,211     | 0,837     |          | Weighted Avg.          | 0,938   | 0,045   | 0,938     | 0,938   | 0,938     | 0,985    |  |
| Perihiliary Ac                                                              | 0                | 0,021   | 0         | 0         | 0         | 0,695     |          |                        |         |         |           |         |           |          |  |
| Distal Bile Duct Ac                                                         | 0                | 0,005   | 0         | 0         | 0         | 0,751     |          |                        |         |         |           |         |           |          |  |
| Weighted Avg.                                                               | 0,628            | 0,128   | 0,559     | 0,628     | 0,587     | 0,845     |          |                        |         |         |           |         |           |          |  |
|                                                                             |                  |         |           |           |           |           |          |                        |         |         |           |         |           |          |  |
| Simple Logic                                                                |                  |         |           |           |           |           |          | Simple Logic           |         |         |           |         |           |          |  |
| Accuracy                                                                    | 64,79%           |         |           |           |           |           |          | Accuracy               | 94,64%  |         |           |         |           |          |  |
| Class                                                                       | TP Rate          | FP Rate | Precision | Recall    | F-Measure | ROC Area  |          | Class                  | TP Rate | FP Rate | Precision | Recall  | F-Measure | ROC Area |  |
| Pancreas Ac                                                                 | 0,835            | 0,27    | 0,614     | 0,835     | 0,707     | 0,849     |          | extrahepatic-pcbil-tuc | 0,97    | 0,075   | 0,937     | 0,97    | 0,953     | 0,987    |  |
| Hepatocellular Cancer                                                       | 0,936            | 0,021   | 0,913     | 0,936     | 0,924     | 0,993     |          | hcc-tuc                | 0,985   | 0       | 1         | 0,985   | 0,993     | 1        |  |
| Gallbladder Ac                                                              | 0,081            | 0,046   | 0,15      | 0,081     | 0,105     | 0,685     |          | intrahepatic-ccc-tuc   | 0,915   | 0,024   | 0,915     | 0,915   | 0,915     | 0,99     |  |
| Intrahepatic Cholangiocarcinoma                                             | 0,673            | 0,122   | 0,635     | 0,673     | 0,653     | 0,843     |          | intestinal-tuc         | 0,75    | 0       | 1         | 0,75    | 0,857     | 0,991    |  |
| Ampulla Ac                                                                  | 0,25             | 0,008   | 0,667     | 0,25      | 0,364     | 0,855     |          | Weighted Avg.          | 0,946   | 0,045   | 0,948     | 0,946   | 0,946     | 0,99     |  |
| Perihiliary Ac                                                              | 0,037            | 0,016   | 0,143     | 0,037     | 0,059     | 0,71      |          |                        |         |         |           |         |           |          |  |
| Distal Bile Duct Ac                                                         | 0                | 0       | 0         | 0         | 0         | 0,631     |          |                        |         |         |           |         |           |          |  |
| Weighted Avg.                                                               | 0,648            | 0,131   | 0,597     | 0,648     | 0,608     | 0,848     |          |                        |         |         |           |         |           |          |  |
|                                                                             |                  |         |           |           |           |           |          |                        |         |         |           |         |           |          |  |
| SVM-SMO                                                                     |                  |         |           |           |           |           |          | SVM-SMO                |         |         |           |         |           |          |  |
| Accuracy                                                                    | 65,04%           |         |           |           |           |           |          | Accuracy               | 94,64%  |         |           |         |           |          |  |
| Class                                                                       | TP Rate          | FP Rate | Precision | Recall    | F-Measure | ROC Area  |          | Class                  | TP Rate | FP Rate | Precision | Recall  | F-Measure | ROC Area |  |
| Pancreas Ac                                                                 | 0,871            | 0,311   | 0,59      | 0,871     | 0,703     | 0,807     |          | extrahepatic-pcbil-tuc | 0,955   | 0,063   | 0,945     | 0,955   | 0,95      | 0,955    |  |
| Hepatocellular Cancer                                                       | 0,949            | 0,015   | 0,937     | 0,949     | 0,943     | 0,984     |          | hcc-tuc                | 1       | 0       | 1         | 1       | 1         | 1        |  |
| Gallbladder Ac                                                              | 0,162            | 0,043   | 0,273     | 0,162     | 0,203     | 0,532     |          | intrahepatic-ccc-tuc   | 0,939   | 0,021   | 0,928     | 0,939   | 0,933     | 0,972    |  |
| Intrahepatic Cholangiocarcinoma                                             | 0,643            | 0,1     | 0,67      | 0,643     | 0,656     | 0,75      |          | intestinal-tuc         | 0,75    | 0,009   | 0,857     | 0,75    | 0,8       | 0,945    |  |
| Ampulla Ac                                                                  | 0,083            | 0,008   | 0,4       | 0,083     | 0,138     | 0,783     |          | Weighted Avg.          | 0,946   | 0,039   | 0,946     | 0,946   | 0,946     | 0,966    |  |
| Perihiliary Ac                                                              | 0                | 0,01    | 0         | 0         | 0         | 0,537     |          |                        |         |         |           |         |           |          |  |
| Distal Bile Duct Ac                                                         | 0                | 0       | 0         | 0         | 0         | 0,568     |          |                        |         |         |           |         |           |          |  |
| Weighted Avg.                                                               | 0,65             | 0,138   | 0,588     | 0,65      | 0,603     | 0,78      |          |                        |         |         |           |         |           |          |  |
|                                                                             |                  |         |           |           |           |           |          |                        |         |         |           |         |           |          |  |
| Random forest                                                               |                  |         |           |           |           |           |          | Random forest          |         |         |           |         |           |          |  |
| Accuracy                                                                    | 64,06%           |         |           |           |           |           |          | Accuracy               | 91,15%  |         |           |         |           |          |  |
| Class                                                                       | TP Rate          | FP Rate | Precision | Recall    | F-Measure | ROC Area  |          | Class                  | TP Rate | FP Rate | Precision | Recall  | F-Measure | ROC Area |  |
| Pancreas Ac                                                                 | 0,871            | 0,326   | 0,579     | 0,871     | 0,695     | 0,83      |          | extrahepatic-pcbil-tuc | 0,975   | 0,155   | 0,878     | 0,975   | 0,924     | 0,972    |  |
| Hepatocellular Cancer                                                       | 0,949            | 0,03    | 0,881     | 0,949     | 0,914     | 0,987     |          | hcc-tuc                | 0,985   | 0       | 1         | 0,985   | 0,993     | 1        |  |
| Gallbladder Ac                                                              | 0,054            | 0,024   | 0,182     | 0,054     | 0,083     | 0,534     |          | intrahepatic-ccc-tuc   | 0,829   | 0,017   | 0,932     | 0,829   | 0,877     | 0,98     |  |
| Intrahepatic Cholangiocarcinoma                                             | 0,622            | 0,106   | 0,649     | 0,622     | 0,635     | 0,812     |          | intestinal-tuc         | 0,458   | 0,003   | 0,917     | 0,458   | 0,611     | 0,958    |  |
| Ampulla Ac                                                                  | 0,125            | 0,01    | 0,429     | 0,125     | 0,194     | 0,731     |          | Weighted Avg.          | 0,912   | 0,087   | 0,914     | 0,912   | 0,906     | 0,978    |  |
| Perihiliary Ac                                                              | 0,037            | 0,008   | 0,25      | 0,037     | 0,065     | 0,668     |          |                        |         |         |           |         |           |          |  |
| Distal Bile Duct Ac                                                         | 0                | 0       | 0         | 0         | 0         | 0,433     |          |                        |         |         |           |         |           |          |  |
| Weighted Avg.                                                               | 0,641            | 0,145   | 0,578     | 0,641     | 0,586     | 0,807     |          |                        |         |         |           |         |           |          |  |
|                                                                             |                  |         |           |           |           |           |          |                        |         |         |           |         |           |          |  |
| Classifier-average                                                          |                  |         |           |           |           |           |          | Classifier-average     |         |         |           |         |           |          |  |
| Accuracy                                                                    | 64,18%           |         |           |           |           |           |          | Accuracy               | 93,48%  |         |           |         |           |          |  |
| Class                                                                       | TP Rate          | FP Rate | Precision | Recall    | F-Measure | ROC Area  |          | Class                  | TP Rate | FP Rate | Precision | Recall  | F-Measure | ROC Area |  |
| Pancreas Ac                                                                 | 0,851            | 0,2925  | 0,60025   | 0,851     | 0,70325   | 0,83175   |          | extrahepatic-pcbil-tuc | 0,96375 | 0,092   | 0,924     | 0,96375 | 0,943     | 0,9735   |  |
| Hepatocellular Cancer                                                       | 0,936            | 0,021   | 0,91325   | 0,936     | 0,92425   | 0,9885    |          | hcc-tuc                | 0,98875 | 0       | 1         | 0,98875 | 0,99475   | 1        |  |
| Gallbladder Ac                                                              | 0,07425          | 0,041   | 0,15125   | 0,07425   | 0,09775   | 0,6035    |          | intrahepatic-ccc-tuc   | 0,89625 | 0,02075 | 0,925     | 0,89625 | 0,90975   | 0,9825   |  |
| Intrahepatic Cholangiocarcinoma                                             | 0,6555           | 0,111   | 0,651     | 0,6555    | 0,65275   | 0,81475   |          | intestinal-tuc         | 0,6875  | 0,00575 | 0,9       | 0,6875  | 0,76925   | 0,9675   |  |
| Ampulla Ac                                                                  | 0,15625          | 0,013   | 0,4455    | 0,15625   | 0,22675   | 0,8015    |          | Weighted Avg.          | 0,9355  | 0,054   | 0,9365    | 0,9355  | 0,934     | 0,97975  |  |
| Perihiliary Ac                                                              | 0,0185           | 0,01375 | 0,09825   | 0,0185    | 0,031     | 0,6525    |          |                        |         |         |           |         |           |          |  |
| Distal Bile Duct Ac                                                         | 0                | 0,00125 | 0         | 0         | 0         | 0,59575   |          |                        |         |         |           |         |           |          |  |
| Weighted Avg.                                                               | 0,64175          | 0,1355  | 0,5805    | 0,64175   | 0,596     | 0,82      |          |                        |         |         |           |         |           |          |  |
|                                                                             |                  |         |           |           |           |           |          |                        |         |         |           |         |           |          |  |
| Summary table                                                               |                  |         |           |           |           |           |          |                        |         |         |           |         |           |          |  |
| Anatomical based diagnosis classes - averaged results over four classifiers |                  |         |           |           |           |           |          |                        |         |         |           |         |           |          |  |
| Accuracy                                                                    | 64,18%           |         |           |           |           |           |          |                        |         |         |           |         |           |          |  |
| Class                                                                       | No. of instances | TP Rate | FP Rate   | Precision | Recall    | F-Measure | ROC Area |                        |         |         |           |         |           |          |  |
| Pancreas Ac                                                                 | 139              | 0,851   | 0,2925    | 0,60025   | 0,851     | 0,70325   | 0,83175  |                        |         |         |           |         |           |          |  |
| Hepatocellular Cancer                                                       | 78               | 0,936   | 0,021     | 0,91325   | 0,936     | 0,92425   | 0,9885   |                        |         |         |           |         |           |          |  |
| Gallbladder Ac                                                              | 37               | 0,07425 | 0,041     | 0,15125   | 0,07425   | 0,09775   | 0,6035   |                        |         |         |           |         |           |          |  |
| Intrahepatic Cholangiocarcinoma                                             | 98               | 0,6555  | 0,111     | 0,651     | 0,6555    | 0,65275   | 0,81475  |                        |         |         |           |         |           |          |  |
| Ampulla Ac                                                                  | 24               | 0,15625 | 0,013     | 0,4455    | 0,15625   | 0,22675   | 0,8015   |                        |         |         |           |         |           |          |  |
| Perihiliary Ac                                                              | 27               | 0,0185  | 0,01375   | 0,09825   | 0,0185    | 0,031     | 0,6525   |                        |         |         |           |         |           |          |  |
| Distal Bile Duct Ac                                                         | 6                | 0       | 0,00125   | 0         | 0         | 0         | 0,59575  |                        |         |         |           |         |           |          |  |
| Weighted Avg.                                                               |                  | 0,64175 | 0,1355    | 0,5805    | 0,64175   | 0,596     | 0,82     |                        |         |         |           |         |           |          |  |
|                                                                             |                  |         |           |           |           |           |          |                        |         |         |           |         |           |          |  |
| Proposed new classification system - averaged results over four classifiers |                  |         |           |           |           |           |          |                        |         |         |           |         |           |          |  |
| Accuracy                                                                    | 93,48%           |         |           |           |           |           |          |                        |         |         |           |         |           |          |  |
| Class                                                                       | No. of instances | TP Rate | FP Rate   | Precision | Recall    | F-Measure | ROC Area |                        |         |         |           |         |           |          |  |
| extrahepatic-pcbil-tuc                                                      | 199              | 0,96375 | 0,092     | 0,924     | 0,96375   | 0,943     | 0,9735   |                        |         |         |           |         |           |          |  |
| hcc-tuc                                                                     | 68               | 0,98875 | 0         | 1         | 0,98875   | 0,99475   | 1        |                        |         |         |           |         |           |          |  |
| intrahepatic-ccc-tuc                                                        | 82               | 0,89625 | 0,02075   | 0,925     | 0,89625   | 0,90975   | 0,9825   |                        |         |         |           |         |           |          |  |
| intestinal-tuc                                                              | 24               | 0,6875  | 0,00575   | 0,9       | 0,6875    | 0,76925   | 0,9675   |                        |         |         |           |         |           |          |  |
| Weighted Avg.                                                               |                  | 0,9355  | 0,054     | 0,9365    | 0,9355    | 0,934     | 0,97975  |                        |         |         |           |         |           |          |  |
